# Supplementary material for: The representation of Indigenous peoples in chronic disease clinical trials in Australia, Canada, New Zealand, and the United States
Source: PubMed Central journal article supplement (PMC8847750; doi:10.1177/17407745211069153), 2022-01-06

## **Supplementary Tables and Figures Legend**

|                                                              |    |
|--------------------------------------------------------------|----|
| Table S1. Summary of Indigenous specific studies.            | 2  |
| Table S2. Summary of randomly selected studies.              | 19 |
| Figure S1. PRISMA flow diagram of general population trials. | 77 |

**Table S1. Summary of Indigenous specific studies included in environmental scan.**

| Title                                                                                                                                                                          | Start Date | Location  | Indigenous Identity    | Conditions             | Interventions | Gender | Age                | Actual Indigenous Enrollment | Study Designs                           | Community Partner | Funded By |
|--------------------------------------------------------------------------------------------------------------------------------------------------------------------------------|------------|-----------|------------------------|------------------------|---------------|--------|--------------------|------------------------------|-----------------------------------------|-------------------|-----------|
| Associations between periodontal disease and cardiovascular surrogate endpoints in an adult Indigenous population                                                              | 2010       | Australia | Indigenous             | Dental Disease         | Other         | All    | 25 Years and older | 269                          | Randomized, Delayed intervention design | Not stated        | NHMRC     |
| Getting better at chronic care in North Queensland: A cluster randomized trial of patient-centred care delivered by Indigenous health professionals to Indigenous clients.     | 2010       | Australia | Indigenous             | Cardiovascular Disease | Combination   | All    | 18 to 65 Years     | No data obtained             | Randomized, Parallel Assignment         | Yes               | NHMRC     |
| Reducing disease burden and health inequalities arising from chronic dental disease among Indigenous children: an early childhood caries intervention                          | 2011       | Australia | Aboriginal             | Dental Disease         | Behavioral    | All    | No age limit       | 446                          | Randomized, Parallel Assignment         | Yes               | NHMRC     |
| Tasmanian Aborigines Step Up to Health: evaluation of a cardiopulmonary rehabilitation and secondary prevention program                                                        | 2011       | Australia | Aborigine              | Cardiovascular Disease | Combination   | All    | 18 Years and older | 92                           | Non-randomized, Single Group            | Yes               | Other     |
| The Central Australian Heart Protection Study: A Randomised Trial of Nurse-Led, Family Based Secondary Prevention of Acute Coronary Syndromes.                                 | 2011       | Australia | Indigenous             | Cardiovascular Disease | Combination   | All    | 18 Years and older | No data obtained             | Randomized, Parallel Assignment         | Not stated        | NHMRC     |
| "Smiles not Tears" an Aboriginal Health Worker Led Dental Health Education Program.                                                                                            | 2012       | Australia | Aboriginal             | Dental Disease         | Combination   | All    | 5 to 7 months      | 187                          | Non-Randomized, Single Group            | Yes               | NHMRC     |
| Pilot of a self-help app to support suicide prevention amongst Indigenous youth                                                                                                | 2013       | Australia | Indigenous             | Mental illness         | Behavioral    | All    | 18 to 25 Years     | 61                           | Randomized                              | Yes               | Other     |
| The evaluation of telehealth technologies to facilitate clinical outcomes improvements in eye care, diabetes and cardiovascular disease management for Indigenous Australians. | 2013       | Australia | Indigenous Australians | Diabetes               | Other         | All    | 18 Years and older | Not completed                | Non-randomized                          | Yes               | NHMRC     |

|                                                                                                                                                                                                         |      |           |                                        |                        |            |     |                     |                      |                                 |            |       |
|---------------------------------------------------------------------------------------------------------------------------------------------------------------------------------------------------------|------|-----------|----------------------------------------|------------------------|------------|-----|---------------------|----------------------|---------------------------------|------------|-------|
| Using a patient-focussed electronic health system for reducing heart disease risk in people with cardiovascular disease.                                                                                | 2013 | Australia | Aboriginal                             | Cardiovascular Disease | Behavioral | All | 18 Years and older  | No published results | Randomized, Parallel Assignment | Not stated | NHMRC |
| Using Pneumococcal Vaccines in Combination for Maximum Protection From Ear and Lung Infections in First 3 Years of Life                                                                                 | 2013 | Australia | Australian Indigenous                  | Respiratory disease    | Biological | All | 9 Months to 3 Years | 261                  | Randomized, Parallel Assignment | Yes        | NHMRC |
| Far North Queensland Hospital Avoidance Trial - chronic disease case management compared with usual care in reducing avoidable hospital and Emergency Department admissions.                            | 2014 | Australia | Aboriginal or Torres Strait Islander   | Cardiovascular Disease | Other      | All | 18 to 75 Years      | No data obtained     | Randomized                      | Not stated | Other |
| Optimum Thiamine Intervention (OpTIn) Trial                                                                                                                                                             | 2014 | Australia | Aboriginal and non-Aboriginal patients | Mental illness         | Drug       | All | 18 to 65 Years      | No published results | Randomized, Parallel Assignment | Not stated | NHMRC |
| Optimum Thiamine Intervention for Treatment and Prevention of Wernicke-Korsakoff Syndrome (WKS): A Randomised Controlled Trial.                                                                         | 2014 | Australia | Aboriginal                             | Mental illness         | Drug       | All | 18 to 65 Years      | No published results | Randomized, Parallel Assignment | Not stated | NHMRC |
| The effect of a culturally and linguistically appropriate patient education tool to improve conclusive electrocardiography stress testing results in Aboriginal and non-Aboriginal Australian patients. | 2014 | Australia | Aboriginal                             | Cardiovascular Disease | Behavioral | All | 18 Years and older  | No published results | Randomized, Parallel Assignment | Not stated | Other |
| Using an app for suicide prevention amongst young Indigenous people: A randomised controlled trial                                                                                                      | 2014 | Australia | Indigenous                             | Mental illness         | Behavioral | All | 16 Years and older  | 350                  | Randomized                      | Not stated | NHMRC |
| Preventing tooth decay in children in a remote community in Australia.                                                                                                                                  | 2015 | Australia | Indigenous                             | Dental Disease         | Other      | All | 4 to 17 Years       | 435                  | Non-randomized, Single Group    | Yes        | NHMRC |
| The Aboriginal Cardiovascular Omega-3 Randomised Controlled Trial                                                                                                                                       | 2015 | Australia | Indigenous Australian                  | Cardiovascular Disease | Drug       | All | 18 Years and older  | 89                   | Randomized, Parallel Assignment | Not stated | NHMRC |
| The effect of a periodontal intervention on renal health                                                                                                                                                | 2015 | Australia | Aboriginal                             | Kidney Disease         | Procedure  | All | 18 Years            | 600                  | Randomized, Parallel Assignment | Yes        | NHMRC |

|                                                                                                                                                                                             |      |           |                                               |                        |             |        |                     |                      |                                 |            |       |
|---------------------------------------------------------------------------------------------------------------------------------------------------------------------------------------------|------|-----------|-----------------------------------------------|------------------------|-------------|--------|---------------------|----------------------|---------------------------------|------------|-------|
| in Aboriginal Australian adults with kidney disease                                                                                                                                         |      |           |                                               |                        |             |        | and older           |                      |                                 |            |       |
| Evaluating the efficacy and adherence of administration of a PCSK9 inhibitor Alirocumab in Aboriginal participants with hypercholesterolaemia                                               | 2016 | Australia | Aboriginal                                    | Cardiovascular Disease | Drug        | All    | 18 Years and older  | No published results | Randomized, Parallel Assignment | Not stated | Other |
| Exenatide -LAR in addition to standard care in Indigenous Australians with type 2 diabetes and effect on glycaemic control                                                                  | 2016 | Australia | Indigenous                                    | Diabetes               | Drug        | All    | 18 Years and older  | 37                   | Randomized                      | Not stated | Other |
| Hospitalised Pneumonia With Extended Treatment (HOPE) Study                                                                                                                                 | 2016 | Australia | Indigenous                                    | Respiratory disease    | Drug        | All    | 3 Months to 5 Years | Not completed        | Randomized, Parallel Assignment | Not stated | Other |
| Is opportunistic screening appropriate for identifying arrhythmias and establishing effective clinical pathways for Aboriginal Australians?                                                 | 2016 | Australia | Aboriginal and Torres Strait Islander peoples | Cardiovascular Disease | Screening   | All    | 45 Years and older  | No published results | Non-randomized, Single group    | Yes        | Other |
| Aboriginal and non-Aboriginal women perpetrators of violence: a trial of a prison-based intervention (Beyond Violence)                                                                      | 2017 | Australia | Aboriginal                                    | Mental illness         | Behavioral  | Female | 18 Years and older  | No published results | Non-randomized                  | Not stated | NHMRC |
| Comparing the effectiveness and safety of two treatments (OZURDEX® intravitreal implant versus Avastin®) for diabetic eye disease in adult Indigenous patients living in Western Australia. | 2017 | Australia | Indigenous                                    | Diabetes               | Drug        | All    | 18 Years and older  | No published results | Randomized, Parallel Assignment | Not stated | Other |
| Evaluation of a community-based assertive follow-up suicide prevention program for people who have attempted suicide or are at high risk of suicide                                         | 2017 | Australia | Indigenous                                    | Mental illness         | Other       | All    | 16 Years and older  | No published results | Non-randomized                  | Yes        | Other |
| Managing chronic lung disease in Aboriginal communities: the Breathe Easy Walk Easy-Lungs for Life (BE WELL) project                                                                        | 2017 | Australia | Aboriginal                                    | Respiratory disease    | Combination | All    | 40 to 90 Years      | Not completed        | Non-randomized, Single group    | Yes        | NHMRC |
| The effectiveness and acceptance of eye movement desensitisation and reprocessing (EMDR) from a                                                                                             | 2017 | Australia | Aboriginal and Torres Strait Islander         | Mental illness         | Other       | All    | 18 to 70 Years      | No data obtained     | Non-randomized, Single Group    | Yes        | HRC   |

|                                                                                                                                                                                         |      |           |                                          |                        |             |        |                       |                      |                                 |            |       |
|-----------------------------------------------------------------------------------------------------------------------------------------------------------------------------------------|------|-----------|------------------------------------------|------------------------|-------------|--------|-----------------------|----------------------|---------------------------------|------------|-------|
| remote Aboriginal Australian community perspective.                                                                                                                                     |      |           |                                          |                        |             |        |                       |                      |                                 |            |       |
| Wellbeing Intervention for Chronic Kidney Disease (WICKD): A Trial of the Aboriginal and Islander Mental Health Initiative (AIMhi) Stay Strong App.                                     | 2017 | Australia | Aboriginal or Torres Strait Islander.    | Mental illness         | Device      | All    | 18 Years and older    | No published results | Randomized                      | Yes        | NHMRC |
| A model of culturally-informed integration of diabetic retinopathy screening and diabetes education assessment in Indigenous primary care settings.                                     | 2018 | Australia | Indigenous                               | Diabetes               | Screening   | All    | 18 Years and older    | No published results | Non-randomized, Single Group    | Yes        | Other |
| A pilot trial of a smartphone application to support the mental health of young apprentices                                                                                             | 2018 | Australia | Aboriginal and Torres Strait             | Mental illness         | Behavioral  | All    | 16 to 30 Years        | No published results | Non-Randomized, Single Group    | Not stated | Other |
| A randomised controlled trial to determine if use of a Bronchiectasis Action Management Plans (BAMP) compared to usual care improves clinical outcomes in children with bronchiectasis. | 2018 | Australia | Aboriginal and/or Torres Strait Islander | Respiratory Disease    | Other       | All    | 18 Years and older    | Not completed        | Randomized, Parallel Assignment | Not stated | NHMRC |
| Adapting Compassion Focused Therapy for Groups with Aboriginal and Torres Strait Islander Clients                                                                                       | 2018 | Australia | Aboriginal and Torres Strait Islander    | Mental illness         | Behavioral  | All    | 19 Years and older    | No published results | Non-Randomized, Single Group    | Yes        | Other |
| Community Intervention to Reduce Tobacco Use in Pregnant Women                                                                                                                          | 2018 | Australia | Aboriginal                               | Mental illness         | Combination | Female | 16 Years and older    | No published results | Non-randomized, Single Group    | Yes        | Other |
| Electronic risky health behaviour and mental health screening for New Zealand youth aged 12 - 24 years in primary health care.                                                          | 2018 | Australia | Maori                                    | Mental illness         | Screening   | All    | 16 to 65 Years        | Not completed        | Randomized, Parallel Assignment | Yes        | NHMRC |
| Integrating Pharmacists within Aboriginal Community Controlled Health Services to improve Chronic Disease Management Project                                                            | 2018 | Australia | Aboriginal                               | Cardiovascular Disease | Other       | All    | 18 Years and older    | No published results | Non-randomized                  | Yes        | Other |
| Management of dental decay in young Aboriginal children                                                                                                                                 | 2018 | Australia | Aboriginal                               | Dental Disease         | Behavioral  | All    | 72 months and younger | Not completed        | Randomized, Parallel Assignment | Yes        | NHMRC |

|                                                                                                                                                                                                             |      |           |                                       |                        |             |        |                    |                      |                                         |            |       |
|-------------------------------------------------------------------------------------------------------------------------------------------------------------------------------------------------------------|------|-----------|---------------------------------------|------------------------|-------------|--------|--------------------|----------------------|-----------------------------------------|------------|-------|
| Yedding Gaur (Good Heart): Feasibility of an Aboriginal and Torres Strait Islander female Cardiac Rehabilitation program delivered in a non-Indigenous health service.                                      | 2018 | Australia | Indigenous                            | Cardiovascular Disease | Combination | Female | 18 Years and older | No published results | Non-randomized, Single Group            | Yes        | Other |
| Improving self management of blood sugar control in people with Type 2 Diabetes.                                                                                                                            | 2019 | Australia | Indigenous                            | Diabetes               | Combination | All    | 18 Years and older | Not completed        | Randomized, Parallel Assignment         | Not stated | Other |
| Indigenous Model of Mental Health Care                                                                                                                                                                      | 2019 | Australia | Indigenous                            | Mental illness         | Other       | All    | 18 Years and older | No published results | Randomized, Parallel Assignment         | Yes        | NHMRC |
| Prevention of Diabetes Progression in Primary Care through Shared Medical Appointments                                                                                                                      | 2019 | Australia | Aboriginal                            | Diabetes               | Behavioral  | All    | 18 to 65 Years     | Not completed        | Randomized, Parallel Assignment         | Not stated | NHMRC |
| We Can Do This: Web-based therapeutic intervention for reducing methamphetamine use amongst Aboriginal and Torres Strait Islander people: Randomised wait-list control Trial                                | 2019 | Australia | Aboriginal and Torres Strait Islander | Mental illness         | Behavioral  | All    | 16 Years and older | Not completed        | Randomized, Parallel Assignment         | Yes        | NHMRC |
| Community screening of participants across community pharmacies detecting asymptomatic clinical markers or risk factors associated with cardiovascular disease and chronic disease.                         | 2019 | Australia | Aboriginal or Torres strait Islander  | Cardiovascular Disease | Screening   | All    | 35-74 Years        | Not completed        | Randomized                              | Not stated | Other |
| Standing Tall with Our Mob Program (STOMP) pilot trial to improve mobility, balance, physical activity, cognitive function and psychological well-being with older people in an urban Aboriginal community. | 2019 | Australia | Aboriginal or Torres strait Islander  | Mental illness         | Behavioral  | All    | 45 Years and older | No published results | Randomized, Parallel Assignment         | Not stated | NHMRC |
| Yawardani Jan-ga (Horses helping healing in Yawuru language): Using equine-assisted learning to improve the social and emotion wellbeing of Aboriginal young people and prevent suicide                     | 2019 | Australia | Aboriginal                            | Mental illness         | Behavioral  | All    | 6-25 Years         | Not completed        | Non-randomized, Single group assignment | Not stated | Other |

|                                                                                                                                                                       |      |           |                                                     |                     |            |        |                           |                                  |                                                              |            |       |
|-----------------------------------------------------------------------------------------------------------------------------------------------------------------------|------|-----------|-----------------------------------------------------|---------------------|------------|--------|---------------------------|----------------------------------|--------------------------------------------------------------|------------|-------|
| A Pilot Study using Non-Contact Smartphone Cough Sound Recordings to Screen for Chronic Obstructive Pulmonary Disease in an Indigenous Australian Adult Population    | 2020 | Australia | Indigenous                                          | Respiratory Disease | Screening  | All    | 22 Years and older        | Not completed                    | Non-Randomized                                               | Not stated | Other |
| Talking about Aboriginal Gambling: Examining the effectiveness of Facebook groups to reduce gambling harm within Aboriginal communities in New South Wales, Australia | 2020 | Australia | Aboriginal                                          | Mental illness      | Behavioral | All    | 18 Years and older        | Not completed                    | Randomized                                                   | Yes        | Other |
| The Aboriginal Youth Mentorship Program                                                                                                                               | 2010 | Canada    | Aboriginal                                          | Diabetes            | Behavioral | All    | 8 to 11 Years             | 246                              | Non-Randomized, Crossover Assignment                         | Yes        | Other |
| Circle of Life. Improving Capacity of Swampy Cree Community Members to Recognize People at Risk for Suicide                                                           | 2011 | Canada    | First Nations                                       | Mental illness      | Behavioral | All    | 16 Years and older        | 55                               | Randomized, Parallel Assignment  Primary Purpose: Prevention | Yes        | CIHR  |
| Point of Care HbA1c as a Screening Test for Type 2 Diabetes in First Nations                                                                                          | 2011 | Canada    | First Nations                                       | Diabetes            | Procedure  | All    | 14 Years and older        | 258                              | Single Group Assignment                                      | Yes        | CIHR  |
| Preventing Early Childhood Caries in Indigenous Children: the Baby Teeth Talk Study                                                                                   | 2011 | Canada    | Indigenous                                          | Dental disease      | Other      | Female | Child, Adult, Older Adult | 544                              | Randomized, Parallel Assignment                              | Yes        | CIHR  |
| Detecting and Treating High Blood Pressure in Aboriginal Population and Low and Middle Income Countries                                                               | 2012 | Canada    | Indigenous Canadian and Rural Tanzanian communities | Hypertension        | Other      | All    | 18 to 90 Years            | 243                              | Randomized, Parallel Assignment                              | Not stated | CIHR  |
| Healthy Moms, Healthy Babies                                                                                                                                          | 2012 | Canada    | First Nations                                       | Diabetes            | Device     | Female | 18 Years and older        | 18                               | Non-Randomized, Parallel Assignment                          | Not stated | Other |
| The Cedar Project: Impact of mHealth for HIV Prevention Among Young Indigenous People Who Use Illicit Drugs                                                           | 2014 | Canada    | Indigenous                                          | Mental illness      | Behavioral | All    | 19 Years and older        | 131                              | Randomized, Parallel Assignment                              | Yes        | CIHR  |
| The Role and Effectiveness of Diabetes Coaches in British Columbia                                                                                                    | 2014 | Canada    | Aboriginal                                          | Diabetes            | Behavioral | All    | 19 to 80 Years            | No data on Indigenous enrollment | Single Group Assignment                                      | Yes        | Other |
| Diabetes Foot Care Clinical Pathway - Orpyx Medical Technologies                                                                                                      | 2016 | Canada    | First Nations                                       | Diabetes            | Device     | All    | 18 Years                  | No published results             | Randomized, Parallel Assignment                              | Not stated | Other |

|                                                                                                                                                                                                                 |      |             |                          |                        |             |        |                    |                                  |                                  |            |       |
|-----------------------------------------------------------------------------------------------------------------------------------------------------------------------------------------------------------------|------|-------------|--------------------------|------------------------|-------------|--------|--------------------|----------------------------------|----------------------------------|------------|-------|
|                                                                                                                                                                                                                 |      |             |                          |                        |             |        | and older          |                                  |                                  |            |       |
| A Randomized Controlled Trial of a Pre-Transplant Education Intervention                                                                                                                                        | 2018 | Canada      | First Nations            | Kidney Disease         | Behavioral  | All    | 0 to 18 Years      | Not completed                    | Randomized, Parallel Assignment  | Yes        | Other |
| Smartphone-enabled Health Coaching Intervention for Youth Diagnosed With Major Depressive Disorders                                                                                                             | 2018 | Canada      | First Nations            | Mental illness         | Behavioral  | All    | 18 to 30 Years     | Not completed                    | Randomized, Parallel Assignment  | Not stated | Other |
| Improving Adherence using Combination Therapy                                                                                                                                                                   | 2010 | New Zealand | Maori                    | Cardiovascular Disease | Drug        | All    | 18 to 80 Years     | 257                              | Randomized, Parallel Assignment  | Not stated | HRC   |
| Heart Exercise And Remote Technologies Trial                                                                                                                                                                    | 2011 | New Zealand | Maori                    | Cardiovascular Disease | Combination | All    | 18 Years and older | No data obtained                 | Randomized, Parallel Assignment  | Not stated | HRC   |
| Prospective randomised controlled trial comparing the efficacy of laparoscopic Roux-en-Y gastric bypass versus laparoscopic sleeve gastrectomy for the management of type 2 diabetes mellitus in obese patients | 2011 | New Zealand | Maori and Pacific Island | Diabetes               | Procedure   | All    | 20 to 50 Years     | 30                               | Randomized, Parallel Assignment  | Not stated | Other |
| The effect of an oral health education program for mothers and fluoride treatment on oral health in Indigenous Maori children                                                                                   | 2011 | New Zealand | Maori                    | Dental Disease         | Behavioral  | Female | 16 Years and older | 222                              | Randomized, Parallel Assignment  | Yes        | HRC   |
| The NATINATI Study: A single intervention to compare the effects of hazelnut consumption on the acceptance and cardiovascular disease risk factors among Maori and European participants.                       | 2011 | New Zealand | Maori and European       | Cardiovascular Disease | Behavioral  | All    | 18 to 40 Years     | 20                               | Non-randomized, Single Group     | Not stated | Other |
| The Nuts2 Study: The effect of daily consumption of raw versus roasted/salted hazelnuts on Cardiovascular disease risk factors and acceptability in Maori and European populations                              | 2011 | New Zealand | Maori and European       | Cardiovascular Disease | Behavioral  | All    | 18 to 65 Years     | No data on Indigenous enrollment | Randomized, Crossover Assignment | Not stated | Other |
| Antibiotics for bronchiectasis exacerbations in children - The Bronchiectasis Exacerbation Study (Study 1).                                                                                                     | 2012 | New Zealand | Indigenous               | Respiratory Disease    | Drug        | All    | 19 years and below | 88                               | Randomized, Parallel Assignment  | Not stated | NHMRC |



|                                                                                                                                            |      |             |                          |                        |            |     |                    |     |                                         |            |                  |
|--------------------------------------------------------------------------------------------------------------------------------------------|------|-------------|--------------------------|------------------------|------------|-----|--------------------|-----|-----------------------------------------|------------|------------------|
| Antibiotics for treatment of bronchiectasis exacerbations in children - The Bronchiectasis Exacerbation Study (Study 2).                   | 2012 | New Zealand | Indigenous               | Respiratory Disease    | Drug       | All | 19 years and below | 70  | Randomized, Parallel Assignment         | Not stated | NHMRC            |
| Safety and efficacy of high dose allopurinol in the management of gout: a randomised interventional study                                  | 2012 | New Zealand | Maori and Pacific Island | Arthritis              | Drug       | All | 18 Years and older | 77  | Randomized, Parallel Assignment         | Not stated | HRC              |
| Safety and efficacy of immediate versus delayed allopurinol treatment for the prevention of gout flares in pacific, maori and other people | 2012 | New Zealand | Maori and Pacific people | Arthritis              | Drug       | All | 18 to 75 Years     | 20  | Randomized, Parallel Assignment         | Not stated | Other            |
| The effect of a 12-week exercise and lifestyle management programme on cardiac risk reduction: A pilot using a kaupapa Maori philosophy    | 2012 | New Zealand | Maori                    | Cardiovascular Disease | Behavioral | All | 18 Years and older | 9   | Non-randomized                          | Not stated | Other            |
| YourCall Study: The effectiveness of text messaging to address hazardous drinking among trauma patients                                    | 2012 | New Zealand | Maori and Pacific        | Mental illness         | Behavioral | All | 16 to 69 Years     | 202 | Randomized                              | Yes        | HRC              |
| Non-randomised pilot study of a text message self-management support programme for people with diabetes                                    | 2013 | New Zealand | Maori                    | Diabetes               | Behavioral | All | 16 to 65 Years     | 18  | Non-randomized, Single Group            | Not stated | Other            |
| Strengthening health literacy among Indigenous people living with cardiovascular disease, their families, and health care providers        | 2013 | Multiple    | Indigenous               | Cardiovascular Disease | Behavioral | All | 20 Years and older | 171 | Non-randomized, Single group            | Yes        | HRC, NHMRC, CIHR |
| Do Defects in the Innate Immune System Contribute to Non-Cystic Fibrosis Bronchiectasis in Maori and Pacific Island Children?              | 2014 | New Zealand | Maori and Pacific Island | Respiratory Disease    | Screening  | All | 0 to 15 years      | 49  | Non-randomized, Single Group allocation | Not stated | Other            |
| A supervised toothbrushing intervention trial in Northland New Zealand school children                                                     | 2015 | New Zealand | Maori                    | Dental Disease         | Behavioral | All | 10 to 13 Years     | 222 | Non-randomized, Quasi-experimental      | Not stated | Other            |
| Diabetes text message self management support                                                                                              | 2015 | New Zealand | Maori and Pacific        | Diabetes               | Behavioral | All | 16 Years and older | 72  | Randomized, Parallel Assignment         | Not stated | HRC              |

|                                                                                                                                                                                                                                                                                                                                               |      |             |                          |                        |             |     |                    |                      |                                     |            |       |
|-----------------------------------------------------------------------------------------------------------------------------------------------------------------------------------------------------------------------------------------------------------------------------------------------------------------------------------------------|------|-------------|--------------------------|------------------------|-------------|-----|--------------------|----------------------|-------------------------------------|------------|-------|
| Effectiveness of problem gambling interventions in a service setting: A pragmatic randomised clinical trial                                                                                                                                                                                                                                   | 2015 | New Zealand | Maori                    | Mental illness         | Behavioral  | All | 18 Years and older | No published results | Randomized, Parallel Assignment     | Yes        | Other |
| Efficacy of a kaupapa Maori approach, within an exercise and lifestyle programme, on cardiovascular disease risk                                                                                                                                                                                                                              | 2015 | New Zealand | Maori                    | Cardiovascular Disease | Behavioral  | All | 18 Years and older | No published results | Non-randomized, Single group        | Yes        | Other |
| Implanted (brain) Stimulators to Augment stroke Rehabilitation Therapy (iSTART trial)                                                                                                                                                                                                                                                         | 2016 | New Zealand | Maori and Pacific Island | Cardiovascular Disease | Device      | All | 18 Years and older | No published results | Randomized                          | Not stated | Other |
| Ka Mau Te Wehi: Culturally appropriate weight Loss intervention for Maori and Pacific people of New Zealand                                                                                                                                                                                                                                   | 2016 | New Zealand | Maori and Pacific people | Cardiovascular Disease | Combination | All | 16 Years and older | 165                  | Non-randomized, Parallel Assignment | Not stated | Other |
| The effect of aerobic exercise training on cardiovascular function in aged adults with and without type 2 diabetes                                                                                                                                                                                                                            | 2016 | New Zealand | Maori and Pacific Island | Diabetes               | Behavioral  | All | 35 to 80 Years     | Not completed        | Non-randomized, Parallel Assignment | Not stated | HRC   |
| Acceptability and utility of electronic screener, YouthCHAT (Youth Version Case-finding Help Assessment Tool), and its comparison with the Home, Education, Eating, Activities, Drugs and Alcohol, Sexuality, Suicide/Depression, Safety (HEEADSSS) assessment. for young people with long-term physical conditions and high school students. | 2016 | New Zealand | Maori and Pacific Island | Mental illness         | Screening   | All | 13-18 Years        | 104                  | Randomized, Crossover Assignment    | Not stated | Other |
| Efficacy of a health and wellness coaching program for the prevention of cardiovascular disease and stroke in New Zealand adults                                                                                                                                                                                                              | 2016 | New Zealand | Maori and Pasifika       | Cardiovascular Disease | Behavioral  | All | 35 Years and older | 160                  | Randomized, Parallel Assignment     | Not stated | Other |
| BetaMe. An innovative management of diabetes and prediabetes with a comprehensive digital health programme: a randomised controlled trial.                                                                                                                                                                                                    | 2017 | New Zealand | Maori and Pacific        | Diabetes               | Combination | All | 18 to 75 Years     | No published results | Randomized, Parallel Assignment     | Yes        | HRC   |
| Can a 'take charge' intervention reduce incidence of repeat acute exacerbation of chronic obstructive                                                                                                                                                                                                                                         | 2017 | New Zealand | Maori and Pacific Island | Respiratory disease    | Combination | All | 18 Years and older | No published results | Randomized, Parallel Assignment     | Not stated | HRC   |

|                                                                                                                                                                                                                              |      |             |                          |                        |             |        |                    |                      |                                  |            |       |
|------------------------------------------------------------------------------------------------------------------------------------------------------------------------------------------------------------------------------|------|-------------|--------------------------|------------------------|-------------|--------|--------------------|----------------------|----------------------------------|------------|-------|
| pulmonary disease? A feasibility study                                                                                                                                                                                       |      |             |                          |                        |             |        |                    |                      |                                  |            |       |
| Can better sleep health during pregnancy regulate depressive symptoms in women with a previous history of depression?                                                                                                        | 2017 | New Zealand | Maori                    | Mental illness         | Behavioral  | Female | 16 Years and older | 22                   | Non-Randomized, Single Group     | Yes        | Other |
| Community exercise and education to improve blood glucose control, physical health outcomes, and well-being for people living with type II diabetes.                                                                         | 2017 | New Zealand | Maori and Pacific        | Diabetes               | Combination | All    | 35 Years and older | No published results | Randomized, Parallel Assignment  | Not stated | HRC   |
| Fibre structure of whole grains in blood glucose response                                                                                                                                                                    | 2017 | New Zealand | Maori and Pacific Island | Diabetes               | Behavioral  | All    | 18 to 75 Years     | 30                   | Randomized, Crossover Assignment | Not stated | Other |
| He Kura: Improving Asthma Support for School Children                                                                                                                                                                        | 2017 | New Zealand | Maori                    | Respiratory disease    | Behavioral  | All    | 5 to 13 Years      | No published results | Non-randomized, Single group     | Yes        | HRC   |
| Walking to better health after stroke                                                                                                                                                                                        | 2017 | New Zealand | Maori                    | Cardiovascular Disease | Combination | All    | 18 Years and older | 1                    | Randomized, Parallel Assignment  | Not stated | Other |
| Whakapai e Te Ara Ha: Asthma Self-Management Programme for the whanau of tamariki Maori with Asthma                                                                                                                          | 2017 | New Zealand | Maori                    | Respiratory disease    | Combination | All    | All Years          | No published results | Randomized, Parallel Assignment  | Yes        | HRC   |
| A novel model of care for Maori with chronic airways disease                                                                                                                                                                 | 2018 | New Zealand | Maori                    | Respiratory Disease    | Combination | All    | 16 Years and older | No published results | Non-Randomized, Single Group     | Not stated | Other |
| Mana Tu: how effective is a whanau ora approach to improve HbA1C levels in people with poorly controlled type 2 diabetes mellitus                                                                                            | 2018 | New Zealand | Maori and/or Pacific     | Diabetes               | Behavioral  | All    | 18 to 70 Years     | No published results | Randomized, Parallel Assignment  | Yes        | HRC   |
| OL@-OR@ trial: a cluster-randomised controlled trial to evaluate a co-designed, culturally-tailored, lifestyle-support mobile health (mHealth) tool, which includes an app and website for Maori and Pasifika in New Zealand | 2018 | New Zealand | Maori or Pasifika group  | Cardiovascular Disease | Combination | All    | 18 Years and older | 1451                 | Randomized, Parallel Assignment  | Yes        | Other |
| MyTeen – Increasing competence and mental health literacy: A mobile-                                                                                                                                                         | 2018 | New Zealand | Maori and Pacific Island | Mental illness         | Behavioral  | All    | 18 Years and older | 47                   | Randomized, Parallel Assignment  | Not stated | Other |

|                                                                                                                                                                                                                            |      |             |                     |                        |            |      |                    |                      |                                     |            |       |
|----------------------------------------------------------------------------------------------------------------------------------------------------------------------------------------------------------------------------|------|-------------|---------------------|------------------------|------------|------|--------------------|----------------------|-------------------------------------|------------|-------|
| based intervention to support parents of teenagers                                                                                                                                                                         |      |             |                     |                        |            |      |                    |                      |                                     |            |       |
| Testing an Integrated Care Model for Maori Men with Pre-diabetes, cardio vascular disease (CVD) risk, and/or obesity                                                                                                       | 2018 | New Zealand | Maori               | Cardiovascular Disease | Behavioral | Male | 30-55 Years        | Not completed        | Non-randomized, Parallel Assignment | Not stated | Other |
| Evaluation of an app to support emotional wellbeing of adolescents experiencing depression and/or anxiety                                                                                                                  | 2019 | New Zealand | Maori and Pasifika  | Mental illness         | Device     | All  | 11 to 16 Years     | No published results | Randomized, Parallel Assignment     | Yes        | Other |
| Game for Health: Development of a Prototype eHealth Intervention to Treat Anxiety in Young People with Long-term Physical Conditions                                                                                       | 2019 | New Zealand | Maori               | Mental illness         | Behavioral | All  | 13 to 18 Years     | No published results | Non-randomized, Single group        | Not stated | Other |
| Kia ora ai te Iwi - Whanau Oranga (wellbeing of the whole family): Supporting Maori with cultural-adapted psychological interventions to cope with the impact of Mate Wareware (Dementia).                                 | 2019 | New Zealand | Maori               | Mental illness         | Behavioral | All  | 5 Years and above  | No published results | Non-randomized                      | Yes        | Other |
| Salt ALTERNatives Study (SALTS): A smartphone app and dietary alternative salt to lower blood pressure for adults with high blood pressure                                                                                 | 2019 | New Zealand | Maori               | Hypertension           | Behavioral | All  | 18 Years and older | Not completed        | Randomized, Parallel Assignment     | Not stated | HRC   |
| WORTH (which one is right here?): Randomised, crossover study to identify predictive baseline characteristics of response to pioglitazone or vildagliptin as second or third line therapy in patients with Type 2 diabetes | 2019 | New Zealand | Maori and Pacific   | Diabetes               | Drug       | All  | 18 to 80 Years     | Not completed        | Randomized, Crossover Assignment    | Yes        | HRC   |
| Understanding the uptake of a mobile phone application (app) to support youth wellbeing and resilience.                                                                                                                    | 2019 | New Zealand | Maori               | Mental illness         | Behavioral | All  | 12-22 Years        | No published results | Non-randomized, Single group        | Not stated | Other |
| A community group to improve loneliness in older adults                                                                                                                                                                    | 2020 | New Zealand | Maori and non-Maori | Mental illness         | Other      | All  | 65 Years and older | Not completed        | Randomized, Parallel Assignment     | Yes        | NHMRC |
| An randomised control trial of a cognitive behavioural therapy mobile health app                                                                                                                                           | 2020 | New Zealand | Maori and Pacific   | Mental illness         | Behavioral | All  | 18 Years           | Not completed        | Randomized, Parallel Assignment     | Not stated | HRC   |

|                                                                                                                                   |      |             |                           |                        |             |        |                    |                      |                                  |            |       |  |
|-----------------------------------------------------------------------------------------------------------------------------------|------|-------------|---------------------------|------------------------|-------------|--------|--------------------|----------------------|----------------------------------|------------|-------|--|
| [Manaaki] aimed at reducing gambling symptom severity and supporting people experiencing gambling problems.                       |      |             |                           |                        |             |        | and older          |                      |                                  |            |       |  |
| The effect of health information distributed to people with knee osteoarthritis through community pharmacies: a feasibility study | 2020 | New Zealand | Maori or a Pacifica       | Arthritis              | Combination | All    | 18 Years and older | No published results | Randomized, Parallel Assignment  | Not stated | HRC   |  |
| Drum-Assisted Therapy for Native Americans                                                                                        | 2010 | US          | Native American           | Mental illness         | Behavioral  | All    | 18 to 65 Years     | 10                   | Randomized, Parallel Assignment  | Yes        | Other |  |
| Preventing Caries in Preschoolers: Testing a Unique Service Delivery Model in American Indian Head Start Programs                 | 2011 | US          | American Indian           | Dental disease         | Combination | All    | 3 to 5 Years       | 1016                 | Randomized, Parallel Assignment  | Yes        | NIH   |  |
| Promoting Behavioral Change for Oral Health in American Indian Mothers and Children                                               | 2011 | US          | American Indian           | Dental disease         | Behavioral  | All    | 15 to 44 Years     | 1158                 | Randomized, Parallel Assignment  | Yes        | NIH   |  |
| The Hanapū Study: Incentivized Partnerships to Reduce Diabetes Disparities                                                        | 2011 | US          | Native and Pacific People | Diabetes               | Other       | All    | 18 Years and older | 107                  | Randomized, Parallel Assignment  | Yes        | NIH   |  |
| Together on Diabetes Study: Evaluation of a Pilot Diabetes Prevention and Management Program for American Indian Youth            | 2011 | US          | American Indian           | Diabetes               | Behavioral  | All    | 10 to 19 Years     | 478                  | Single Group Assignment          | Not stated | Other |  |
| Antiplatelet Effects of Ticagrelor Versus Clopidogrel in American Indian Patients                                                 | 2012 | US          | American Indian           | Cardiovascular Disease | Drug        | All    | 18 Years and older | 28                   | Randomized, Crossover Assignment | Not stated | Other |  |
| Ola Hou i ka Hula: Hula and Hypertension                                                                                          | 2012 | US          | Native Hawaiians          | Hypertension           | Behavioral  | All    | 18 Years and older | 59                   | Randomized, Crossover Assignment | Yes        | NIH   |  |
| Cognitive Processing Intervention for Trauma, HIV/STI Risks, and Substance Use Among Native Women                                 | 2013 | US          | American Indian           | Mental illness         | Behavioral  | Female | 18 Years and older | 60                   | Randomized, Crossover Assignment | Not stated | NIH   |  |
| Factors Influencing Pediatric Asthma                                                                                              | 2013 | US          | American Indian           | Respiratory disease    | Behavioral  | All    | 6 to 17 Years      | 324                  | Randomized, Parallel Assignment  | Yes        | NIH   |  |

|                                                                                                                                                                                    |      |    |                                                                           |                        |             |     |                    |                                  |                                  |            |       |
|------------------------------------------------------------------------------------------------------------------------------------------------------------------------------------|------|----|---------------------------------------------------------------------------|------------------------|-------------|-----|--------------------|----------------------------------|----------------------------------|------------|-------|
| Home-base Kidney Care in Zuni Indians                                                                                                                                              | 2013 | US | Indian                                                                    | Kidney Disease         | Other       | All | 21 to 80 Years     | 125                              | Randomized, Factorial Assignment | Yes        | Other |
| Motivational Interviewing and Cognitive Behavioral Therapy-based Intervention for Cardiovascular Disease Prevention Amongst American Indians With Diabetic and Depressive Symptoms | 2013 | US | American Indian                                                           | Cardiovascular Disease | Behavioral  | All | 18 Years and older | 34                               | Randomized, Parallel Assignment  | Yes        | NIH   |
| Partnerships to Improve Lifestyle Interventions (PLI) 'Ohana Dissemination Project Partners in Care                                                                                | 2013 | US | Native Hawaiian                                                           | Diabetes               | Behavioral  | All | 18 Years and older | 47                               | Single Group Assignment          | Yes        | Other |
| Vitamin D and Type 2 Diabetes Study                                                                                                                                                | 2013 | US | American Indian, Alaska Native, Native Hawaiian or Other Pacific Islander | Diabetes               | Drug        | All | 30 Years and older | No data on Indigenous enrollment | Randomized, Parallel Assignment  | Not stated | NIH   |
| Culturally Grounded Early Substance Use Prevention for American Indian Families                                                                                                    | 2013 | US | American Indian                                                           | Mental illness         | Behavioral  | All | 10-14 Years        | 449                              | Randomized, Factorial Assignment | Not stated | Other |
| Chronic Kidney Disease Knowledge and Awareness Among American Indians                                                                                                              | 2014 | US | American Indian                                                           | Kidney Disease         | Other       | All | 21 Years and older | 70                               | Single Group Assignment          | Not stated | NIH   |
| Evaluation of an Entrepreneurship Program for American-Indian Youth                                                                                                                | 2014 | US | American Indian                                                           | Mental illness         | Behavioral  | All | 13 to 15 Years     | 393                              | Randomized, Parallel Assignment  | Yes        | Other |
| Iwankapiya-Healing: Historical Trauma Practice and Group IPT for American Indians                                                                                                  | 2014 | US | American Indian                                                           | Mental illness         | Behavioral  | All | 18 Years and older | 52                               | Randomized, Parallel Assignment  | Yes        | NIH   |
| Motivational Incentives for Alcohol Abstinence in American Indian and Native Alaskan Adults                                                                                        | 2014 | US | American Indian and Alaska Native                                         | Mental illness         | Behavioral  | All | 18 Years and older | Not completed                    | Randomized, Parallel Assignment  | Not stated | Other |
| Motivational Interviewing and Culture for Urban Native American Youth (MICUNAY)                                                                                                    | 2014 | US | Native American                                                           | Mental illness         | Combination | All | 14 to 18 Years     | 185                              | Randomized, Parallel Assignment  | Yes        | NIH   |
| Wood Smoke Interventions in Native American Populations                                                                                                                            | 2014 | US | Native Americans                                                          | Respiratory disease    | Combination | All | 55 Years and older | 156                              | Randomized, Parallel Assignment  | Yes        | NIH   |
| Wood Stove Interventions and Child Respiratory Health                                                                                                                              | 2014 | US | American Indian and Alaska Native                                         | Respiratory disease    | Combination | All | up to 5 Years      | 516                              | Randomized, Parallel Assignment  | Yes        | NIH   |

|                                                                                            |      |    |                                      |                        |            |        |                    |                      |                                        |            |       |
|--------------------------------------------------------------------------------------------|------|----|--------------------------------------|------------------------|------------|--------|--------------------|----------------------|----------------------------------------|------------|-------|
| Intertribal Talking Circle for the Prevention of Substance Abuse in Native Youth           | 2014 | US | American Indian                      | Mental illness         | Behavioral | All    | 12-55 Years        | 630                  | Randomized, Parallel Assignment        | Yes        | Other |
| Substance Use Prevention Campaign for American Indian Youth                                | 2014 | US | American Indian                      | Mental illness         | Behavioral | All    | 11-14 Years        | 528                  | Randomized, Parallel Assignment        | Yes        | Other |
| A Patient-Centered Strategy for Improving Diabetes Prevention in Urban American Indians    | 2015 | US | American Indian                      | Diabetes               | Behavioral | All    | 21 Years and older | 207                  | Randomized, Parallel Assignment Single | Yes        | Other |
| An Intervention to Increase Engagement With Hypertension Care for American Indian Patients | 2015 | US | American Indian and Alaska Native    | Hypertension           | Behavioral | All    | 18 to 100 Years    | No published results | Randomized, Parallel Assignment        | Not stated | Other |
| Biomarker Feedback to Motivate Cessation in Pregnancy                                      | 2015 | US | American Indian and Alaska Native    | Mental illness         | Behavioral | Female | 18 to 45 Years     | 60                   | Randomized, Parallel Assignment        | Yes        | Other |
| Contingency Management for the Treatment of Co-Occurring Alcohol and Drug Misuse           | 2015 | US | American Indian                      | Mental illness         | Behavioral | All    | 18 Years and older | 120                  | Randomized, Factorial Assignment       | Not stated | Other |
| Growing Resilience in Wind River Indian Reservation                                        | 2015 | US | Indigenous                           | Cardiovascular Disease | Other      | All    | 5 to 80 Years      | Not completed        | Randomized, Parallel Assignment        | Yes        | NIH   |
| Healing and Empowering Alaskan Lives Towards Healthy-Hearts Study                          | 2015 | US | Alaska Native                        | Mental illness         | Behavioral | All    | 19 Years and older | No published results | Randomized, Parallel Assignment        | Yes        | NIH   |
| Innovative Multigenerational Household Intervention to Reduce Stroke and CVD               | 2015 | US | American Indian                      | Cardiovascular Disease | Behavioral | All    | 11 Years and older | 458                  | Randomized, Parallel Assignment        | Yes        | Other |
| Yappalli - The Road to Choctaw Health                                                      | 2015 | US | Native                               | Mental illness         | Behavioral | Female | 18 Years and older | Not completed        | Randomized, Crossover Assignment       | Not stated | Other |
| The KaHOLO Project: Preventing Cardiovascular Disease in Native Hawaiians                  | 2016 | US | Native Hawaiian/Pacific Islanders    | Hypertension           | Behavioral | All    | 21 Years and older | 275                  | Randomized, Crossover Assignment       | Yes        | NIH   |
| The Development and Evaluation of the Ho'Ouna Pono Drug Prevention Curriculum              | 2016 | US | Native Hawaiian and Pacific Islander | Mental illness         | Behavioral | All    | 10-14 Years        | 486                  | Randomized, Parallel Assignment        | Not stated | Other |
| A Family-Centered Ojibwe Substance Abuse Prevention                                        | 2017 | US | American Indian                      | Mental illness         | Behavioral | All    | 8 to 10 Years      | Not completed        | Randomized, Parallel Assignment        | Yes        | Other |
| American Indian and Alaska Native Men Who Have Sex                                         | 2017 | US | American Indian and Alaska Native    | Mental illness         | Behavioral | Male   | 18 Years           | 79                   | Randomized, Parallel Assignment        | Not stated | NIH   |

|                                                                                                                 |      |    |                                                 |                        |             |        |                    |                      |                                       |            |       |  |
|-----------------------------------------------------------------------------------------------------------------|------|----|-------------------------------------------------|------------------------|-------------|--------|--------------------|----------------------|---------------------------------------|------------|-------|--|
| With Men HIV & Substance Abuse Research                                                                         |      |    |                                                 |                        |             |        | and older          |                      |                                       |            |       |  |
| An Asthma Collaboration to Reduce Childhood Asthma Disparities on the Navajo Nation                             | 2017 | US | Navajo Nation                                   | Respiratory Disease    | Behavioral  | All    | 18 Years and older | Not completed        | Non-Randomized, Sequential Assignment | Yes        | Other |  |
| Controlling Hypertension in Native American and Other Populations                                               | 2017 | US | American Indian and Alaska Native               | Hypertension           | Behavioral  | All    | 21 to 79 Years     | No published results | Randomized, Parallel Assignment       | Not stated | NIH   |  |
| Diet Intervention for Hypertension: Adaptation and Dissemination to Native Communities                          | 2017 | US | American Indians                                | Hypertension           | Behavioral  | All    | 18 Years and older | No published results | Randomized, Parallel Assignment       | Not stated | NIH   |  |
| Empaglifozin in Early Diabetic Kidney Disease                                                                   | 2017 | US | American Indian                                 | Diabetes               | Drug        | All    | 18 to 64 Years     | 0                    | Randomized, Parallel Assignment       | Not stated | NIH   |  |
| Home-Based Kidney Care in Native American's of New Mexico (HBKC)                                                | 2017 | US | Native American                                 | Kidney Disease         | Behavioral  | All    | 21 to 80 Years     | Not completed        | Randomized, Factorial Assignment      | Yes        | Other |  |
| Nxstan: A Culturally Tailored Intervention to Prevent Diabetes in American Indian Men                           | 2017 | US | American Indian                                 | Diabetes               | Behavioral  | Male   | 21 to 65 Years     | 100                  | Randomized, Parallel Assignment       | Yes        | Other |  |
| Preventing Early Childhood Obesity, Part 1: Family Spirit Nurture, 3-9 Months                                   | 2017 | US | American Indian                                 | Cardiovascular Disease | Combination | Female | 13 Years and older | 136                  | Randomized, Parallel Assignment       | Not stated | Other |  |
| Preventing HIV Among Native Americans Through the Treatment PTSD & Substance Use                                | 2017 | US | Native Americans                                | Mental illness         | Behavioral  | All    | 16 Years and older | Not completed        | Randomized, Parallel Assignment       | Yes        | NIH   |  |
| Testing Effectiveness of the Community Reinforcement Approach and Family Training (CRAFT) With American Indians | 2017 | US | American Indian                                 | Mental illness         | Behavioral  | All    | 18 Years and older | No published results | Randomized, Parallel Assignment       | Yes        | NIH   |  |
| Utilizing Traditional Practices                                                                                 | 2017 | US | American Indians and Alaska Natives             | Mental illness         | Behavioral  | All    | 18 Years and older | 62                   | Randomized, Parallel Assignment       | Yes        | NIH   |  |
| Family Listening Program: Multi-Tribal Implementation and Evaluation                                            | 2017 | US | Mescalero Apache, Jemez Pueblo and Ramah Navajo | Mental illness         | Behavioral  | All    | 8-11 Years         | No published results | Non-randomized, Parallel Assignment   | Yes        | Other |  |
| Brief Interventions for the Prevention of Suicide and the Promotion of Resilience                               | 2018 | US | American Indian                                 | Mental illness         | Behavioral  | All    | 10 to 24 Years     | Not completed        | Randomized, Sequential Assignment     | Yes        | NIH   |  |
| Caring Contacts: A Strength-based, Suicide Prevention                                                           | 2018 | US | American Indians and Alaska Natives             | Mental illness         | Behavioral  | All    | 18 Years           | Not completed        | Randomized, Parallel Assignment       | Yes        | NIH   |  |



|                                                                                                      |      |    |                                     |                        |             |        |                    |               |                                     |            |       |  |
|------------------------------------------------------------------------------------------------------|------|----|-------------------------------------|------------------------|-------------|--------|--------------------|---------------|-------------------------------------|------------|-------|--|
| Trial in 4 Native Communities                                                                        |      |    |                                     |                        |             |        | and older          |               |                                     |            |       |  |
| Chickasaw Healthy Eating Environments Research Study                                                 | 2018 | US | American Indian and Alaska Native   | Hypertension           | Behavioral  | All    | 18 Years and older | Not completed | Randomized, Parallel Assignment     | Yes        | Other |  |
| Engaging Native Hawaiian/Pacific Islanders and Activating Communities to Take Steps (ENACTS)         | 2018 | US | Native Hawaiian/Pacific Islanders   | Hypertension           | Behavioral  | All    | 18 Years and older | Not completed | Randomized, Parallel Assignment     | Not stated | NIH   |  |
| Screening for Atrial Fibrillation in Native Americans Using iPhone ECG                               | 2018 | US | Native American                     | Cardiovascular Disease | Screening   | All    | 50 to 100 Years    | Not completed | Single Group Assignment             | Not stated | Other |  |
| Strong Men, Strong Communities Diabetes Risk Reduction in American Indian Men                        | 2018 | US | American Indian                     | Diabetes               | Behavioral  | Male   | 18 to 75 Years     | Not completed | Randomized, Parallel Assignment     | Yes        | NIH   |  |
| Supporting American Indian/Alaska Native Mothers and Daughters in Reducing Gestational Diabetes Risk | 2018 | US | American Indian and Alaska Native   | Diabetes               | Behavioral  | Female | 12 to 20 Years     | 398           | Randomized, Parallel Assignment     | Yes        | NIH   |  |
| Web-based Addiction Treatment: Cultural Adaptation With American Indians                             | 2018 | US | American Indian                     | Mental illness         | Behavioral  | All    | 18 to 99 Years     | Not completed | Randomized, Single Group Assignment | Yes        | NIH   |  |
| Zero Suicide Plus KICKS                                                                              | 2018 | US | American Indian                     | Mental illness         | Behavioral  | All    | 13 to 24 Years     | Not completed | Randomized, Crossover Assignment    | Yes        | NIH   |  |
| Promoting Community Conversations About Research to End Native Youth Suicide in Rural Alaska         | 2018 | US | Native                              | Mental illness         | Behavioral  | All    | 15 Years and older | Not completed | Non-randomized, Parallel Assignment | Not stated | Other |  |
| Blood Pressure-Improving Control Among Alaska Native People" (BP-ICAN)                               | 2019 | US | Alaska Native                       | Hypertension           | Device      | All    | 18 Years and older | Not completed | Randomized, Parallel Assignment     | Not stated | Other |  |
| Native-Changing High-risk Alcohol Use and Increasing Contraception Effectiveness Study               | 2019 | US | American Indian and Alaska Native   | Mental illness         | Behavioral  | Female | 18 to 44 Years     | Not completed | Randomized, Parallel Assignment     | Not stated | Other |  |
| NCARE, Transition to Recovery                                                                        | 2019 | US | Alaska Natives or American Indians. | Mental illness         | Behavioral  | All    | 18 Years and older | Not completed | Randomized, Single Group Assignment | Not stated | NIH   |  |
| Southwest Hub for American Indian Youth Suicide Prevention Research                                  | 2019 | US | American Indian                     | Mental illness         | Combination | All    | 16 Years           | Not completed | Randomized, Factorial Assignment    | Yes        | NIH   |  |

|                                                                                                                                          |      |    |                                   |                        |             |     |                    |               |                                   |            |       |
|------------------------------------------------------------------------------------------------------------------------------------------|------|----|-----------------------------------|------------------------|-------------|-----|--------------------|---------------|-----------------------------------|------------|-------|
|                                                                                                                                          |      |    |                                   |                        |             |     | and older          |               |                                   |            |       |
| Wa'Kan Ye'Zah: Enhancing Caregivers' and Children's Well-being Through an Evidence-based and Culturally Informed Prevention Intervention | 2019 | US | Native Americans                  | Mental illness         | Behavioral  | All | 18 Years and older | Not completed | Randomized, Parallel Assignment   | Yes        | NIH   |
| Cooking for Health                                                                                                                       | 2020 | US | American Indian                   | Diabetes               | Behavioral  | All | 18 to 60 Years     | Not completed | Randomized, Parallel Assignment   | Not stated | NIH   |
| Diabetes Nutrition Education for American Indian and Alaska Native Communities                                                           | 2020 | US | American Indian and Alaska Native | Diabetes               | Behavioral  | All | 18 Years and older | Not completed | Randomized, Sequential Assignment | Not stated | Other |
| Evaluation of Thiw'he Gluw'Akapi Substance Use Prevention Program                                                                        | 2020 | US | American Indian                   | Mental illness         | Behavioral  | All | 10 to 85 Years     | Not completed | Randomized, Factorial Assignment  | Yes        | Other |
| Pilot of IMPACT Intervention at the University of New Mexico                                                                             | 2020 | US | American Indian                   | Kidney Disease         | Behavioral  | All | 18 Years and older | Not completed | Randomized, Parallel Assignment   | Not stated | Other |
| Reducing Diabetes Risk Factors in American Indian Children: Tribal Turning Point                                                         | 2020 | US | American Indian                   | Cardiovascular Disease | Combination | All | 7 to 10 Years      | Not completed | Randomized, Parallel Assignment   | Not stated | NIH   |
| Suicide in Urban Natives: Detection and Networks to Combat Events                                                                        | 2020 | US | American Indian and Alaska Native | Mental illness         | Behavioral  | All | 18 to 34 Years     | Not completed | Randomized, Parallel Assignment   | Not stated | NIH   |

**Table S2. Summary of randomly selected studies.**

| Title                                                                                                                                                                                                        | Conditions             | Interventions  | Actual Enrolled | Indigenous Enrolled | *Indigenous Population           | Location  | Study Designs                        | Funding            | Start Year |
|--------------------------------------------------------------------------------------------------------------------------------------------------------------------------------------------------------------|------------------------|----------------|-----------------|---------------------|----------------------------------|-----------|--------------------------------------|--------------------|------------|
| "Wiihabilitation": Can active gaming systems be used to improve recovery after stroke?                                                                                                                       | Cardiovascular Disease | Rehabilitation | 30              |                     | Race and Ethnicity Not Collected | Australia | Randomized, Parallel Assignment      | NHMRC              | 2010       |
| A Study to Evaluate the Potential Role of Mesenchymal Stem Cells in the Treatment of Idiopathic Pulmonary Fibrosis                                                                                           | Respiratory Disease    | Other          | 8               |                     | Race and Ethnicity Not Collected | Australia | Single Group Assignment              | Hospital           | 2010       |
| Australian study of the effects of strict potassium restriction on nerve function in patients with chronic kidney disease                                                                                    | Kidney Disease         | Other          | 47              |                     | Race and Ethnicity Not Collected | Australia | Randomized, Factorial Assignment     | NHMRC              | 2010       |
| Getting better at chronic care in North Queensland: A cluster randomized trial of patient-centred care delivered by Indigenous health professionals to Indigenous clients.                                   | Diabetes               | Behavioral     | 213             | 0                   |                                  | Australia | Non-randomized, Crossover Assignment | NHMRC              | 2010       |
| Impact of routine screening and feedback on post-stroke depression                                                                                                                                           | Mental Illness         | Screening      | 124             |                     | Race and Ethnicity Not Collected | Australia | Randomized, Parallel Assignment      | Industry           | 2010       |
| Investigating Magnetic Seizure Therapy in Major Depressive Disorder.                                                                                                                                         | Mental Illness         | Device         | 40              |                     | Race and Ethnicity Not Collected | Australia | Randomized, Parallel Assignment      | NHMRC              | 2010       |
| Randomised controlled trial of two implementation methods of the e-couch Anxiety and Worry program in an adolescent school-based population.                                                                 | Mental Illness         | Behavioral     | 1767            | 53                  | Indigenous                       | Australia | Randomized, Parallel Assignment      | Industry           | 2010       |
| The CREDO Research Project: Can mood problems be prevented and treated using e-health interventions in patients being treated for cardiovascular disease?                                                    | Mental Illness         | Other          | 562             |                     | Race and Ethnicity Not Collected | Australia | Randomized, Parallel Assignment      | Industry           | 2010       |
| Treatment of Bifurcation Lesions With The BIOTRONIK Pantera Lux Drug Eluting Balloon                                                                                                                         | Cardiovascular Disease | Device         | 35              |                     | Race and Ethnicity Not Collected | Australia | Single Group Assignment              | Industry           | 2010       |
| A randomised control trial of the impact of the implementation of case management compared with usual care in the transition of young adults with type 1 diabetes mellitus from paediatric to adult services | Diabetes               | Other          | 120             |                     | Not Available                    | Australia | Randomized, Parallel Assignment      | Research Institute | 2011       |
| A Randomised Controlled Trial of a Marinova Seaweed Extract on Osteoarthritis                                                                                                                                | Arthritis              | Other          | 130             |                     | Not Available                    | Australia | Randomized, Parallel Assignment      | Industry           | 2011       |
| Cognitive Behavioural Therapy for Vestibular Migraine                                                                                                                                                        | Mental Illness         | Behavioral     | 61              |                     | Not Available                    | Australia | Randomized, Parallel Assignment      | Hospital           | 2011       |
| Does cholecalciferol (vitamin D3) improve patient-level outcomes for people with chronic kidney disease on dialysis                                                                                          | Kidney Disease         | Drug           | 60              |                     | Race and Ethnicity Not Collected | Australia | Randomized, Parallel Assignment      | Industry           | 2011       |
| Intravitreal Aflibercept Injection in Vision Impairment Due to DME                                                                                                                                           | Diabetes               | Procedure      | 404             |                     | Race and Ethnicity Not Collected | Australia | Randomized, Crossover Assignment     | Industry           | 2011       |

|                                                                                                                                                                                                                   |                        |                |       |      |  |                                       |           |                                           |                    |      |
|-------------------------------------------------------------------------------------------------------------------------------------------------------------------------------------------------------------------|------------------------|----------------|-------|------|--|---------------------------------------|-----------|-------------------------------------------|--------------------|------|
| Mindfulness, cognitive processes and coping in chronic illness: insights from a study of joint replacement surgery                                                                                                | Arthritis              | Behavioral     | 145   |      |  | Race and Ethnicity Not Collected      | Australia | Randomized, Parallel Assignment           | Research Institute | 2011 |
| The effect of physiotherapy booster sessions on home exercise outcomes in people with knee osteoarthritis                                                                                                         | Arthritis              | Rehabilitation | 78    |      |  | Race and Ethnicity Not Collected      | Australia | Randomized, Parallel Assignment           | NHMRC              | 2011 |
| The Osteoarthritis Stem Cell Advanced Research Study                                                                                                                                                              | Arthritis              | Other          | 40    |      |  | Not Available                         | Australia | Randomized                                | Industry           | 2011 |
| The Out-and-About trial: Improving quality of life after stroke                                                                                                                                                   | Cardiovascular Disease | Behavioral     | 263   |      |  | Not Available                         | Australia | Randomized, Parallel Assignment           | NHMRC              | 2011 |
| Treatment of Cardiovascular Risk in Primary Care with Electronic Decision Support- The TORPEDO study.                                                                                                             | Cardiovascular Disease | Screening      | 38725 | 6916 |  | Aboriginal and Torres Strait Islander | Australia | Randomized, Parallel Assignment           | NHMRC              | 2011 |
| A randomised trial assessing the acceptability and effectiveness of providing generic versus tailored feedback about health risks for a high need primary care sample                                             | Cardiovascular Disease | Behavioral     | 87    | 62   |  | Aboriginal                            | Australia | Non-Randomized, Parallel Assignment       | Industry           | 2012 |
| Effect of long term consumption of Australian pork for weight loss and weight maintenance on cardiometabolic health, food cravings and cognition and psychological wellbeing in individuals with type 2 diabetes. | Diabetes               | Behavioral     | 61    |      |  | Race and Ethnicity Not Collected      | Australia | Randomized, Parallel Assignment           | Industry           | 2012 |
| Mitochondrial agents in the treatment of bipolar disorder                                                                                                                                                         | Mental Illness         | Drug           | 181   |      |  | Race and Ethnicity Not Collected      | Australia | Randomized, Parallel Assignment           | NHMRC              | 2012 |
| Sitting Time After Stroke (STARS). A phase II safety and feasibility trial of counselling sessions aimed at encouraging stroke survivors to 'move more and sit less'.                                             | Cardiovascular Disease | Behavioral     | 35    |      |  | Race and Ethnicity Not Collected      | Australia | Randomized, Parallel Assignment           | Industry           | 2012 |
| Stepping Up Study: A Cluster Randomised Controlled Trial of team-based transition to insulin in primary care compared to usual care to improve HbA1c for patients with poorly controlled type 2 diabetes          | Diabetes               | Other          | 266   |      |  | Race and Ethnicity Not Collected      | Australia | Randomized, Parallel Assignment           | NHMRC              | 2012 |
| Aged Garlic Extract for heart health: A 3-month randomised placebo-controlled trial                                                                                                                               | Hypertension           | Drug           | 100   |      |  | Race and Ethnicity Not Collected      | Australia | Randomized, Parallel Assignment           | Industry           | 2013 |
| Counseling to improve symptoms of anxiety or depression for heart transplant recipients                                                                                                                           | Mental Illness         | Behavioral     | 13    |      |  | Race and Ethnicity Not Collected      | Australia | Randomized, Parallel Assignment           | University         | 2013 |
| Home Monitoring of Chronic Disease for Aged Care                                                                                                                                                                  | Cardiovascular Disease | Device         | 287   |      |  | Race and Ethnicity Not Collected      | Australia | Non-randomized, Quasi Case-Control Design | Industry           | 2013 |
| Implementing care coordination plus early rehabilitation in high-risk chronic obstructive pulmonary disease (COPD) patients in transition from hospital to primary care                                           | Respiratory Disease    | Other          | 19    |      |  | Race and Ethnicity Not Collected      | Australia | Non-randomized                            | University         | 2013 |
| Modified SHOes for osteoARthritis of the Knee: the SHARK study                                                                                                                                                    | Arthritis              | Device         | 160   |      |  | Not Available                         | Australia | Randomized, Parallel Assignment           | NHMRC              | 2013 |

|                                                                                                                                                                                                                                   |                        |                |     |  |                                  |           |                                 |                    |      |
|-----------------------------------------------------------------------------------------------------------------------------------------------------------------------------------------------------------------------------------|------------------------|----------------|-----|--|----------------------------------|-----------|---------------------------------|--------------------|------|
| Online treatment for depression in people with diabetes: a randomised controlled trial                                                                                                                                            | Mental Illness         | Behavioral     | 91  |  | Race and Ethnicity Not Collected | Australia | Randomized, Parallel Assignment | Hospital           | 2013 |
| Online treatment for depression in people with osteoarthritis: a randomised controlled trial                                                                                                                                      | Mental Illness         | Behavioral     | 77  |  | Not Available                    | Australia | Randomized, Parallel Assignment | Hospital           | 2013 |
| Screening Education And Recognition by primary Care pPhysician of Atrial Fibrillation for prevention of stroke (SEARCH-AF II)                                                                                                     | Cardiovascular Disease | Screening      | 88  |  | Not Available                    | Australia | Single Group Assignment         | Industry           | 2013 |
| Technology That Permits Focal Dose of Antibiotics to be Delivered to Lower Limb(s) of Diabetic Patients                                                                                                                           | Diabetes               | Drug           | 15  |  | Race and Ethnicity Not Collected | Australia | Randomized, Parallel Assignment | Industry           | 2013 |
| What is the efficacy of therapist-guided internet-treatment, self-guided internet-treatment with pre-treatment contact, and purely self-guided internet-delivered for older adults (60+) with symptoms of anxiety and depression? | Mental Illness         | Behavioral     | 434 |  | Race and Ethnicity Not Collected | Australia | Randomized, Parallel Assignment | Industry           | 2013 |
| Magnesium supplements for the treatment of resistant depression                                                                                                                                                                   | Mental Illness         | Drug           | 10  |  | Not Available                    | Australia | Single Group Assignment         | University         | 2014 |
| Multimorbidity rehabilitation in chronic disease: general rehabilitation compared to usual care                                                                                                                                   | Cardiovascular Disease | Rehabilitation | 16  |  | Not Available                    | Australia | Randomized, Parallel Assignment | Research Institute | 2014 |
| Prescribing the maximum tolerated dose of walking for people with severe knee osteoarthritis: A Phase II, Randomised Controlled Trial                                                                                             | Arthritis              | Rehabilitation | 46  |  | Race and Ethnicity Not Collected | Australia | Randomized, Parallel Assignment | University         | 2014 |
| TriPoD: Trial for the Prevention of Depression in final year secondary school students                                                                                                                                            | Mental Illness         | Behavioral     | 540 |  | Race and Ethnicity Not Collected | Australia | Randomized                      | NHMRC              | 2014 |
| A Study of ARC-AAT in Healthy Volunteer Subjects and Patients With Alpha-1 Antitrypsin Deficiency (AATD)                                                                                                                          | Respiratory Disease    | Drug           | 65  |  | Race and Ethnicity Not Collected | Australia | Randomized, Parallel Assignment | Industry           | 2015 |
| A Study to Compare Insulin Intensification of Biphasic Insulin Aspart 30 and Insulin Analogues (Insulin Glargine and Insulin Aspart) in Insulin na <sup>-</sup> ve Type 2 Diabetic Patients                                       | Diabetes               | Drug           | 335 |  | Race and Ethnicity Not Collected | Australia | Randomized, Parallel Assignment | Industry           | 2015 |
| An evaluation of the efficacy of curcumin and saffron for the treatment of depression                                                                                                                                             | Mental Illness         | Other          | 160 |  | Race and Ethnicity Not Collected | Australia | Randomized, Parallel Assignment | Industry           | 2015 |
| Canakinumab Add-on Treatment in Schizophrenia (CATS)                                                                                                                                                                              | Mental Illness         | Drug           | 29  |  | Race and Ethnicity Not Collected | Australia | Randomized, Parallel Assignment | University         | 2015 |
| Efficacy of Dexamethasone in reducing pain, nausea and vomiting, improve mobilisation and reduce hospital stay in hip and knee arthroplasty: a double blind controlled trial                                                      | Arthritis              | Drug           | 142 |  | Race and Ethnicity Not Collected | Australia | Randomized, Parallel Assignment | Research Institute | 2015 |
| Low Energy Therapy to Convert Ventricular Tachycardias                                                                                                                                                                            | Cardiovascular Disease | Device         | 9   |  | Race and Ethnicity Not Collected | Australia | Single Group Assignment         | Industry           | 2015 |
| The effectiveness of kinesiology taping for shoulder on pain and motor control in patients after stroke                                                                                                                           | Cardiovascular Disease | Other          | 10  |  | Not Available                    | Australia | Randomized, Parallel Assignment | Individual         | 2015 |

|                                                                                                                                                                                                                                                                       |                        |                    |      |   |                                  |           |                                  |                    |      |
|-----------------------------------------------------------------------------------------------------------------------------------------------------------------------------------------------------------------------------------------------------------------------|------------------------|--------------------|------|---|----------------------------------|-----------|----------------------------------|--------------------|------|
| The Health Anxiety Program: a pilot trial of an online program for people who worry excessively about their health                                                                                                                                                    | Mental Illness         | Behavioral         | 16   |   | Race and Ethnicity Not Collected | Australia | Single Group Assignment          | Industry           | 2015 |
| The Resilience at Work (RAW) Mindfulness Program: The development and evaluation of an online mindfulness based training program aimed at enhancing psychological resilience and wellbeing among Emergency Workers                                                    | Mental Illness         | Behavioral         | 143  |   | Race and Ethnicity Not Collected | Australia | Randomized, Parallel Assignment  | Research Institute | 2015 |
| An evaluation of user acceptance and performance of a mobile real-time continuous glucose monitoring system.                                                                                                                                                          | Diabetes               | Device             | 10   |   | Not Available                    | Australia | Randomized, Crossover Assignment | Hospital           | 2016 |
| Consumer Choice of Pre-Packaged Foods that Vary by Nutrition Information and Price                                                                                                                                                                                    | Diabetes               | Behavioral         | 2067 |   | Race and Ethnicity Not Collected | Australia | Randomized, Crossover Assignment | University         | 2016 |
| Efficacy and safety of a single injection of Articul One in comparison with Synvisc-One Registered Trademark or placebo for the treatment of symptomatic primary knee osteoarthritis.                                                                                 | Arthritis              | Drug               | 30   |   | Not Available                    | Australia | Randomized, Parallel Assignment  | Industry           | 2016 |
| Fish Oil Cell Uptake Study of Inflammation – a trial of fish oil supplementation in healthy volunteers                                                                                                                                                                | Cardiovascular Disease | Dietary Supplement | 40   |   | Not Available                    | Australia | Randomized, Parallel Assignment  | Individual         | 2016 |
| General Practice Optimising Structured Monitoring To Improve Clinical outcomes in Type 2 Diabetes: An individually randomised trial of the effect of retrospective continuous glucose monitoring (rCGM) for people with type 2 diabetes in general practice on HbA1c. | Diabetes               | Device             | 299  |   | Not Available                    | Australia | Randomized, Parallel Assignment  | NHMRC              | 2016 |
| The effectiveness of a stretching intervention in lowering plantar pressures related to reduced ankle range of motion in people with diabetes.                                                                                                                        | Diabetes               | Behavioral         | 68   |   | Not Available                    | Australia | Randomized, Parallel Assignment  | University         | 2016 |
| The Evaluation of Individualized Telehealth Intensive Coaching to promote healthy Eating and lifestyle in Chronic Kidney Disease                                                                                                                                      | Kidney Disease         | Behavioral         | 82   | 1 | Indigenous                       | Australia | Randomized, Parallel Assignment  | Research Institute | 2016 |
| The MIRROR2 pilot study: prevention of Major depression among older people living in Regional and Remote Areas of Western Australia                                                                                                                                   | Mental Illness         | Behavioral         | 309  |   | Not Available                    | Australia | Randomized, Parallel Assignment  | University         | 2016 |
| What is the optimal dose of insulin for the protein content of a meal in individuals with type 1 diabetes mellitus using intensive insulin therapy                                                                                                                    | Diabetes               | Other              | 32   |   | Not Available                    | Australia | Randomized                       | Hospital           | 2016 |
| A 12 week pilot study targeted for adult consumers within a community mental health rehabilitation setting to implement a Personal Safety Tool for self-management and crisis management.                                                                             | Mental Illness         | Behavioral         | 7    |   | Not Available                    | Australia | Non-randomized                   | Industry           | 2017 |
| A phase 2b, randomised double blind placebo controlled multicentre study to evaluate the effects of pentosan polysulfate sodium on treating pain in subjects with osteoarthritis of the knee and subchondral bone marrow lesions                                      | Arthritis              | Drug               | 126  |   | Race and Ethnicity Not Collected | Australia | Randomized, Parallel Assignment  | Industry           | 2017 |
| Ambulatory oxygen in interstitial lung disease                                                                                                                                                                                                                        | Respiratory Disease    | Device             | 30   |   | Race and Ethnicity Not Collected | Australia | Randomized, Parallel Assignment  | Industry           | 2017 |

|                                                                                                                                                                                                                            |                        |                |     |   |                                  |           |                                     |                    |      |
|----------------------------------------------------------------------------------------------------------------------------------------------------------------------------------------------------------------------------|------------------------|----------------|-----|---|----------------------------------|-----------|-------------------------------------|--------------------|------|
| Embedding High Intensity Interval Training (HIIT) into the school day: The Burn 2 Learn pilot trial for senior school students                                                                                             | Diabetes               | Behavioral     | 68  | 0 |                                  | Australia | Randomized, Parallel Assignment     | NHMRC              | 2017 |
| Examining the Feasibility of an Online Cognitive Behaviour Therapy (CBT) - based self-management Program for Adults with Neurological Conditions.                                                                          | Mental Illness         | Behavioral     | 105 |   | Race and Ethnicity Not Collected | Australia | Single Group Assignment             | University         | 2017 |
| Goal oriented instructions increase the number of repetitions completed in stroke rehabilitation: A within-participant, repeated measures experimental study                                                               | Cardiovascular Disease | Rehabilitation | 24  |   | Race and Ethnicity Not Collected | Australia | Randomized, Parallel Assignment     | University         | 2017 |
| Nutritional supplements for prevention of type 2 diabetes - postprandial study                                                                                                                                             | Diabetes               | Behavioral     | 16  |   | Race and Ethnicity Not Collected | Australia | Randomized, Crossover Assignment    | University         | 2017 |
| Development and evaluation of a nursing risk assessment manual handling training program for moving patients with a stroke and other conditions affecting mobility: The Risk Assessment for Moving Patients (RAMP) program | Cardiovascular Disease | Behavioral     | 72  |   | Not Available                    | Australia | Single Group Assignment             | Industry           | 2018 |
| Efficacy of saffron as an adjunct treatment for unremitted depression in adults                                                                                                                                            | Mental Illness         | Other          | 160 |   | Race and Ethnicity Not Collected | Australia | Randomized, Parallel Assignment     | Industry           | 2018 |
| Beta Blockers and Angiotensin Receptor Blockers in Bicuspid Aortic Valve Disease Aortopathy (BAV Study)                                                                                                                    | Cardiovascular Disease | Drug           | 85  | 0 |                                  | Canada    | Randomized, Parallel Assignment     | Research Institute | 2011 |
| Bystander Fatigue and CPR Quality Using Continuous Compressions Versus 30:2 Compressions to Ventilation                                                                                                                    | Cardiovascular Disease | Procedure      | 63  |   | Race and Ethnicity Not Collected | Canada    | Randomized, Crossover Assignment    | Research Institute | 2011 |
| Comparison of the Bioavailability of Metformin Between Medium Dose Linagliptin/Metformin Tablets and Medium Dose Glucophage Tablet Given With Linagliptin Tablet                                                           | Diabetes               | Drug           | 58  |   | Race and Ethnicity Not Collected | Canada    | Randomized, Crossover Assignment    | Industry           | 2011 |
| Effect of Travoprost 0.004% on Retinal Oximetry in Primary Open Angle Glaucoma                                                                                                                                             | Hypertension           | Drug           | 16  |   | Race and Ethnicity Not Collected | Canada    | Non-randomized, Parallel Assignment | University         | 2012 |
| Improving Oral Care to Reduce Hospital-Acquired Pneumonia (HAP) in the Acute Neurologically Impaired Adult                                                                                                                 | Respiratory Disease    | Other          | 32  |   | Race and Ethnicity Not Collected | Canada    | Single Group Assignment             | Industry           | 2012 |
| 52 Week Trial of Liraglutide in Type 1 Diabetes                                                                                                                                                                            | Diabetes               | Drug           | 15  |   | Race and Ethnicity Not Collected | Canada    | Randomized, Parallel Assignment     | University         | 2013 |
| The Family Cognitive Adaptation Training Manual: A Test of Effectiveness                                                                                                                                                   | Mental Illness         | Behavioral     | 40  | 0 |                                  | Canada    | Randomized, Parallel Assignment     | Industry           | 2013 |
| A Study of Single or Repeated Doses of Glucagon in Participants With Diabetes                                                                                                                                              | Diabetes               | Drug           | 32  | 0 |                                  | Canada    | Randomized, Crossover Assignment    | Industry           | 2015 |
| MONITOR-OA: Using Wearable Activity Trackers to Improve Physical Activity in Knee Osteoarthritis                                                                                                                           | Arthritis              | Behavioral     | 61  |   | Race and Ethnicity Not Collected | Canada    | Randomized, Crossover Assignment    | University         | 2015 |

|                                                                                                                                                                                                                                                |                        |            |      |     |                                                                             |          |                                  |                    |      |
|------------------------------------------------------------------------------------------------------------------------------------------------------------------------------------------------------------------------------------------------|------------------------|------------|------|-----|-----------------------------------------------------------------------------|----------|----------------------------------|--------------------|------|
| The INDORSE Study: Inhibition of Dipeptidyl Peptidase IV: Outcomes on Renal Sodium Excretion                                                                                                                                                   | Diabetes               | Other      | 32   |     | Race and Ethnicity Not Collected                                            | Canada   | Randomized, Parallel Assignment  | Hospital           | 2015 |
| Feasibility Study of DermGEN for Diabetic Foot Ulcer Treatment                                                                                                                                                                                 | Diabetes               | Biological | 11   |     | Race and Ethnicity Not Collected                                            | Canada   | Single Group Assignment          | CIHR               | 2016 |
| To Investigate the Efficacy of an Occluding Dentifrice in Dentinal Hypersensitivity (DH)                                                                                                                                                       | Dental Disease         | Other      | 192  | 0   |                                                                             | Canada   | Randomized, Parallel Assignment  | Industry           | 2016 |
| Utilizing Novel Dipole Density Capabilities to Objectively Visualize the Etiology of Rhythms in Atrial Fibrillation                                                                                                                            | Cardiovascular Disease | Device     | 129  | 0   |                                                                             | Canada   | Single Group Assignment          | Industry           | 2016 |
| Feasibility and Outcomes of a Digital Health Support for the Schizophrenia Spectrum                                                                                                                                                            | Mental Illness         | Device     | 38   | 0   |                                                                             | Canada   | Single Group Assignment          | Industry           | 2017 |
| A Study to Evaluate the Long-Term Safety of MEDI-545 in Adult Participants With Systemic Lupus Erythematosus or Myositis                                                                                                                       | Arthritis              | Drug       | 103  |     | Race and Ethnicity Not Collected                                            | Multiple | Single Group Assignment          | Industry           | 2010 |
| An Efficacy, Safety, and Tolerability Study of Canagliflozin in Patients With Type 2 Diabetes Mellitus Who Have Moderate Renal Impairment                                                                                                      | Diabetes               | Drug       | 272  |     | Race and Ethnicity Not Collected                                            | Multiple | Randomized, Parallel Assignment  | Research Institute | 2010 |
| An Open-Label, Multicenter, Rollover, Long-term Study of Aripiprazole Intramuscular Depot in Participants With Schizophrenia                                                                                                                   | Mental Illness         | Drug       | 709  | 2   | American Indian or Alaska Native, Native Hawaiian or Other Pacific Islander | Multiple | Single Group Assignment          | Industry           | 2010 |
| BI 10773 (Empagliflozin) Cardiovascular Outcome Event Trial in Type 2 Diabetes Mellitus Patients (EMPA-REG OUTCOME).                                                                                                                           | Diabetes               | Drug       | 7028 | 0   |                                                                             | Multiple | Randomized, Parallel Assignment  | Industry           | 2010 |
| CALIPSO: Calfactant for Acute Lung Injury in Pediatric Stem Cell Transplant and Oncology Patients                                                                                                                                              | Respiratory Disease    | Drug       | 43   | 1   | American Indian or Alaska Native                                            | Multiple | Randomized, Parallel Assignment  | University         | 2010 |
| Clinical Trials to Reduce the Risk of Antimicrobial Resistance                                                                                                                                                                                 | Respiratory Disease    | Drug       | 43   |     | Race and Ethnicity Not Collected                                            | Multiple | Randomized, Parallel Assignment  | University         | 2010 |
| Efficacy and Safety of 3 Doses of Tiotropium Compared to Placebo in Adolescents (12 to 17 Yrs) With Moderate Asthma                                                                                                                            | Respiratory Disease    | Drug       | 105  | 0   |                                                                             | Multiple | Randomized, Crossover Assignment | Industry           | 2010 |
| Evaluation of Cardiovascular Outcomes in Patients With Type 2 Diabetes After Acute Coronary Syndrome During Treatment With AVE0010 (Lixisenatide)                                                                                              | Diabetes               | Drug       | 6068 | 0   |                                                                             | Multiple | Randomized, Parallel Assignment  | Industry           | 2010 |
| Evaluation of the Pharmacodynamic Effect of the Combination of Sildenafil and Riociguat on Blood Pressure and Other Safety Parameters.                                                                                                         | Hypertension           | Drug       | 18   | 0   |                                                                             | Multiple | Randomized, Parallel Assignment  | Industry           | 2010 |
| Evaluation of Tiotropium 2.5 and 5 mcg Once Daily Delivered Via the Respimat® Inhaler Compared to Placebo and Salmeterol HydroFluoroAlkane (HFA) Metered Dose Inhaler (MDI) (50 mcg Twice Daily) in Patient With Moderate Persistent Asthma II | Respiratory Disease    | Drug       | 1032 | 118 | American Indian or Alaska Native                                            | Multiple | Randomized, Parallel Assignment  | Industry           | 2010 |



|                                                                                                                                                                                   |                        |                    |      |   |                                           |          |                                  |                    |      |
|-----------------------------------------------------------------------------------------------------------------------------------------------------------------------------------|------------------------|--------------------|------|---|-------------------------------------------|----------|----------------------------------|--------------------|------|
| FAME II - Fractional Flow Reserve (FFR) Guided Percutaneous Coronary Intervention (PCI) Plus Optimal Medical Treatment (OMT) Verses OMT                                           | Cardiovascular Disease | Other              | 1170 |   | Race and Ethnicity Not Collected          | Multiple | Randomized, Parallel Assignment  | Industry           | 2010 |
| Impact of Dietary Intervention on Weight Change in Subjects With Type 2 Diabetes                                                                                                  | Diabetes               | Dietary Supplement | 611  | 3 | Native Hawaiian or Other Pacific Islander | Multiple | Randomized, Parallel Assignment  | Industry           | 2010 |
| Kidney Damage in Patients With Moderate Fall in eGFR                                                                                                                              | Cardiovascular Disease | Drug               | 57   |   | Race and Ethnicity Not Collected          | Multiple | Randomized, Parallel Assignment  | Industry           | 2010 |
| Phase II Study of Afinitor vs. Sutent in Patients With Metastatic Non-Clear Cell Renal Cell Carcinoma                                                                             | Kidney Disease         | Drug               | 131  | 0 |                                           | Multiple | Randomized, Parallel Assignment  | University         | 2010 |
| Safety and Efficacy of AIN457 in Patients With Quiescent Non-infectious Uveitis                                                                                                   | Arthritis              | Drug               | 125  |   | Race and Ethnicity Not Collected          | Multiple | Randomized, Parallel Assignment  | Industry           | 2010 |
| Study Comparing Synthetic Vascular Grafts in Patients With Peripheral Artery Disease (PAD) Who Require Artery Bypass.                                                             | Cardiovascular Disease | Device             | 207  | 0 |                                           | Multiple | Randomized, Parallel Assignment  | Industry           | 2010 |
| The CANTATA-MP Trial (CANagliflozin Treatment and Trial Analysis - Metformin and Pioglitazone)                                                                                    | Diabetes               | Drug               | 344  |   | Race and Ethnicity Not Collected          | Multiple | Randomized, Parallel Assignment  | Research Institute | 2010 |
| An Exercise Endurance Study to Evaluate the Effects of Treatment of Chronic Obstructive Pulmonary Disease (COPD) Patients With a Dual Bronchodilator: GSK573719/GW642444. Study A | Respiratory Disease    | Drug               | 307  | 1 | American Indian or Alaska Native          | Multiple | Randomized, Crossover Assignment | Industry           | 2011 |
| AugmentÂ® Injectable Bone Graft Compared to Autologous Bone Graft as a Bone Regeneration Device in Hindfoot Fusions                                                               | Arthritis              | Device             | 299  |   | Race and Ethnicity Not Collected          | Multiple | Randomized, Parallel Assignment  | Industry           | 2011 |
| Aztreonam Lysine for Pseudomonas Infection Eradication Study                                                                                                                      | Respiratory Disease    | Drug               | 105  | 0 |                                           | Multiple | Single Group Assignment          | Industry           | 2011 |
| Clinical Trial Evaluating TechnosphereÂ® Insulin Versus Insulin Aspart in Subjects With Type 1 Diabetes Mellitus Over a 24-week Treatment Period                                  | Diabetes               | Drug               | 518  | 1 | Native Hawaiian or Other Pacific Islander | Multiple | Randomized, Parallel Assignment  | Industry           | 2011 |
| Continuous Soluble Ferric Pyrophosphate (SFP) Iron Delivery Via Dialysate in Hemodialysis Patients                                                                                | Kidney Disease         | Drug               | 108  | 0 |                                           | Multiple | Randomized, Parallel Assignment  | Industry           | 2011 |
| DysportÂ® Adult Upper Limb Spasticity Extension Study                                                                                                                             | Cardiovascular Disease | Biological         | 258  | 0 |                                           | Multiple | Single Group Assignment          | Industry           | 2011 |
| Effect of Liraglutide on Body Weight in Overweight or Obese Subjects With Type 2 Diabetes: SCALEâ„¢ - Diabetes                                                                    | Diabetes               | Drug               | 846  | 4 | American Indian or Alaska Native          | Multiple | Randomized, Parallel Assignment  | Industry           | 2011 |
| Effects of Two Dosing Regimens of Bosentan in Children With Pulmonary Arterial Hypertension                                                                                       | Respiratory Disease    | Drug               | 64   |   | Race and Ethnicity Not Collected          | Multiple | Randomized, Parallel Assignment  | Industry           | 2011 |
| Efficacy at 24 Weeks and Long Term Safety, Tolerability and Efficacy up to 2 Years of Secukinumab (AIN457) in Patients With Active Psoriatic Arthritis (PsA)                      | Arthritis              | Drug               | 606  |   | Race and Ethnicity Not Collected          | Multiple | Randomized, Parallel Assignment  | Industry           | 2011 |

|                                                                                                                                                                                                                                                                                                        |                     |      |      |   |                                                                             |          |                                 |            |      |
|--------------------------------------------------------------------------------------------------------------------------------------------------------------------------------------------------------------------------------------------------------------------------------------------------------|---------------------|------|------|---|-----------------------------------------------------------------------------|----------|---------------------------------|------------|------|
| Epoprostenol for Injection (EPI/ACT-385781A) - Pulmonary Arterial Hypertension                                                                                                                                                                                                                         | Respiratory Disease | Drug | 42   | 0 |                                                                             | Multiple | Single Group Assignment         | Industry   | 2011 |
| MEembranous Nephropathy Trial Of Rituximab                                                                                                                                                                                                                                                             | Kidney Disease      | Drug | 130  | 0 |                                                                             | Multiple | Single Group Assignment         | University | 2011 |
| Open Label Extension Study of Epratuzumab in Subjects With Systemic Lupus Erythematosus                                                                                                                                                                                                                | Arthritis           | Drug | 1250 |   | Race and Ethnicity Not Collected                                            | Multiple | Randomized, Parallel Assignment | Industry   | 2011 |
| PEARL Schizophrenia Maintenance                                                                                                                                                                                                                                                                        | Mental Illness      | Drug | 676  | 4 | American Indian or Alaska Native, Native Hawaiian or Pacific Islander       | Multiple | Randomized, Parallel Assignment | Industry   | 2011 |
| Phase I Biomarker Study (BMS-936558)                                                                                                                                                                                                                                                                   | Kidney Disease      | Drug | 119  | 0 |                                                                             | Multiple | Randomized, Parallel Assignment | Industry   | 2011 |
| Roflumilast in Chronic Obstructive Pulmonary Disease (COPD) Patients Treated With Fixed Combinations of Long-acting $\beta_2$ -agonists (LABA) and Inhaled Glucocorticosteroid (ICS)                                                                                                                   | Respiratory Disease | Drug | 1945 | 0 |                                                                             | Multiple | Randomized, Parallel Assignment | Industry   | 2011 |
| Safety & Efficacy of BCT197 in Patients Undergoing Cardiac Surgery                                                                                                                                                                                                                                     | Kidney Disease      | Drug | 91   | 0 |                                                                             | Multiple | Randomized, Parallel Assignment | Industry   | 2011 |
| Safety and Efficacy of Levomilnacipran ER (Levomilnacipran SR) in Major Depressive Disorder                                                                                                                                                                                                            | Mental Illness      | Drug | 568  | 4 | American Indian or Alaska Native, Native Hawaiian or Other Pacific Islander | Multiple | Randomized, Parallel Assignment | Industry   | 2011 |
| Safety, Tolerability, and Efficacy of Cariprazine in Participants With Bipolar Depression                                                                                                                                                                                                              | Mental Illness      | Drug | 584  | 7 | American Indian or Alaska Native                                            | Multiple | Randomized, Parallel Assignment | Industry   | 2011 |
| Study Of A Controlled Release Formulation Of Pregabalin In Fibromyalgia Patients                                                                                                                                                                                                                       | Arthritis           | Drug | 441  | 0 |                                                                             | Multiple | Randomized, Parallel Assignment | Industry   | 2011 |
| Study to Evaluate the 24-Hour Pulmonary Function Profile of Fluticasone Furoate (FF) /GW642444 (Vilanterol) (VI) Inhalation Powder 100/25mcg Once Daily Compared With Fluticasone Propionate/Salmeterol Inhalation Powder 250/50mcg Twice Daily in Subjects With Chronic Obstructive Pulmonary Disease | Respiratory Disease | Drug | 519  | 1 | American Indian or Alaska Native                                            | Multiple | Randomized, Parallel Assignment | Industry   | 2011 |
| Study to Evaluate the Efficacy and Safety of the Combination of Valtorna and Amlodipine or Valtorna and Chlorthalidone Versus Valtorna Alone in Patients With Stage 2 Hypertension and Diabetes                                                                                                        | Diabetes            | Drug | 975  |   | Race and Ethnicity Not Collected                                            | Multiple | Randomized, Parallel Assignment | Industry   | 2011 |

|                                                                                                                                                                                                                                                                                 |                        |            |     |   |                                           |          |                                     |          |      |
|---------------------------------------------------------------------------------------------------------------------------------------------------------------------------------------------------------------------------------------------------------------------------------|------------------------|------------|-----|---|-------------------------------------------|----------|-------------------------------------|----------|------|
| Study to Evaluate the Efficacy, Safety, Tolerability, and Pharmacokinetics of Saxagliptin as Monotherapy in Pediatric Patients With Type 2 Diabetes                                                                                                                             | Diabetes               | Drug       | 26  |   | Race and Ethnicity Not Collected          | Multiple | Randomized, Parallel Assignment     | Industry | 2011 |
| A Trial of ASP7487 (OSI-906) in Combination With Bortezomib for the Treatment of Relapsed Multiple Myeloma                                                                                                                                                                      | Cardiovascular Disease | Drug       | 19  | 0 |                                           | Multiple | Single Group Assignment             | Hospital | 2012 |
| BIIB023 Proof-of-Concept Study in Participants With Lupus Nephritis                                                                                                                                                                                                             | Arthritis              | Biological | 276 |   | Race and Ethnicity Not Collected          | Multiple | Randomized, Parallel Assignment     | Industry | 2012 |
| Daily Use of Lipikar Balm AP From Birth in Infants at High Risk of Developing Atopic Dermatitis                                                                                                                                                                                 | Respiratory Disease    | Drug       | 2   |   | Race and Ethnicity Not Collected          | Multiple | Randomized, Parallel Assignment     | Industry | 2012 |
| Effects of Ventavis in Patients With Pulmonary Hypertension (PH) Secondary to Chronic Obstructive Pulmonary Disease (COPD)                                                                                                                                                      | Respiratory Disease    | Drug       | 2   |   | Race and Ethnicity Not Collected          | Multiple | Randomized, Parallel Assignment     | Industry | 2012 |
| Efficacy and Safety of QMF149 vs. Salmeterol Xinafoate/Fluticasone Propionate in Patients With Chronic Obstructive Pulmonary Disease (COPD)                                                                                                                                     | Respiratory Disease    | Drug       | 629 | 0 |                                           | Multiple | Randomized, Parallel Assignment     | Industry | 2012 |
| Efficacy, Safety and Tolerability of Two Fixed Dose Combinations of Aclidinium Bromide/Formoterol Fumarate, Aclidinium Bromide, Formoterol Fumarate and Placebo for 28-Weeks Treatment in Patients With Moderate to Severe, Stable Chronic Obstructive Pulmonary Disease (COPD) | Respiratory Disease    | Drug       | 921 | 0 |                                           | Multiple | Randomized, Parallel Assignment     | Industry | 2012 |
| Evaluation of Safety and Efficacy, Including Pharmacokinetics, of NNC 0129-0000-1003 When Administered for Treatment and Prophylaxis of Bleeding in Subjects With Haemophilia A                                                                                                 | Cardiovascular Disease | Drug       | 186 | 0 |                                           | Multiple | Non-randomized, Parallel Assignment | Industry | 2012 |
| Heart And Lung Failure - Pediatric Insulin Titration Trial                                                                                                                                                                                                                      | Cardiovascular Disease | Drug       | 713 | 0 |                                           | Multiple | Randomized, Parallel Assignment     | NIH      | 2012 |
| Phase 3b Safety and Efficacy Study of Apremilast to Treat Moderate to Severe Plaque-plaque Psoriasis                                                                                                                                                                            | Arthritis              | Drug       | 250 | 0 |                                           | Multiple | Randomized, Parallel Assignment     | Industry | 2012 |
| Phase III Clinical Worsening Study of UT-15C in Subjects With PAH Receiving Background Oral Monotherapy                                                                                                                                                                         | Respiratory Disease    | Drug       | 690 | 0 |                                           | Multiple | Randomized, Parallel Assignment     | Industry | 2012 |
| Safety, Efficacy and Pharmacokinetics of NNC-0156-0000-0009 in Previously Treated Children With Haemophilia B.                                                                                                                                                                  | Cardiovascular Disease | Drug       | 25  | 0 |                                           | Multiple | Single Group Assignment             | Industry | 2012 |
| Study of Ivacaftor in Subjects With Cystic Fibrosis (CF) Who Have the R117H-CF Transmembrane Conductance Regulator (CFTR) Mutation (KONDUCT)                                                                                                                                    | Respiratory Disease    | Drug       | 69  |   | Race and Ethnicity Not Collected          | Multiple | Randomized, Parallel Assignment     | Industry | 2012 |
| Study of LY2886721 in Mild Cognitive Impairment Due to Alzheimer's Disease or Mild Alzheimer's Disease                                                                                                                                                                          | Mental Illness         | Drug       | 70  | 0 |                                           | Multiple | Randomized, Parallel Assignment     | Industry | 2012 |
| Study of Pomalidomide (CC-4047) to Evaluate Safety, Tolerability, Pharmacokinetics, Pharmacodynamics and Effectiveness for Patients With Systemic Sclerosis With Interstitial Lung Disease                                                                                      | Arthritis              | Drug       | 23  | 1 | Native Hawaiian or Other Pacific Islander | Multiple | Randomized, Parallel Assignment     | Industry | 2012 |

|                                                                                                                                                                    |                        |        |       |     |                                                                             |          |                                 |          |      |
|--------------------------------------------------------------------------------------------------------------------------------------------------------------------|------------------------|--------|-------|-----|-----------------------------------------------------------------------------|----------|---------------------------------|----------|------|
| Study of the Effect of Fostamatinib Twice Daily on Blood Pressure in Patients With Rheumatoid Arthritis                                                            | Arthritis              | Drug   | 266   | 0   |                                                                             | Multiple | Randomized, Parallel Assignment | Industry | 2012 |
| Treatment of Resistant Hypertension Using a Radiofrequency Percutaneous Transluminal Angioplasty Catheter                                                          | Hypertension           | Device | 146   | 0   |                                                                             | Multiple | Single Group Assignment         | Industry | 2012 |
| An Evaluation of Sarilumab Plus Methotrexate Compared to Etanercept Plus Methotrexate in RA Patients Not Responding to Adalimumab Plus Methotrexate                | Arthritis              | Drug   | 776   |     | Race and Ethnicity Not Collected                                            | Multiple | Randomized, Parallel Assignment | Industry | 2013 |
| Blinded Safety & Efficacy Placebo Controlled Study of Icatibant for Angiotensin Converting Enzyme Inhibitor Induced Angioedema                                     | Cardiovascular Disease | Drug   | 121   | 0   |                                                                             | Multiple | Randomized, Parallel Assignment | Industry | 2013 |
| Clinical Study to Assess the Long-term Safety, Tolerability, and Efficacy of Macitentan in Subjects With Eisenmenger Syndrome                                      | Hypertension           | Drug   | 217   | 0   |                                                                             | Multiple | Single Group Assignment         | Industry | 2013 |
| Clinical Study to Evaluate the Effects of Macitentan on Exercise Capacity in Subjects With Eisenmenger Syndrome                                                    | Hypertension           | Drug   | 226   | 0   |                                                                             | Multiple | Randomized, Parallel Assignment | Industry | 2013 |
| Comparison of Fasiglifam (TAK-875) With Sitagliptin When Used in Combination With Metformin in Patients With Type 2 Diabetes                                       | Diabetes               | Drug   | 96    | 1   | Native Hawaiian or Other Pacific Islander                                   | Multiple | Randomized, Parallel Assignment | Industry | 2013 |
| Efficacy, Safety and Pharmacokinetics Study of Antroquinonol to Treat NSCLC                                                                                        | Respiratory Disease    | Drug   | 31    | 0   |                                                                             | Multiple | Single Group Assignment         | Industry | 2013 |
| Evaluate the Effect of Aclidinium Bromide on Long-term Cardiovascular Safety and Exacerbations in Moderate to Very Severe COPD Patients.                           | Respiratory Disease    | Drug   | 3635  | 12  | American Indian or Alaska Native, Native Hawaiian or Other Pacific Islander | Multiple | Randomized, Parallel Assignment | Industry | 2013 |
| Gadobutrol / Gadavist-enhanced Cardiac Magnetic Resonance Imaging (CMRI) to Detect Coronary Artery Disease (CAD)                                                   | Cardiovascular Disease | Drug   | 426   | 0   |                                                                             | Multiple | Single Group Assignment         | Industry | 2013 |
| Multicenter Trial to Evaluate the Effect of Dapagliflozin on the Incidence of Cardiovascular Events                                                                | Diabetes               | Drug   | 17190 | 126 | American Indian or Alaska Native, Native Hawaiian or Other Pacific Islander | Multiple | Randomized, Parallel Assignment | Industry | 2013 |
| nMARQâ„ Pulmonary Vein Isolation System for the Treatment of Paroxysmal Atrial Fibrillation                                                                       | Cardiovascular Disease | Device | 481   | 3   | American Indian or Alaska Native                                            | Multiple | Randomized, Parallel Assignment | Industry | 2013 |
| Open Label, Phase II Study to Evaluate Efficacy and Safety of Oral Nilotinib in Philadelphia Positive (Ph+) Chronic Myelogenous Leukemia (CML) Pediatric Patients. | Cardiovascular Disease | Drug   | 59    | 1   | Native Americans                                                            | Multiple | Single Group Assignment         | Industry | 2013 |

|                                                                                                                                                                                   |                        |            |       |   |                                                                             |          |                                 |          |      |
|-----------------------------------------------------------------------------------------------------------------------------------------------------------------------------------|------------------------|------------|-------|---|-----------------------------------------------------------------------------|----------|---------------------------------|----------|------|
| Pediatric Schizophrenia Efficacy and Safety Study                                                                                                                                 | Mental Illness         | Drug       | 327   | 0 |                                                                             | Multiple | Randomized, Parallel Assignment | Industry | 2013 |
| Rivaroxaban for the Prevention of Major Cardiovascular Events in Coronary or Peripheral Artery Disease                                                                            | Cardiovascular Disease | Drug       | 27395 | 0 |                                                                             | Multiple | Randomized, Parallel Assignment | Industry | 2013 |
| Safety and Immunogenicity of Two Doses of H5N1 Influenza Vaccine in Healthy Adults                                                                                                | Respiratory Disease    | Biological | 979   | 4 | American Indian or Alaska Native, Native Hawaiian or Other Pacific Islander | Multiple | Randomized, Parallel Assignment | Industry | 2013 |
| Stenting of the Superficial Femoral and/or Proximal Popliteal Artery Project                                                                                                      | Cardiovascular Disease | Device     | 57    | 0 |                                                                             | Multiple | Single Group Assignment         | Industry | 2013 |
| The Evaluation of Bococizumab (PF-04950615; RN316) in Reducing the Occurrence of Major Cardiovascular Events in High Risk Subjects                                                | Cardiovascular Disease | Drug       | 10564 | 0 |                                                                             | Multiple | Randomized, Parallel Assignment | Industry | 2013 |
| Acetylsalicylic Acid Compared to Placebo in Treating High-Risk Patients With Subsolid Lung Nodules                                                                                | Respiratory Disease    | Drug       | 109   | 0 |                                                                             | Multiple | Randomized, Parallel Assignment | NIH      | 2014 |
| An Efficacy And Safety Study Evaluating Tofacitinib With And Without Methotrexate Compared To Adalimumab With Methotrexate                                                        | Arthritis              | Drug       | 1152  |   | Race and Ethnicity Not Collected                                            | Multiple | Randomized, Parallel Assignment | Industry | 2014 |
| Clinical Mismatch in the Triage of Wake Up and Late Presenting Strokes Undergoing Neurointervention With Trevo                                                                    | Cardiovascular Disease | Device     | 206   | 1 | Native Hawaiian or other Pacific Islander                                   | Multiple | Randomized, Parallel Assignment | Industry | 2014 |
| Comparison of CHS-0214 to Enbrel (Etanercept) in Patients With Rheumatoid Arthritis (RA)                                                                                          | Arthritis              | Drug       | 647   | 0 |                                                                             | Multiple | Randomized, Parallel Assignment | Industry | 2014 |
| Double-Blind, Multiple Ascending Dose Study to Assess Safety, Tolerability and Pharmacokinetics of DX-2930 in Hereditary Angioedema (HAE) Subjects                                | Cardiovascular Disease | Drug       | 38    | 0 |                                                                             | Multiple | Randomized, Parallel Assignment | Industry | 2014 |
| Effect of Eleclazine on Shortening of the QT Interval, Safety, and Tolerability in Adults With Long QT Syndrome Type 3                                                            | Cardiovascular Disease | Drug       | 41    | 1 | American Indian or Alaska Native                                            | Multiple | Single Group Assignment         | Industry | 2014 |
| Efficacy and Safety of Insulin Glargine/ Lixisenatide Fixed Ratio Combination Compared to Insulin Glargine Alone and Lixisenatide Alone on Top of Metformin in Patients With T2DM | Diabetes               | Drug       | 1170  | 0 |                                                                             | Multiple | Randomized, Parallel Assignment | Industry | 2014 |
| Efficacy and Safety of Riociguat in Patients With Symptomatic Pulmonary Hypertension (PH) Associated With Idiopathic Interstitial Pneumonias (IIP)                                | Respiratory Disease    | Drug       | 147   |   | Race and Ethnicity Not Collected                                            | Multiple | Randomized, Parallel Assignment | Industry | 2014 |
| Efficacy and Safety of Semaglutide Once-weekly Versus Placebo as add-on to Basal Insulin Alone or Basal Insulin in Combination With Metformin in Subjects With Type 2 Diabetes    | Diabetes               | Drug       | 397   | 0 |                                                                             | Multiple | Randomized, Parallel Assignment | Industry | 2014 |

|                                                                                                                                                                                                                    |                        |            |      |   |                                                                             |          |                                  |          |      |
|--------------------------------------------------------------------------------------------------------------------------------------------------------------------------------------------------------------------|------------------------|------------|------|---|-----------------------------------------------------------------------------|----------|----------------------------------|----------|------|
| Efficacy and Safety of the Insulin Glargine/Lixisenatide Fixed Ratio Combination Versus Insulin Glargine in Patients With Type 2 Diabetes                                                                          | Diabetes               | Drug       | 736  | 0 |                                                                             | Multiple | Randomized, Parallel Assignment  | Industry | 2014 |
| Efficacy and Safety Study of Benralizumab to Reduce OCS Use in Patients With Uncontrolled Asthma on High Dose Inhaled Corticosteroid Plus LABA and Chronic OCS Therapy                                             | Respiratory Disease    | Biological | 220  |   | Race and Ethnicity Not Collected                                            | Multiple | Randomized, Parallel Assignment  | Industry | 2014 |
| Efficacy and Safety Study of Bimatoprost Sustained-Release (SR) in Participants With Open-angle Glaucoma or Ocular Hypertension                                                                                    | Hypertension           | Drug       | 594  | 0 |                                                                             | Multiple | Randomized, Parallel Assignment  | Industry | 2014 |
| EINSTEIN Junior: Oral Rivaroxaban in Children With Venous Thrombosis                                                                                                                                               | Cardiovascular Disease | Drug       | 500  | 0 |                                                                             | Multiple | Randomized, Parallel Assignment  | Industry | 2014 |
| Estradiol Vaginal Softgel Capsules in Treating Symptoms of Vulvar and Vaginal Atrophy in Postmenopausal Women                                                                                                      | Mental Illness         | Drug       | 764  | 0 |                                                                             | Multiple | Randomized, Parallel Assignment  | Industry | 2014 |
| Evaluate the Maintenance of Efficacy of SPD489 in Adults Aged 18-55 Years With Moderate to Severe Binge Eating Disorder                                                                                            | Mental Illness         | Drug       | 418  | 0 |                                                                             | Multiple | Randomized, Parallel Assignment  | Industry | 2014 |
| Evaluation of Umeclidinium Bromide in Combination With Fluticasone Furoate in COPD Subjects With an Asthmatic Component                                                                                            | Respiratory Disease    | Drug       | 338  | 0 |                                                                             | Multiple | Randomized, Parallel Assignment  | Industry | 2014 |
| Investigation of Safety, Tolerability, Pharmacokinetics, Pharmacodynamics, and Clinical Efficacy of Oral Danirixin in Symptomatic COPD Subjects With Mild to Moderate Airflow Limitation at Risk for Exacerbations | Respiratory Disease    | Drug       | 102  | 0 |                                                                             | Multiple | Single Group Assignment          | Industry | 2014 |
| Long Term Safety of Immediate-release Tolvaptan in Subjects With Autosomal Dominant Polycystic Kidney Disease                                                                                                      | Kidney Disease         | Drug       | 1803 | 6 | American Indian or Alaska Native, Native Hawaiian or Other Pacific Islander | Multiple | Single Group Assignment          | Industry | 2014 |
| Lung-MAP: Taselisib as Therapy in Treating Patients With Stage IV Squamous Cell Lung Cancer and Positive Biomarker Matches                                                                                         | Respiratory Disease    | Other      | 26   | 1 | American Indian or Alaska Native                                            | Multiple | Single Group Assignment          | NIH      | 2014 |
| Pharmacokinetic Single Dose Trial of Empagliflozin in Children and Adolescents With Type 2 Diabetes Mellitus                                                                                                       | Diabetes               | Drug       | 27   | 3 | American Indian or Alaska Native                                            | Multiple | Randomized, Parallel Assignment  | Industry | 2014 |
| Safety and Efficacy Study of Abraxane as Maintenance Treatment After Abraxane Plus Carboplatin in 1st Line Stage IIIB / IV Squamous Cell Non-small Cell Lung Cancer                                                | Respiratory Disease    | Drug       | 427  | 1 | American Indian or Alaska Native                                            | Multiple | Randomized, Crossover Assignment | Industry | 2014 |
| Safety of Dabigatran Etxilate in Blood Clot Prevention in Children                                                                                                                                                 | Cardiovascular Disease | Drug       | 214  | 0 |                                                                             | Multiple | Single Group Assignment          | Industry | 2014 |
| Safety, Pharmacokinetics and Preliminary Efficacy Study of CFZ533 in Patients With Primary Sjögren's Syndrome                                                                                                      | Arthritis              | Drug       | 69   | 0 |                                                                             | Multiple | Randomized, Parallel Assignment  | Industry | 2014 |

|                                                                                                                                                                                                                                            |                        |            |      |   |                                                                             |          |                                     |                    |      |
|--------------------------------------------------------------------------------------------------------------------------------------------------------------------------------------------------------------------------------------------|------------------------|------------|------|---|-----------------------------------------------------------------------------|----------|-------------------------------------|--------------------|------|
| Study of FX006 vs Normal Saline in Patients With Osteoarthritis of the Knee                                                                                                                                                                | Arthritis              | Drug       | 310  | 0 |                                                                             | Multiple | Randomized, Parallel Assignment     | Industry           | 2014 |
| Efficacy and Safety of Alirocumab Versus Placebo on Top of Maximally Tolerated Lipid Lowering Therapy in Patients With Hypercholesterolemia Who Have Type 1 or Type 2 Diabetes and Are Treated With Insulin (ODYSSEY DM - Insulin)         | Cardiovascular Disease | Drug       | 517  | 0 |                                                                             | Multiple | Randomized, Parallel Assignment     | Industry           | 2015 |
| ELUVIA <sup>®</sup> , <sup>®</sup> Drug-eluting Stent Versus Zilver <sup>®</sup> PTX <sup>®</sup> Stent                                                                                                                                    | Cardiovascular Disease | Device     | 524  | 5 | American Indian or Alaska Native, Native Hawaiian or Other Pacific Islander | Multiple | Randomized, Parallel Assignment     | Industry           | 2015 |
| Emdogain Minimally Invasive Surgical Technique                                                                                                                                                                                             | Dental Disease         | Procedure  | 51   | 0 |                                                                             | Multiple | Randomized, Parallel Assignment     | Research Institute | 2015 |
| Extension Study of Ataluren in Participants With Nonsense Mutation Cystic Fibrosis                                                                                                                                                         | Respiratory Disease    | Drug       | 246  | 0 |                                                                             | Multiple | Single Group Assignment             | Industry           | 2015 |
| Pharmacokinetics of Eleclazine in Adults With Normal and Impaired Hepatic Function                                                                                                                                                         | Cardiovascular Disease | Drug       | 49   | 0 |                                                                             | Multiple | Non-randomized, Parallel Assignment | Industry           | 2015 |
| Safety and Effectiveness of the Orsiro Sirolimus Eluting Coronary Stent System in Subjects With Coronary Artery Lesions                                                                                                                    | Cardiovascular Disease | Device     | 1334 | 3 | Native Hawaiian or other Pacific Islander                                   | Multiple | Randomized, Parallel Assignment     | Industry           | 2015 |
| Safety and Efficacy Study of Nab <sup>®</sup> -Paclitaxel With CC-486 or Nab <sup>®</sup> -Paclitaxel With Durvalumab, and Nab <sup>®</sup> -Paclitaxel Monotherapy as Second/Third-line Treatment for Advanced Non-small Cell Lung Cancer | Respiratory Disease    | Drug       | 240  | 0 |                                                                             | Multiple | Non-randomized, Parallel Assignment | Industry           | 2015 |
| Study Comparing Daratumumab, Lenalidomide, and Dexamethasone With Lenalidomide and Dexamethasone in Participants With Previously Untreated Multiple Myeloma                                                                                | Cardiovascular Disease | Drug       | 737  | 1 | Native Hawaiian or Other Pacific Islander                                   | Multiple | Randomized, Parallel Assignment     | Research Institute | 2015 |
| Study to Assess the Efficacy and Safety of PT003, PT005, and PT001 in Subjects With Moderate to Very Severe COPD                                                                                                                           | Respiratory Disease    | Drug       | 1756 | 1 | American Indian or Alaska Native                                            | Multiple | Randomized, Parallel Assignment     | Industry           | 2015 |
| Study to Evaluate Maintenance of Sustained Remission of axSpA With CZP Compared to Placebo                                                                                                                                                 | Arthritis              | Biological | 736  | 2 | American Indian or Alaska Native                                            | Multiple | Randomized, Parallel Assignment     | Industry           | 2015 |
| Tai Chi for stress and cardiovascular function                                                                                                                                                                                             | Cardiovascular Disease | Other      | 120  | 0 |                                                                             | Multiple | Randomized, Parallel Assignment     | University         | 2015 |
| A Study to Evaluate the Onset of Effect and Time Course of Change in Lung Function With Benralizumab in Severe, Uncontrolled Asthma Patients With Eosinophilic Inflammation                                                                | Respiratory Disease    | Drug       | 233  | 0 |                                                                             | Multiple | Randomized, Parallel Assignment     | Industry           | 2016 |

|                                                                                                                                                                                                                    |                        |            |      |    |                                                                             |          |                                       |          |      |
|--------------------------------------------------------------------------------------------------------------------------------------------------------------------------------------------------------------------|------------------------|------------|------|----|-----------------------------------------------------------------------------|----------|---------------------------------------|----------|------|
| An 8-Week Dose-Finding Study to Evaluate the Efficacy and Safety of Alirocumab in Children and Adolescents With Heterozygous Familial Hypercholesterolemia                                                         | Cardiovascular Disease | Drug       | 42   | 0  |                                                                             | Multiple | Non-randomized, Sequential Assignment | Industry | 2016 |
| Effect of Lu AF35700 in Patients With Treatment-resistant Schizophrenia                                                                                                                                            | Mental Illness         | Drug       | 1098 | 4  | American Indian or Alaska Native, Native Hawaiian or Other Pacific Islander | Multiple | Randomized, Parallel Assignment       | Industry | 2016 |
| Efficacy and Safety of Faster-acting Insulin Aspart Compared to NovoRapid® Both in Combination With Insulin Degludec in Adults With Type 1 Diabetes                                                                | Diabetes               | Drug       | 1108 | 2  | American Indian or Alaska Native                                            | Multiple | Randomized, Parallel Assignment       | Industry | 2016 |
| Efficacy and Safety of Gemcabene in Patients With Homozygous Familial Hypercholesterolemia on Stable, Lipid-Lowering Therapy (COBALT-1)                                                                            | Cardiovascular Disease | Drug       | 8    | 0  |                                                                             | Multiple | Single Group Assignment               | Industry | 2016 |
| Evaluation of Evolocumab (AMG 145) Efficacy in Diabetic Adults With Hypercholesterolemia/Mixed Dyslipidemia                                                                                                        | Diabetes               | Biological | 424  | 17 | American Indian or Alaska Native, Native Hawaiian or Other Pacific Islander | Multiple | Randomized, Parallel Assignment       | Industry | 2016 |
| Evaluation of Immunogenicity and Safety of a Booster Dose of Infanrix Hexa <sub>2,3</sub> in Healthy Infants Born to Mothers Vaccinated With Boostrix <sub>2,3</sub> During Pregnancy or Immediately Post-delivery | Respiratory Disease    | Biological | 551  | 0  |                                                                             | Multiple | Non-randomized, Parallel Assignment   | Industry | 2016 |
| Evaluation of Long-Term Safety and Tolerability of ETC-1002 in High-Risk Patients With Hyperlipidemia and High CV Risk (CLEAR Harmony)                                                                             | Cardiovascular Disease | Drug       | 2230 | 5  | American Indian or Alaska Native, Native Hawaiian or Other Pacific Islander | Multiple | Randomized, Parallel Assignment       | Industry | 2016 |
| Long-term Safety and Efficacy Study of DX-2930 (SHP643) to Prevent Acute Angioedema Attacks in Patients With Type I and Type II HAE                                                                                | Cardiovascular Disease | Drug       | 212  | 0  |                                                                             | Multiple | Single Group Assignment               | Industry | 2016 |
| Mechanistic Study of GSK3196165 Plus Methotrexate (MTX) in Subjects With Active Rheumatoid Arthritis                                                                                                               | Arthritis              | Drug       | 39   | 0  |                                                                             | Multiple | Randomized, Parallel Assignment       | Industry | 2016 |
| Safety and Efficacy Study of a Protease Activated Receptor-4 Antagonist Being Tested to Reduce the Chances of Having Additional Strokes or "Mini Strokes"                                                          | Cardiovascular Disease | Drug       | 15   | 0  |                                                                             | Multiple | Randomized, Parallel Assignment       | Industry | 2016 |
| Safety and Efficacy Study of GDC-0853 Compared With Placebo and Adalimumab in Participants With Rheumatoid Arthritis (RA)                                                                                          | Arthritis              | Drug       | 578  | 51 | American Indian or Alaska Native                                            | Multiple | Randomized, Parallel Assignment       | Industry | 2016 |



|                                                                                                                                                                                                                                                                       |                        |            |      |    |                                           |             |                                  |                    |      |
|-----------------------------------------------------------------------------------------------------------------------------------------------------------------------------------------------------------------------------------------------------------------------|------------------------|------------|------|----|-------------------------------------------|-------------|----------------------------------|--------------------|------|
| Research Study Comparing a New Medicine "Fast-acting Insulin Aspart" to Another Already Available Medicine "NovoRapid"/"NovoLog" in People With Type 2 Diabetes                                                                                                       | Diabetes               | Drug       | 1264 | 7  | Native Hawaiian or Other Pacific Islander | Multiple    | Randomized, Parallel Assignment  | Industry           | 2017 |
| Safety and Efficacy of G-Pen Compared to Lilly Glucagon for Hypoglycemia Rescue in Adult Type 1 Diabetics                                                                                                                                                             | Diabetes               | Drug       | 80   | 0  |                                           | Multiple    | Randomized, Crossover Assignment | Industry           | 2017 |
| Safety, Pharmacokinetics and Efficacy Study of QCC374 in PAH Patients                                                                                                                                                                                                 | Respiratory Disease    | Drug       | 8    | 0  |                                           | Multiple    | Randomized, Parallel Assignment  | Industry           | 2017 |
| Study of LLG783 in Patients With Peripheral Artery Disease (PAD) and Intermittent Claudication                                                                                                                                                                        | Cardiovascular Disease | Drug       | 46   | 0  |                                           | Multiple    | Randomized, Parallel Assignment  | Industry           | 2017 |
| G-Pen Compared to Glucagen Hypokit for Severe Hypoglycemia Rescue in Adults With Type 1 Diabetes                                                                                                                                                                      | Diabetes               | Drug       | 132  | 1  | Native Hawaiian or Other Pacific Islander | Multiple    | Randomized, Crossover Assignment | Industry           | 2018 |
| Safety and Efficacy of EMA401 in Patients With Painful Diabetic Neuropathy (PDN)                                                                                                                                                                                      | Diabetes               | Drug       | 142  | 0  |                                           | Multiple    | Randomized, Parallel Assignment  | Industry           | 2018 |
| A randomized controlled trial to study the effect of a dietary supplement - a novel marine extract (BioLex (Registered Trademark)) - for the treatment of osteoarthritis.                                                                                             | Arthritis              | Other      | 80   | 5  | Maori and Pacific peoples                 | New Zealand | Randomized, Parallel Assignment  | Industry           | 2011 |
| Can the companion robot Paro improve quality of life in a residential care facility: A randomised controlled trial                                                                                                                                                    | Mental Illness         | Device     | 40   |    | Race and Ethnicity Not Collected          | New Zealand | Randomized, Parallel Assignment  | University         | 2012 |
| Bronchiolitis / Paracetamol in infancy: a feasibility study                                                                                                                                                                                                           | Respiratory Disease    | Other      | 40   | 40 | Maori and Pacific                         | New Zealand | Randomized, Parallel Assignment  | HRC                | 2013 |
| Comparative assessment of the absorption of a generic formulation of desvenlafaxine extended release tablet against the innovator desvenlafaxine extended release tablet conducted under fasting conditions and at steady state in healthy male and female volunteers | Mental Illness         | Drug       | 26   |    | Not Available                             | New Zealand | Randomized, Crossover Assignment | Industry           | 2013 |
| The BROAD study. A trial using the whole-foods, plant-based diet in a community programme for people with obesity, or overweight with ischaemic heart disease or diabetes                                                                                             | Cardiovascular Disease | Behavioral | 65   | 8  | Maori                                     | New Zealand | Randomized, Parallel Assignment  | Industry           | 2014 |
| Comparative assessment of the absorption of a generic formulation of metformin XR tablet against the innovator metformin SR prolonged release tablet conducted under fed conditions in healthy male and female volunteers                                             | Diabetes               | Drug       | 24   |    | Not Available                             | New Zealand | Randomized                       | Industry           | 2015 |
| In healthy adults, is provision of nutritional support effective for following low dietary sodium intake?                                                                                                                                                             | Cardiovascular Disease | Behavioral | 11   |    | Not Available                             | New Zealand | Non-randomized                   | University         | 2015 |
| Influence of habitual dietary fibre intake on the responsiveness of the gut microbiota to a prebiotic                                                                                                                                                                 | Cardiovascular Disease | Behavioral | 45   | 3  | Maori                                     | New Zealand | Randomized, Parallel Assignment  | Research Institute | 2015 |
| Using robots to reduce hospitalisations in patients with Chronic Obstructive Pulmonary Disease (COPD).                                                                                                                                                                | Respiratory Disease    | Other      | 60   | 23 | Maori and Pacific Islander                | New Zealand | Randomized, Parallel Assignment  | HRC                | 2015 |

|                                                                                                                                                                        |                        |                |     |    |                                                                             |             |                                      |                    |      |
|------------------------------------------------------------------------------------------------------------------------------------------------------------------------|------------------------|----------------|-----|----|-----------------------------------------------------------------------------|-------------|--------------------------------------|--------------------|------|
| A study designed to test a new oxygen delivery device (NHFO2) in patients with long term respiratory disease who require home oxygen.                                  | Respiratory Disease    | Device         | 12  |    | Not Available                                                               | New Zealand | Single Group Assignment              | Industry           | 2017 |
| Comfort comparison of two bi-level devices in patients with chronic respiratory diseases.                                                                              | Respiratory Disease    | Device         | 30  | 6  | Maori and Pacific                                                           | New Zealand | Randomized, Crossover Assignment     | Industry           | 2017 |
| Effect of prolonged fasting on blood sugars in overweight/obese volunteers with type 2 diabetes                                                                        | Diabetes               | Behavioral     | 16  |    | Not Available                                                               | New Zealand | Randomized, Crossover Assignment     | University         | 2017 |
| Exergaming for people with knee osteoarthritis: a feasibility study                                                                                                    | Arthritis              | Rehabilitation | 23  | 0  |                                                                             | New Zealand | Randomized, Parallel Assignment      | Industry           | 2017 |
| Food 4 Health: using probiotics and prebiotic cereals to reduce blood sugar levels in adults at risk of developing type 2 diabetes<br>He Oranga Kai                    | Diabetes               | Behavioral     | 153 |    | Not Available                                                               | New Zealand | Randomized, Factorial Assignment     | HRC                | 2017 |
| A placebo-controlled, single-blind, crossover study to assess the effects of New Zealand pine bark extract (Enzogenol®) on glycaemic responses in healthy participants | Diabetes               | Other          | 25  |    | Race and Ethnicity Not Collected                                            | New Zealand | Non-randomized, Crossover Assignment | Industry           | 2018 |
| mobile Pulmonary Rehabilitation - Determining the feasibility and acceptability of an adaptive mobile Pulmonary Rehabilitation (PR) programme                          | Respiratory Disease    | Behavioral     | 30  | 11 | Maori and Pacific                                                           | New Zealand | Non-randomized                       | Research Institute | 2019 |
| 6-week Study Treatment to Evaluate the Safety and Effectiveness of AZD2066 in Patients With Major Depressive Disorder                                                  | Mental Illness         | Drug           | 249 |    | Race and Ethnicity Not Collected                                            | US          | Randomized, Parallel Assignment      | Industry           | 2010 |
| A 6-week Study in Asthmatic Children Aged 6 to <12 Yrs Comparing Budesonide pMDI 160ug Twice Daily With Placebo                                                        | Respiratory Disease    | Drug           | 304 | 1  | Native Hawaiian or Other Pacific Islander                                   | US          | Randomized, Parallel Assignment      | Industry           | 2010 |
| A Study in Participants With Type 2 Diabetes Mellitus (AWARD-4)                                                                                                        | Diabetes               | Drug           | 884 | 47 | American Indian or Alaska Native, Native Hawaiian or Other Pacific Islander | US          | Randomized, Parallel Assignment      | Industry           | 2010 |
| A Study of Carfilzomib vs Best Supportive Care in Subjects With Relapsed and Refractory Multiple Myeloma                                                               | Cardiovascular Disease | Drug           | 315 | 0  |                                                                             | US          | Randomized, Parallel Assignment      | Industry           | 2010 |
| A Study of First-Line Ambrisentan and Tadalafil Combination Therapy in Subjects With Pulmonary Arterial Hypertension (PAH)                                             | Respiratory Disease    | Drug           | 610 | 5  | American Indian or Alaska Native, Native Hawaiian or Other Pacific Islander | US          | Randomized, Parallel Assignment      | Industry           | 2010 |

|                                                                                                                    |                        |            |     |   |                                                                             |    |                                         |                    |      |
|--------------------------------------------------------------------------------------------------------------------|------------------------|------------|-----|---|-----------------------------------------------------------------------------|----|-----------------------------------------|--------------------|------|
| A Study of LY2216684 and Digoxin in Healthy Subjects                                                               | Mental Illness         | Drug       | 30  | 0 |                                                                             | US | Non-randomized, Single Group Assignment | Industry           | 2010 |
| A Study to Evaluate the Effects of Milnacipran on Pain Processing and Functional MRI in Patients With Fibromyalgia | Arthritis              | Drug       | 22  |   | Race and Ethnicity Not Collected                                            | US | Randomized, Crossover Assignment        | University         | 2010 |
| ADAPT: Addressing Depression and Pain Together                                                                     | Mental Illness         | Drug       | 139 |   | Race and Ethnicity Not Collected                                            | US | Randomized, Parallel Assignment         | University         | 2010 |
| Alefacept and Allogeneic Hematopoietic Stem Cell Transplantation                                                   | Cardiovascular Disease | Drug       | 3   |   | Race and Ethnicity Not Collected                                            | US | Single Group Assignment                 | University         | 2010 |
| Aminophylline to Prevent Acute Kidney Injury in Children After Cardiac Surgery                                     | Kidney Disease         | Drug       | 144 |   | Race and Ethnicity Not Collected                                            | US | Randomized, Parallel Assignment         | University         | 2010 |
| An Advanced Echocardiographic Evaluation of Nebivolol                                                              | Hypertension           | Drug       | 2   |   | Race and Ethnicity Not Collected                                            | US | Single Group Assignment                 | Industry           | 2010 |
| Aqueous Humor Dynamics and Brimonidine                                                                             | Hypertension           | Drug       | 35  | 1 | Native American                                                             | US | Randomized, Crossover Assignment        | University         | 2010 |
| Ascorbic Acid (Vitamin C) Infusion in Human Sepsis                                                                 | Respiratory Disease    | Drug       | 24  | 0 |                                                                             | US | Single Group Assignment                 | University         | 2010 |
| Calorie Restriction and Changes in Body Composition, Disease, Function, and Quality of Life in Older Adults        | Cardiovascular Disease | Behavioral | 167 | 0 |                                                                             | US | Randomized, Factorial Assignment        | University         | 2010 |
| Carvedilol for Psychostimulant Dependence                                                                          | Mental Illness         | Drug       | 32  | 0 |                                                                             | US | Randomized, Parallel Assignment         | NIH                | 2010 |
| Clinical Trial of Pioglitazone for Prevention of Cardiac Allograft Vasculopathy After Heart Transplantation        | Cardiovascular Disease | Drug       | 18  |   | Race and Ethnicity Not Collected                                            | US | Randomized, Parallel Assignment         | University         | 2010 |
| Comparing Self Monitored Blood Glucose (SMBG) to Continuous Glucose Monitoring (CGM) in Type 2 Diabetes            | Diabetes               | Device     | 124 |   | Race and Ethnicity Not Collected                                            | US | Randomized, Parallel Assignment         | Research Institute | 2010 |
| Comparison of Couple-Based PTSD Treatment and Couple-Based PTSD Education                                          | Mental Illness         | Behavioral | 138 | 4 | American Indian or Alaska Native, Native Hawaiian or Other Pacific Islander | US | Randomized, Parallel Assignment         | Research Institute | 2010 |
| Comparison of Intravenous Adenosine Infusion With Regadenoson Bolus for Inducing Maximal Coronary Hyperemia        | Cardiovascular Disease | Drug       | 46  | 0 |                                                                             | US | Single Group Assignment                 | University         | 2010 |
| Comparison of Surgical Time and Efficiency of Total Knee Arthroplasty                                              | Arthritis              | Other      | 30  |   | Race and Ethnicity Not Collected                                            | US | Non-Randomized,                         | Industry           | 2010 |

|                                                                                                                                     |                        |            |     |    |                                                                             |    |                                     |                    |      |
|-------------------------------------------------------------------------------------------------------------------------------------|------------------------|------------|-----|----|-----------------------------------------------------------------------------|----|-------------------------------------|--------------------|------|
|                                                                                                                                     |                        |            |     |    |                                                                             |    | Parallel Assignment                 |                    |      |
| Corticotropin-Releasing Hormone Receptor 1 (CRH1) Antagonism in Anxious Alcoholics^                                                 | Mental Illness         | Drug       | 70  | 0  |                                                                             | US | Randomized, Parallel Assignment     | NIH                | 2010 |
| Drum-Assisted Therapy for Native Americans                                                                                          | Mental Illness         | Other      | 10  | 10 | Native Americans                                                            | US | Randomized, Parallel Assignment     | University         | 2010 |
| Effects of Mindfulness-Based Cognitive-Behavioral Conjoint Therapy on PTSD and Relationship Function                                | Mental Illness         | Behavioral | 92  | 0  |                                                                             | US | Randomized, Parallel Assignment     | Research Institute | 2010 |
| Efficacy and Safety of Empagliflozin (BI 10773) in Type 2 Diabetes Patients on a Background of Pioglitazone Alone or With Metformin | Diabetes               | Drug       | 499 | 2  | American Indian or Alaska Native                                            | US | Randomized, Parallel Assignment     | Industry           | 2010 |
| Epoprostenol for Injection in Patients With Pulmonary Arterial Hypertension                                                         | Respiratory Disease    | Drug       | 30  |    | Race and Ethnicity Not Collected                                            | US | Randomized, Parallel Assignment     | Industry           | 2010 |
| Epoprostenol for Injection in Pulmonary Arterial Hypertension - Extension of AC-066A401                                             | Respiratory Disease    | Drug       | 2   |    | Race and Ethnicity Not Collected                                            | US | Non-randomized, Parallel Assignment | Industry           | 2010 |
| Evaluation of Therapeutic Plasma Exchange (TPE) Procedure Using the AMICUS Device                                                   | Kidney Disease         | Device     | 37  |    | Race and Ethnicity Not Collected                                            | US | Randomized, Crossover Assignment    | Industry           | 2010 |
| Event Marker Ingested To Trigger Event Recorder 3.0 Psychiatry Study                                                                | Mental Illness         | Other      | 28  | 1  | Native American                                                             | US | Single Group Assignment             | Hospital           | 2010 |
| Extended Follow-up of Patients With Macular Edema Due to Retinal Vein Occlusion                                                     | Cardiovascular Disease | Drug       | 66  | 0  |                                                                             | US | Single Group Assignment             | University         | 2010 |
| Identifying Treatments to Motivate Smokers to Quit                                                                                  | Mental Illness         | Drug       | 517 | 0  |                                                                             | US | Randomized, Factorial Assignment    | University         | 2010 |
| Impact of Exenatide on Cardiovascular Exercise Performance in Type 2 Diabetes                                                       | Diabetes               | Drug       | 23  |    | Race and Ethnicity Not Collected                                            | US | Randomized, Parallel Assignment     | University         | 2010 |
| Intravitreal Ranibizumab for Vitreous Hemorrhage Due to Proliferative Diabetic Retinopathy (N)                                      | Diabetes               | Drug       | 261 | 5  | American Indian or Alaska Native, Native Hawaiian or Other Pacific Islander | US | Randomized, Parallel Assignment     | NIH                | 2010 |
| Investigation of Mifepristone (RU486) on Stress Sensitivity and Relapse Prevention in Cocaine Dependent Patients                    | Mental Illness         | Drug       | 58  | 0  |                                                                             | US | Randomized, Parallel Assignment     | Research Institute | 2010 |
| Investigation of the Efficacy of Antibiotics on Pulmonary Sarcoidosis                                                               | Respiratory Disease    | Drug       | 15  | 0  |                                                                             | US | Single Group Assignment             | University         | 2010 |

|                                                                                                                                                                                               |                        |           |      |   |                                                                             |    |                                     |                    |      |
|-----------------------------------------------------------------------------------------------------------------------------------------------------------------------------------------------|------------------------|-----------|------|---|-----------------------------------------------------------------------------|----|-------------------------------------|--------------------|------|
| Investigator Sponsored Trial of Polypoidal Choroidal Vasculopathy (PCV) Evaluation Assessing High-Dose Ranibizumab Prospectively (PEARL2)                                                     | Cardiovascular Disease | Drug      | 24   | 0 |                                                                             | US | Non-randomized, Parallel Assignment | Industry           | 2010 |
| Nebivolol Effect on Nitric Oxide Levels, Blood Pressure, and Renal Function in Kidney Transplant Patients                                                                                     | Hypertension           | Drug      | 32   | 0 |                                                                             | US | Randomized, Parallel Assignment     | University         | 2010 |
| Ocular Surface Tolerability Study of Prostaglandin Analogues in Patients With Open-Angle Glaucoma or Ocular Hypertension                                                                      | Hypertension           | Drug      | 164  |   | Race and Ethnicity Not Collected                                            | US | Randomized, Parallel Assignment     | Industry           | 2010 |
| Pilot of Acupuncture to Improve Quality of Life in Veterans With TBI and PTSD                                                                                                                 | Mental Illness         | Drug      | 34   |   | Race and Ethnicity Not Collected                                            | US | Single Group Assignment             | Research Institute | 2010 |
| Randomized Control Trial of Fluid Therapy for Pediatric Diabetic Ketoacidosis                                                                                                                 | Diabetes               | Drug      | 1389 | 0 |                                                                             | US | Randomized, Factorial Assignment    | NIH                | 2010 |
| Ranolazine and Pulmonary Hypertension                                                                                                                                                         | Respiratory Disease    | Drug      | 11   | 0 |                                                                             | US | Single Group Assignment             | University         | 2010 |
| Safety and Efficacy of AGN-210961 Ophthalmic Solution Compared With Bimatoprost Ophthalmic Solution in Patients With Glaucoma or Ocular Hypertension                                          | Hypertension           | Drug      | 163  |   | Race and Ethnicity Not Collected                                            | US | Randomized, Parallel Assignment     | Industry           | 2010 |
| Safety and Efficacy of Vortioxetine (Lu AA21004) in Adults With Major Depressive Disorder                                                                                                     | Mental Illness         | Drug      | 614  | 1 | American Indian or Alaska Native                                            | US | Randomized, Parallel Assignment     | Industry           | 2010 |
| Safety and Efficacy Study of Vortioxetine (Lu AA21004) in Adults With Major Depressive Disorder                                                                                               | Mental Illness         | Drug      | 469  | 3 | American Indian or Alaska Native                                            | US | Randomized, Parallel Assignment     | Industry           | 2010 |
| Safety and Pharmacodynamics Study of AGN-207281 Ophthalmic Solutions Compared With Timolol Ophthalmic Solution or Placebo in Patients With Ocular Hypertension or Primary Open-Angle Glaucoma | Hypertension           | Drug      | 50   |   | Race and Ethnicity Not Collected                                            | US | Randomized, Parallel Assignment     | Industry           | 2010 |
| Safety Study of Escitalopram in Children 7 to 11 Years of Age With Major Depressive Disorder                                                                                                  | Mental Illness         | Drug      | 162  | 2 | American Indian or Alaska Native, Native Hawaiian or Other Pacific Islander | US | Single Group Assignment             | Industry           | 2010 |
| School-Based Preventive Asthma Care Technology: A Trial Using a Novel Technology to Improve Adherence                                                                                         | Respiratory Disease    | Other     | 99   | 0 |                                                                             | US | Randomized, Parallel Assignment     | NIH                | 2010 |
| Stereotactic Body Radiation Therapy (SBRT) in Metastatic Non-small Cell Lung Cancer                                                                                                           | Respiratory Disease    | Radiation | 29   | 0 |                                                                             | US | Single Group Assignment             | University         | 2010 |
| Sunitinib Malate in Treating Patients With Previously Untreated Metastatic Kidney Cancer                                                                                                      | Kidney Disease         | Drug      | 37   | 0 |                                                                             | US | Single Group Assignment             | Industry           | 2010 |
| Systolic Blood Pressure Intervention Trial                                                                                                                                                    | Hypertension           | Drug      | 9361 | 0 |                                                                             | US | Randomized, Parallel Assignment     | NIH                | 2010 |

|                                                                                                                                                                        |                        |            |      |     |                                                                             |    |                                  |            |      |
|------------------------------------------------------------------------------------------------------------------------------------------------------------------------|------------------------|------------|------|-----|-----------------------------------------------------------------------------|----|----------------------------------|------------|------|
| Testosterone Replacement in Men With Diabetes and Obesity                                                                                                              | Diabetes               | Drug       | 144  |     | Race and Ethnicity Not Collected                                            | US | Randomized, Parallel Assignment  | NIH        | 2010 |
| Tetrahydrobiopterin Treatment in Children With Idiopathic Cognitive Developmental Disorders                                                                            | Mental Illness         | Drug       | 10   |     | Race and Ethnicity Not Collected                                            | US | Single Group Assignment          | University | 2010 |
| The Influence of Smoking Status on Prasugrel and Clopidogrel Treated Subjects Taking Aspirin and Having Stable Coronary Artery Disease                                 | Cardiovascular Disease | Drug       | 110  | 2   | American Indian or Alaska Native                                            | US | Randomized, Crossover Assignment | Industry   | 2010 |
| The Intravascular Cooling in the Treatment of Stroke 2/3 Trial                                                                                                         | Cardiovascular Disease | Device     | 120  |     | Race and Ethnicity Not Collected                                            | US | Randomized, Factorial Assignment | NIH        | 2010 |
| Treatment of Patients Undergoing Primary Unilateral Elective Total Knee or Hip Replacement With Dabigatran Etexilate                                                   | Kidney Disease         | Drug       | 112  |     | Race and Ethnicity Not Collected                                            | US | Single Group Assignment          | Industry   | 2010 |
| Trial of Citicoline Therapy in Patients With Mania or Hypomania and Cocaine Abuse/Dependence                                                                           | Mental Illness         | Drug       | 44   |     | Race and Ethnicity Not Collected                                            | US | Randomized, Parallel Assignment  | University | 2010 |
| Trial of ID-Specific Donor Vaccinated Lymphocyte Infusion for Patients With Myeloma Relapsing or Failing to Achieve a Complete Remission After an Allogenic Transplant | Cardiovascular Disease | Biological | 2    | 0   |                                                                             | US | Single Group Assignment          | Industry   | 2010 |
| Using Computers to Assist in the Diagnosis and Treatment of Attention-deficit/Hyperactivity Disorder (ADHD)                                                            | Mental Illness         | Other      | 84   | 0   |                                                                             | US | Randomized, Parallel Assignment  | NIH        | 2010 |
| 6-month Safety and Benefit Study of ADVAIR in Children 4-11 Years Old                                                                                                  | Respiratory Disease    | Drug       | 6250 | 268 | American Indian or Alaska Native, Native Hawaiian or Other Pacific Islander | US | Randomized, Parallel Assignment  | Industry   | 2011 |
| A 12 Week Study to Assess Changes in Joint Inflammation Using Ultrasonography in Patients With Rheumatoid Arthritis (RA)                                               | Arthritis              | Biological | 3    |     | Race and Ethnicity Not Collected                                            | US | Single Group Assignment          | Industry   | 2011 |
| A 24-week Arterial Stiffness Study With Fluticasone Furoate/Vilanterol in COPD                                                                                         | Respiratory Disease    | Drug       | 430  | 0   |                                                                             | US | Randomized, Parallel Assignment  | Industry   | 2011 |
| A Multiple Dose Study Of PF-04620110 In Type 2 Diabetes Patients                                                                                                       | Diabetes               | Drug       | 48   |     | Race and Ethnicity Not Collected                                            | US | Randomized, Parallel Assignment  | Industry   | 2011 |
| A Phase 3 Multi-center Study to Assess PET Imaging of Flurpiridaz F 18 Injection in Patients With CAD.                                                                 | Cardiovascular Disease | Drug       | 795  | 6   | American Indian or Alaska Native, Native Hawaiian or Other Pacific Islander | US | Single Group Assignment          | Industry   | 2011 |

|                                                                                                                                                                                                                                                                 |                        |            |      |    |                                                                             |    |                                  |            |      |
|-----------------------------------------------------------------------------------------------------------------------------------------------------------------------------------------------------------------------------------------------------------------|------------------------|------------|------|----|-----------------------------------------------------------------------------|----|----------------------------------|------------|------|
| A Study in Prevention of Re-emergence of Depression Symptoms                                                                                                                                                                                                    | Mental Illness         | Drug       | 1249 | 50 | American Indian or Alaska Native                                            | US | Randomized, Parallel Assignment  | Industry   | 2011 |
| A Study of Cariprazine in the Prevention of Relapse of Symptoms in Participants With Schizophrenia                                                                                                                                                              | Mental Illness         | Drug       | 765  | 1  | Native Hawaiian or other Pacific Islander                                   | US | Randomized, Parallel Assignment  | Industry   | 2011 |
| A Study of Hypertonic Saline for Infants Hospitalized With Bronchiolitis                                                                                                                                                                                        | Respiratory Disease    | Drug       | 227  | 0  |                                                                             | US | Randomized, Parallel Assignment  | Industry   | 2011 |
| A Study of Intravenous Zanamivir Versus Oral Oseltamivir in Adults and Adolescents Hospitalized With Influenza                                                                                                                                                  | Respiratory Disease    | Drug       | 626  | 12 | American Indian or Alaska Native, Native Hawaiian or Other Pacific Islander | US | Randomized, Parallel Assignment  | Industry   | 2011 |
| A Study of LY2127399 in Participants With Systemic Lupus Erythematosus                                                                                                                                                                                          | Arthritis              | Drug       | 1124 | 97 | American Indian or Alaska Native, Native Hawaiian or Other Pacific Islander | US | Randomized, Parallel Assignment  | Industry   | 2011 |
| A Study of LY2216684 in Healthy Females                                                                                                                                                                                                                         | Mental Illness         | Drug       | 20   | 0  |                                                                             | US | Randomized, Crossover Assignment | Industry   | 2011 |
| A Study of RoActemra/Actemra (Tocilizumab) Versus Adalimumab in Combination With Methotrexate (MTX) in Patients With Moderate to Severe Active Rheumatoid Arthritis And an Inadequate Response to Treatment With Only One Tumor Necrosis Factor (TNF)-Inhibitor | Arthritis              | Drug       | 96   |    | Race and Ethnicity Not Collected                                            | US | Randomized, Parallel Assignment  | Industry   | 2011 |
| A Study of the Effect of MK-8457 on Blood Pressure in Hypertensive Participants (MK-8457-004-AM1)                                                                                                                                                               | Hypertension           | Drug       | 31   |    | Race and Ethnicity Not Collected                                            | US | Randomized, Crossover Assignment | Industry   | 2011 |
| A Study of the Safety and Efficacy of Bimatoprost Ophthalmic Solution in Paediatric Patients With Glaucoma                                                                                                                                                      | Hypertension           | Drug       | 6    |    | Race and Ethnicity Not Collected                                            | US | Randomized, Parallel Assignment  | Industry   | 2011 |
| Addiction Housing Case Management for Homeless Veterans                                                                                                                                                                                                         | Mental Illness         | Behavioral | 181  | 8  | Native American, Asian/Pacific Islander                                     | US | Randomized, Parallel Assignment  | Industry   | 2011 |
| Adjunctive Minocycline in Clozapine Treated Schizophrenia Patients                                                                                                                                                                                              | Mental Illness         | Drug       | 52   | 0  |                                                                             | US | Randomized, Parallel Assignment  | NIH        | 2011 |
| Antiplatelet Therapy Guided by Thrombelastography in Patients With Acute Coronary Syndromes (TEGCOR Study)                                                                                                                                                      | Cardiovascular Disease | Drug       | 67   | 0  |                                                                             | US | Randomized, Parallel Assignment  | University | 2011 |

|                                                                                                        |                        |            |      |    |                                                                             |    |                                  |                    |      |
|--------------------------------------------------------------------------------------------------------|------------------------|------------|------|----|-----------------------------------------------------------------------------|----|----------------------------------|--------------------|------|
| Asenapine in the Treatment of Older Adults With Bipolar Disorder                                       | Mental Illness         | Drug       | 15   | 0  |                                                                             | US | Single Group Assignment          | University         | 2011 |
| Beating the Blues for Your Heart                                                                       | Mental Illness         | Behavioral | 29   |    | Race and Ethnicity Not Collected                                            | US | Randomized, Parallel Assignment  | University         | 2011 |
| Blacks and Exacerbations on Long Acting Beta Agonists (LABA) vs. Tiotropium (BELT)                     | Respiratory Disease    | Drug       | 1070 | 0  |                                                                             | US | Randomized, Parallel Assignment  | Hospital           | 2011 |
| Blood Pressure Telemonitoring and Goal Blood Pressure in Diabetes                                      | Diabetes               | Device     | 50   |    | Race and Ethnicity Not Collected                                            | US | Randomized, Parallel Assignment  | Hospital           | 2011 |
| Bronchoscopic Intratumoral Chemotherapy for Small Cell Lung Cancer (SCLC)                              | Respiratory Disease    | Drug       | 4    |    | Race and Ethnicity Not Collected                                            | US | Single Group Assignment          | University         | 2011 |
| Bupropion for Smoking Cessation During Pregnancy                                                       | Mental Illness         | Drug       | 65   | 0  |                                                                             | US | Randomized, Parallel Assignment  | NIH                | 2011 |
| Cardiovascular Intervention Improvement Telemedicine Study                                             | Cardiovascular Disease | Behavioral | 428  | 0  |                                                                             | US | Randomized, Parallel Assignment  | Research Institute | 2011 |
| Carotid Artery Stenting Outcomes in the Standard Risk Population for Carotid Endarterectomy            | Cardiovascular Disease | Device     | 1203 | 11 | American Indian or Alaska Native, Native Hawaiian or Other Pacific Islander | US | Single Group Assignment          | Industry           | 2011 |
| Clinical Pharmacology of Aliskiren in Combination With Cyclosporine in Cardiac Transplantation         | Hypertension           | Drug       | 1    |    | Race and Ethnicity Not Collected                                            | US | Single Group Assignment          | University         | 2011 |
| Combination Immunotherapy and Autologous Stem Cell Transplantation for Myeloma                         | Cardiovascular Disease | Biological | 27   | 0  |                                                                             | US | Single Group Assignment          | University         | 2011 |
| Comparison of 2 Beta Blocker Drugs on Peripheral Arterial Disease in Patients With High Blood Pressure | Cardiovascular Disease | Drug       | 17   | 0  |                                                                             | US | Randomized, Parallel Assignment  | University         | 2011 |
| Computerized Cognitive Behavioral Therapy for Childhood Anxiety in Community Health Centers            | Mental Illness         | Behavioral | 100  | 3  | Asian/Pacific Islander                                                      | US | Randomized, Parallel Assignment  | University         | 2011 |
| Cortisol Suppression and Startle Responses in Posttraumatic Stress Disorder (PTSD)                     | Mental Illness         | Drug       | 165  | 0  |                                                                             | US | Randomized, Crossover Assignment | NIH                | 2011 |
| Diagnostic Device Risk Management of Atrial Fibrillation and Heart Failure                             | Cardiovascular Disease | Device     | 24   | 0  |                                                                             | US | Randomized, Parallel Assignment  | Industry           | 2011 |
| Dipeptidyl Peptidase-4 Inhibitor (Sitagliptin) Therapy in the Inpatients With Type 2 Diabetes          | Diabetes               | Drug       | 90   |    | Race and Ethnicity Not Collected                                            | US | Randomized, Parallel Assignment  | University         | 2011 |



|                                                                                                                                   |                        |                    |     |   |                                  |    |                                  |                    |      |
|-----------------------------------------------------------------------------------------------------------------------------------|------------------------|--------------------|-----|---|----------------------------------|----|----------------------------------|--------------------|------|
| Dosing Study of Ranibizumab for Diabetic Retinal and Macular Edema                                                                | Diabetes               | Drug               | 20  |   | Race and Ethnicity Not Collected | US | Randomized, Parallel Assignment  | Industry           | 2011 |
| Early Intervention in Cystic Fibrosis Exacerbation                                                                                | Respiratory Disease    | Device             | 267 | 0 |                                  | US | Randomized, Parallel Assignment  | NIH                | 2011 |
| Effect of Ketoconazole on Breathlessness                                                                                          | Respiratory Disease    | Drug               | 20  |   | Race and Ethnicity Not Collected | US | Randomized, Crossover Assignment | Hospital           | 2011 |
| Effects of Febuxostat on Adipokines and Kidney Disease in Diabetic Chronic Kidney Disease                                         | Kidney Disease         | Drug               | 80  | 0 |                                  | US | Randomized, Parallel Assignment  | University         | 2011 |
| Efficacy and Safety of Colchicine for the Prevention of Gout Flares During the Initiation of Allopurinol                          | Arthritis              | Drug               | 82  |   | Race and Ethnicity Not Collected | US | Randomized, Parallel Assignment  | Industry           | 2011 |
| Efficacy and Tolerability of Riluzole in Treatment Resistant Depression                                                           | Mental Illness         | Drug               | 104 |   | Race and Ethnicity Not Collected | US | Randomized, Parallel Assignment  | University         | 2011 |
| Efficacy of an Intravitreal DEX Implant in Retinal Vein Occlusion Following Treatment With Anti-VEGF Injections.                  | Cardiovascular Disease | Drug               | 10  |   | Race and Ethnicity Not Collected | US | Randomized, Parallel Assignment  | Research Institute | 2011 |
| Endothelial Facilitation in Alzheimer's Disease                                                                                   | Mental Illness         | Drug               | 11  | 0 |                                  | US | Single Group Assignment          | University         | 2011 |
| Erlotinib Plus Tivantinib (ARQ 197) Versus Single Agent Chemotherapy in Locally Advanced or Metastatic Non-Small Cell Lung Cancer | Respiratory Disease    | Drug               | 96  | 0 |                                  | US | Randomized, Parallel Assignment  | Industry           | 2011 |
| Evaluation of Efficacy of Experimental Gel to Foam Dentifrices in Dental Erosion                                                  | Dental Disease         | Drug               | 56  |   | Race and Ethnicity Not Collected | US | Randomized, Crossover Assignment | Industry           | 2011 |
| Feasibility of Delivering a Quitline Based Smoking Cessation Intervention in Cancer Patients                                      | Respiratory Disease    | Drug               | 146 | 2 | American Indian or Alaska Native | US | Randomized, Parallel Assignment  | NIH                | 2011 |
| Galvanic Vestibular Stimulation and Motor Training in Traumatic Brain Injury Survivors                                            | Mental Illness         | Device             | 7   | 0 |                                  | US | Randomized, Parallel Assignment  | Hospital           | 2011 |
| Green Tea Lozenges for the Management of Dry Mouth                                                                                | Arthritis              | Dietary Supplement | 60  |   | Race and Ethnicity Not Collected | US | Randomized, Parallel Assignment  | Industry           | 2011 |
| Group Physical Therapy for Knee Osteoarthritis                                                                                    | Arthritis              | Other              | 320 | 0 |                                  | US | Randomized, Parallel Assignment  | Research Institute | 2011 |
| How Accurately Does the Diopsys Visual Evoked Potential (VEP) Vision Testing System Detect Glaucoma?                              | Hypertension           | Diagnosis          | 136 | 0 |                                  | US | Randomized, Parallel Assignment  | Industry           | 2011 |
| IL1-TRAP, Rilonacept, in Systemic Sclerosis                                                                                       | Arthritis              | Drug               | 24  |   | Race and Ethnicity Not Collected | US | Randomized, Parallel Assignment  | University         | 2011 |

|                                                                                                                        |                     |            |     |   |                                           |    |                                     |                    |      |
|------------------------------------------------------------------------------------------------------------------------|---------------------|------------|-----|---|-------------------------------------------|----|-------------------------------------|--------------------|------|
| Imatinib and Rituximab in Treating Cutaneous Sclerosis in Patients With Chronic Graft-Versus-Host Disease              | Arthritis           | Drug       | 72  |   | Race and Ethnicity Not Collected          | US | Randomized, Crossover Assignment    | NIH                | 2011 |
| Improving Obesity Self-Care Among Mentally Ill Veterans                                                                | Mental Illness      | Behavioral | 44  | 2 | Native Hawaiian or other Pacific Islander | US | Randomized, Parallel Assignment     | Research Institute | 2011 |
| Inducing Remission in Type 1 Diabetes With Alefacept                                                                   | Diabetes            | Drug       | 49  | 0 |                                           | US | Randomized, Parallel Assignment     | NIH                | 2011 |
| Intervening in Diabetes With Healthy Eating, Activity, and Linkages To Healthcare - The I-D-HEALTH Study               | Diabetes            | Behavioral | 331 | 0 |                                           | US | Randomized, Parallel Assignment     | NIH                | 2011 |
| Life Goals Collaborative Care to Improve Health Outcomes in Mental Disorders                                           | Mental Illness      | Behavioral | 304 | 0 |                                           | US | Randomized, Parallel Assignment     | Research Institute | 2011 |
| Lower Extremity Splinting to Manage Pain and Sleep Disturbances Associated With HIV/AIDS Related Peripheral Neuropathy | Mental Illness      | Device     | 46  | 0 |                                           | US | Randomized, Parallel Assignment     | University         | 2011 |
| Medicinal Nicotine for Preventing Stress Induced Craving and Withdrawal Symptoms                                       | Mental Illness      | Drug       | 98  | 3 | American Indian or Alaska Native          | US | Randomized, Crossover Assignment    | NIH                | 2011 |
| Metformin and Transient Hyperglycemia                                                                                  | Diabetes            | Drug       | 4   |   | Race and Ethnicity Not Collected          | US | Single Group Assignment             | Hospital           | 2011 |
| Milnacipran in the Treatment of Widespread, Non-Joint Pain in Rheumatoid Arthritis                                     | Arthritis           | Drug       | 49  | 0 |                                           | US | Randomized, Crossover Assignment    | NIH                | 2011 |
| Minocycline for Bipolar Depression                                                                                     | Mental Illness      | Drug       | 20  | 0 |                                           | US | Single Group Assignment             | University         | 2011 |
| Modulation of Autophagy in Patients With Advanced/Recurrent Non-small Cell Lung Cancer - Phase II                      | Respiratory Disease | Drug       | 32  | 0 |                                           | US | Non-randomized, Parallel Assignment | NIH                | 2011 |
| Monoamine Contributions to Neurocircuitry in Eating Disorders                                                          | Mental Illness      | Drug       | 88  | 0 |                                           | US | Single Group Assignment             | NIH                | 2011 |
| Patient and Provider Interventions for Managing Osteoarthritis in Primary Care                                         | Arthritis           | Behavioral | 300 | 3 | American Indian or Alaska Native          | US | Randomized, Parallel Assignment     | Research Institute | 2011 |
| PD-1 Alone or With Dendritic Cell/Renal Cell Carcinoma Fusion Cell Vaccine                                             | Kidney Disease      | Drug       | 11  |   | Race and Ethnicity Not Collected          | US | Non-randomized, Parallel Assignment | NIH                | 2011 |
| PET/CT Assessment of Tumor Perfusion in Patients With Renal Cell Carcinoma                                             | Kidney Disease      | Drug       | 14  | 0 |                                           | US | Single Group Assignment             | University         | 2011 |
| Pharmacokinetics/Pharmacodynamics of Albiglutide                                                                       | Diabetes            | Biological | 283 | 2 | American Indian or Alaska Native,         | US | Randomized, Parallel Assignment     | Industry           | 2011 |

|                                                                                                                                                    |                        |            |       |      |  |                                                                             |    |                                  |                    |      |
|----------------------------------------------------------------------------------------------------------------------------------------------------|------------------------|------------|-------|------|--|-----------------------------------------------------------------------------|----|----------------------------------|--------------------|------|
|                                                                                                                                                    |                        |            |       |      |  | Native Hawaiian or Other Pacific Islander                                   |    |                                  |                    |      |
| Pilot Study of Using Copeptin to Predict Response to Tolvaptan                                                                                     | Cardiovascular Disease | Drug       | 21    | 0    |  |                                                                             | US | Single Group Assignment          | University         | 2011 |
| Pioglitazone in Patients With Mood Disorders                                                                                                       | Mental Illness         | Drug       | 37    | 0    |  |                                                                             | US | Randomized, Parallel Assignment  | NIH                | 2011 |
| Practice Effects and Amyloid Imaging Using 18F-PIB or Flutemetamol PET and FDG-PET                                                                 | Mental Illness         | Drug       | 27    | 0    |  |                                                                             | US | Single Group Assignment          | University         | 2011 |
| Preventing Cognitive Decline in African Americans With Mild Cognitive Impairment                                                                   | Mental Illness         | Behavioral | 221   | 0    |  |                                                                             | US | Randomized, Parallel Assignment  | University         | 2011 |
| Prevention of Post-operative Pneumonia (POPP)                                                                                                      | Respiratory Disease    | Drug       | 150   | 0    |  |                                                                             | US | Single Group Assignment          | University         | 2011 |
| PROlonGed ExpoSure Sertraline                                                                                                                      | Mental Illness         | Drug       | 223   | 0    |  |                                                                             | US | Randomized, Parallel Assignment  | Research Institute | 2011 |
| Promoting Adherence to Improve Effectiveness of Cardiovascular Disease Therapies                                                                   | Cardiovascular Disease | Other      | 21752 | 2538 |  | American Indian or Alaska Native, Native Hawaiian or Other Pacific Islander | US | Randomized, Parallel Assignment  | Research Institute | 2011 |
| Recording for Potential AF Drivers and Patient Specific Atrial Anatomy & Atrial Electrogram Maps                                                   | Cardiovascular Disease | Procedure  | 78    |      |  | Race and Ethnicity Not Collected                                            | US | Single Group Assignment          | University         | 2011 |
| Reduced Intensity Double Umbilical Cord Blood Transplantation                                                                                      | Cardiovascular Disease | Drug       | 33    | 0    |  |                                                                             | US | Single Group Assignment          | Hospital           | 2011 |
| Reducing Length of Stay for Veterans Hospitalized With Pneumonia                                                                                   | Respiratory Disease    | Other      | 129   |      |  | Race and Ethnicity Not Collected                                            | US | Single Group Assignment          | Research Institute | 2011 |
| Remote Ischemic Preconditioning Prior to Vascular Surgery                                                                                          | Cardiovascular Disease | Procedure  | 201   |      |  | Race and Ethnicity Not Collected                                            | US | Randomized, Parallel Assignment  | Research Institute | 2011 |
| Results of Tc99m-Maraciclatide Scintigraphy in Subjects With Diabetes Mellitus and Heart Failure With Preserved Left Ventricular Ejection Fraction | Diabetes               | Drug       | 4     |      |  | Race and Ethnicity Not Collected                                            | US | Single Group Assignment          | Industry           | 2011 |
| Right Ventricular (RV) Pacing in Early Post-operative Continuous Flow Left Ventricular Assist Device (LVAD)                                        | Cardiovascular Disease | Device     | 3     |      |  | Race and Ethnicity Not Collected                                            | US | Randomized, Parallel Assignment  | University         | 2011 |
| Safety and Effectiveness Study of Intranasal Insulin Glulisine on Cognitive and Memory in Mild-Mod AD Patients.                                    | Mental Illness         | Drug       | 12    |      |  | Race and Ethnicity Not Collected                                            | US | Randomized, Crossover Assignment | Research Institute | 2011 |

|                                                                                                                       |                        |                    |     |   |                                            |    |                                 |                    |      |
|-----------------------------------------------------------------------------------------------------------------------|------------------------|--------------------|-----|---|--------------------------------------------|----|---------------------------------|--------------------|------|
| Safety and Effects of Supplementation With Ergocalciferol on Erythropoietin Dosing in Hemodialysis Patients           | Kidney Disease         | Dietary Supplement | 470 | 0 |                                            | US | Randomized, Parallel Assignment | Industry           | 2011 |
| Safety and Efficacy of BIBF 1120 at High Dose in Idiopathic Pulmonary Fibrosis Patients II                            | Respiratory Disease    | Drug               | 551 | 0 |                                            | US | Randomized, Parallel Assignment | Industry           | 2011 |
| Safety, Tolerability, and Pharmacokinetics of Iloperidone Depot in Schizophrenic Patients                             | Mental Illness         | Drug               | 81  |   | Race and Ethnicity Not Collected           | US | Randomized, Parallel Assignment | Industry           | 2011 |
| Social Work Intervention Focused on Transitions                                                                       | Cardiovascular Disease | Other              | 181 | 8 | Asian/Pacific Islander and Native American | US | Randomized, Parallel Assignment | NIH                | 2011 |
| Study of Nasal Insulin to Fight Forgetfulness - Long-acting Insulin Detemir - 120 Days (SL120)                        | Mental Illness         | Drug               | 36  | 0 |                                            | US | Randomized, Parallel Assignment | University         | 2011 |
| Study of Ranolazine in the Treatment of Pulmonary Hypertension Associated With Diastolic Left Ventricular Dysfunction | Cardiovascular Disease | Drug               | 10  |   | Race and Ethnicity Not Collected           | US | Single Group Assignment         | University         | 2011 |
| Tadalafil for Sarcoidosis Associated Pulmonary Hypertension                                                           | Respiratory Disease    | Drug               | 12  | 0 |                                            | US | Single Group Assignment         | University         | 2011 |
| Tailored Communication to Reduce Cardiovascular Risk                                                                  | Cardiovascular Disease | Behavioral         | 464 | 0 |                                            | Us | Randomized, Parallel Assignment | University         | 2011 |
| T-Cell Depleted Double UCB for Refractory AML                                                                         | Cardiovascular Disease | Drug               | 3   |   | Race and Ethnicity Not Collected           | US | Single Group Assignment         | University         | 2011 |
| Technology-assisted Case Management in Adults With Type 2 Diabetes                                                    | Diabetes               | Behavioral         | 113 | 0 |                                            | US | Randomized, Parallel Assignment | University         | 2011 |
| Telephone Support During Overseas Deployment for Military Spouses                                                     | Mental Illness         | Behavioral         | 161 | 3 | American Indian or Alaska Native           | US | Randomized, Parallel Assignment | Industry           | 2011 |
| The Effect of N-Acetyl Cysteine on Cortical Erosion in Early Stage Schizophrenia                                      | Mental Illness         | Drug               | 60  | 0 |                                            | US | Randomized, Parallel Assignment | Research Institute | 2011 |
| The Health Access and Recovery Peer Program                                                                           | Cardiovascular Disease | Behavioral         | 400 | 0 |                                            | US | Randomized, Parallel Assignment | NIH                | 2011 |
| The Safety and Tolerability of Budesonide Foam in Participants With Active Ulcerative Proctitis or Proctosigmoiditis  | Respiratory Disease    | Drug               | 114 |   | Race and Ethnicity Not Collected           | US | Single Group Assignment         | Industry           | 2011 |
| This Study is Designed to Evaluate PD/PK and Safety of Replagal Manufactured by Two Different Processes.              | Cardiovascular Disease | Biological         | 7   |   | Race and Ethnicity Not Collected           | US | Single Group Assignment         | Industry           | 2011 |
| TIV and High Dose TIV in Subjects With Rheumatoid Arthritis                                                           | Arthritis              | Biological         | 102 | 1 | Native Hawaiian or other Pacific Islander  | US | Randomized, Parallel Assignment | NIH                | 2011 |

|                                                                                                                                                                                                                                                                               |                        |            |      |   |                                           |    |                                  |            |      |
|-------------------------------------------------------------------------------------------------------------------------------------------------------------------------------------------------------------------------------------------------------------------------------|------------------------|------------|------|---|-------------------------------------------|----|----------------------------------|------------|------|
| Treatment for Cannabis Withdrawal and Dependence                                                                                                                                                                                                                              | Mental Illness         | Drug       | 700  |   | Race and Ethnicity Not Collected          | US | Randomized, Parallel Assignment  | NIH        | 2011 |
| Ultrasound Guided Knee Injections in Musculoskeletal Medicine                                                                                                                                                                                                                 | Arthritis              | Procedure  | 63   |   | Race and Ethnicity Not Collected          | US | Randomized, Parallel Assignment  | Industry   | 2011 |
| Use of Santyl in Diabetic Foot Ulcers                                                                                                                                                                                                                                         | Diabetes               | Other      | 55   | 0 |                                           | US | Randomized, Parallel Assignment  | Industry   | 2011 |
| Vagal Nerve Stimulation and Glucose Metabolism                                                                                                                                                                                                                                | Diabetes               | Device     | 7    |   | Race and Ethnicity Not Collected          | US | Randomized, Crossover Assignment | NIH        | 2011 |
| VenaTech Convertible Vena Cava Filter U.S. Multi-Center Clinical Trial                                                                                                                                                                                                        | Respiratory Disease    | Device     | 149  | 0 |                                           | US | Single Group Assignment          | Industry   | 2011 |
| 4 Week Switch Study in Hemodialysis-dependent Subjects With Anemia Associated With Chronic Kidney Disease                                                                                                                                                                     | Kidney Disease         | Drug       | 80   | 1 | American Indian or Alaska Native          | US | Randomized, Parallel Assignment  | Industry   | 2012 |
| 5-Fluorouracil Followed by Interferon-alfa-2b in Previously-treated Metastatic Gastrointestinal, Kidney, or Lung Cancer                                                                                                                                                       | Respiratory Disease    | Drug       | 18   |   | Race and Ethnicity Not Collected          | US | Single Group Assignment          | Industry   | 2012 |
| 8-week Randomized, Open-label Study to Evaluate Food Effect on Efficacy and Safety of Oral Aliskiren 300 mg in Patients With Hypertension                                                                                                                                     | Hypertension           | Drug       | 590  |   | Race and Ethnicity Not Collected          | US | Randomized, Parallel Assignment  | Industry   | 2012 |
| A 12-week Treatment, Multi-center, Randomized, Double-blind, Parallel-group, Placebo and Active Controlled Study to Assess the Efficacy, Safety, and Tolerability of Indacaterol Maleate / Glycopyrronium Bromide in COPD Patients With Moderate to Severe Airflow Limitation | Respiratory Disease    | Drug       | 1042 | 0 |                                           | US | Randomized, Parallel Assignment  | Industry   | 2012 |
| A 3-Month Clinical Trial to Assess the Safety and Efficacy of the OZURDEX® Intraocular Implant in Patients With Diabetes Mellitus                                                                                                                                             | Diabetes               | Drug       | 37   |   | Race and Ethnicity Not Collected          | US | Single Group Assignment          | Industry   | 2012 |
| A 6-Week Study Of PF-05175157 In Type 2 Diabetes Mellitus                                                                                                                                                                                                                     | Diabetes               | Drug       | 19   |   | Race and Ethnicity Not Collected          | US | Randomized, Parallel Assignment  | Industry   | 2012 |
| A Long-term Safety Study of ALKS 9072 (Also Known as ALKS 9070)                                                                                                                                                                                                               | Mental Illness         | Drug       | 478  | 2 | Native Hawaiian or Other Pacific Islander | US | Single Group Assignment          | Industry   | 2012 |
| A Prospective Study Evaluating the Use of Intraoperative Stroke Volume Variation Via the FloTrac Device to Guide Fluid and Vasopressor Management in Head and Neck Free Flaps                                                                                                 | Cardiovascular Disease | Device     | 94   |   | Race and Ethnicity Not Collected          | US | Randomized, Parallel Assignment  | University | 2012 |
| A Study in Rheumatoid Arthritis (RA) Patients to Compare Two Formulations of Adalimumab for Pharmacokinetic, Pharmacodynamic and Safety                                                                                                                                       | Arthritis              | Biological | 100  |   | Race and Ethnicity Not Collected          | US | Randomized, Parallel Assignment  | Industry   | 2012 |
| A Study of Weekly Carfilzomib in Combination With Dexamethasone for Progressive Multiple Myeloma                                                                                                                                                                              | Cardiovascular Disease | Drug       | 116  | 1 | Native Hawaiian or Other Pacific Islander | US | Sequential Assignment            | Industry   | 2012 |

|                                                                                                                                                                                                                            |                        |                     |      |   |                                  |    |                                  |                    |      |
|----------------------------------------------------------------------------------------------------------------------------------------------------------------------------------------------------------------------------|------------------------|---------------------|------|---|----------------------------------|----|----------------------------------|--------------------|------|
| A Study to Assess Regadenoson Administration Following an Inadequate Exercise Stress Test as Compared to Regadenoson Alone for Myocardial Perfusion Imaging (MPI) Using Single Photon Emission Computed Tomography (SPECT) | Cardiovascular Disease | Drug                | 1142 | 0 |                                  | US | Randomized, Parallel Assignment  | Industry           | 2012 |
| A Study to Compare the Effect of Giving Dulaglutide Using an Auto-injector Versus a Manual Syringe                                                                                                                         | Diabetes               | Biological          | 50   | 0 |                                  | US | Randomized, Crossover Assignment | Industry           | 2012 |
| A Study to Determine the Effect of Tiotropium + Olodaterol Fixed Dose Combination on Exercise Endurance Time During Constant Work Rate Cycle Ergometry Test in COPD                                                        | Respiratory Disease    | Device              | 404  |   | Race and Ethnicity Not Collected | US | Randomized, Parallel Assignment  | Industry           | 2012 |
| ActiV.A.C.+ Compression Therapy Versus Compression Therapy Alone for the Treatment of Chronic Venous Ulcerations                                                                                                           | Cardiovascular Disease | Device              | 2    |   | Race and Ethnicity Not Collected | US | Randomized, Parallel Assignment  | University         | 2012 |
| Actual Human Use of Methotrexate (MTX) Subcutaneously Administered Via the VIBEX MTX Auto-Injector Device                                                                                                                  | Arthritis              | Device              | 101  | 0 |                                  | US | Single Group Assignment          | Industry           | 2012 |
| Aggressive Fever Control With Intravenous Ibuprofen After Non-traumatic Brain Hemorrhage                                                                                                                                   | Cardiovascular Disease | Drug                | 35   | 0 |                                  | US | Randomized, Parallel Assignment  | University         | 2012 |
| Analgesia After Total Hip Arthroplasty: Peri-Articular Injection Versus Epidural Patient Controlled Analgesia (PCA)                                                                                                        | Arthritis              | Procedure           | 90   | 0 |                                  | US | Randomized, Parallel Assignment  | Hospital           | 2012 |
| Antidepressant Plus Asenapine Versus Antidepressant Plus Placebo for Depression                                                                                                                                            | Mental Illness         | Drug                | 46   |   | Race and Ethnicity Not Collected | US | Randomized, Parallel Assignment  | University         | 2012 |
| Anti-Inflammatory Treatment of Schizophrenia                                                                                                                                                                               | Mental Illness         | Drug                | 39   | 0 |                                  | US | Randomized, Parallel Assignment  | University         | 2012 |
| Assessing the PK and Effect on Glucose and GI Hormone Concentrations of Metformin Delayed-Release in Subjects With T2DM                                                                                                    | Diabetes               | Drug                | 24   | 0 |                                  | US | Randomized, Crossover Assignment | Industry           | 2012 |
| Asthma Data Innovation Demonstration Project                                                                                                                                                                               | Respiratory Disease    | Device              | 95   |   | Race and Ethnicity Not Collected | US | Single Group Assignment          | Research Institute | 2012 |
| Autologous Cord Blood Stem Cells for Autism                                                                                                                                                                                | Mental Illness         | Biological          | 30   | 0 |                                  | US | Randomized, Crossover Assignment | Research Institute | 2012 |
| Bi-Level Positive Airway Ventilation for Acute Chest Syndrome                                                                                                                                                              | Respiratory Disease    | Device              | 0    |   | Race and Ethnicity Not Collected | US | Randomized, Parallel Assignment  | University         | 2012 |
| Clinical Efficacy of a Toothpaste in Providing Relief From the Pain of Dental Hypersensitivity                                                                                                                             | Dental Disease         | Drug                | 113  |   |                                  | US | Randomized, Parallel Assignment  | Industry           | 2012 |
| Combined Behavioral and Analgesic Trial for Fibromyalgia                                                                                                                                                                   | Arthritis              | Drug and Behavioral | 134  | 2 | American Indian or Alaska Native | US | Randomized, Factorial Assignment | University         | 2012 |
| Compare Technegas Ventilation-Perfusion SPECT and Xenon Ventilation-Perfusion Planar Imaging for Pulmonary Embolism                                                                                                        | Respiratory Disease    | Drug                | 18   | 0 |                                  | US | Non-randomized,                  | Industry           | 2012 |

|                                                                                                                                                                       |                        |            |     |   |                                                                             |    |                                  |                    |      |
|-----------------------------------------------------------------------------------------------------------------------------------------------------------------------|------------------------|------------|-----|---|-----------------------------------------------------------------------------|----|----------------------------------|--------------------|------|
|                                                                                                                                                                       |                        |            |     |   |                                                                             |    | Crossover Assignment             |                    |      |
| Comparison of a New Formulation of Insulin Glargine With Lantus in Patients With Type 1 Diabetes Mellitus on Basal Plus Mealtime Insulin                              | Diabetes               | Drug       | 59  |   | Race and Ethnicity Not Collected                                            | US | Randomized, Parallel Assignment  | Industry           | 2012 |
| Conversations as a Means to Delay the Onset of Alzheimer's Disease                                                                                                    | Mental Illness         | Behavioral | 83  |   | Race and Ethnicity Not Collected                                            | US | Randomized, Parallel Assignment  | NIH                | 2012 |
| Developing New Clinical Management Strategies                                                                                                                         | Mental Illness         | Drug       | 3   |   | Race and Ethnicity Not Collected                                            | US | Randomized, Parallel Assignment  | Research Institute | 2012 |
| Donor Atorvastatin Treatment in Preventing Severe Acute GVHD After Nonmyeloablative Peripheral Blood Stem Cell Transplant in Patients With Hematological Malignancies | Cardiovascular Disease | Drug       | 47  | 2 | American Indian or Alaska Native, Native Hawaiian or Other Pacific Islander | US | Single Group Assignment          | NIH                | 2012 |
| Drug-Eluting Stents vs. Bare Metal Stents In Saphenous Vein Graft Angioplasty                                                                                         | Cardiovascular Disease | Device     | 597 | 0 |                                                                             | US | Randomized, Parallel Assignment  | Research Institute | 2012 |
| Early Feasibility Study 2 of Outpatient Control-to-Range - Testing System Efficacy                                                                                    | Diabetes               | Device     | 20  |   | Race and Ethnicity Not Collected                                            | US | Randomized, Crossover Assignment | University         | 2012 |
| Eclampsia and Posterior Reversible Encephalopathy Syndrome (PRES):                                                                                                    | Hypertension           | Drug       | 1   |   | Race and Ethnicity Not Collected                                            | US | Randomized, Parallel Assignment  | University         | 2012 |
| Effects of Eszopiclone on Sleep and Memory in Schizophrenia                                                                                                           | Mental Illness         | Drug       | 59  | 0 |                                                                             | US | Randomized, Crossover Assignment | Hospital           | 2012 |
| Effects of Inhaled Cannabis on Driving Performance                                                                                                                    | Mental Illness         | Drug       | 98  | 0 |                                                                             | US | Randomized, Crossover Assignment | NIH                | 2012 |
| Effects of Intranasal Oxytocin on Satiety Signaling in People With Schizophrenia                                                                                      | Mental Illness         | Drug       | 17  | 0 |                                                                             | US | Randomized, Crossover Assignment | University         | 2012 |
| Effects of Non Contact Low Frequency Ultrasound in Healing Venous Leg Ulcers                                                                                          | Cardiovascular Disease | Device     | 156 | 0 |                                                                             | US | Randomized, Parallel Assignment  | Industry           | 2012 |
| Efficacy and Safety of Azilsartan Medoxomil Used in Combination With Metformin in Participants With Hypertension and Diabetes                                         | Hypertension           | Drug       | 105 | 1 | Native Hawaiian or Other Pacific Islander                                   | US | Randomized, Parallel Assignment  | Industry           | 2012 |
| Efficacy and Safety of Liraglutide in Combination With Metformin Compared to Metformin Alone, in Children and Adolescents With Type 2 Diabetes                        | Diabetes               | Drug       | 135 | 3 | American Indian or Alaska Native                                            | US | Randomized, Parallel Assignment  | Industry           | 2012 |
| Efficacy and Safety of Trichuris Suis Ova (TSO) as Compared to Placebo                                                                                                | Cardiovascular Disease | Biological | 250 | 1 | American Indian or Alaska Native                                            | US | Randomized, Parallel Assignment  | Industry           | 2012 |

|                                                                                                                           |                        |            |     |    |                                                                             |    |                                  |                    |      |
|---------------------------------------------------------------------------------------------------------------------------|------------------------|------------|-----|----|-----------------------------------------------------------------------------|----|----------------------------------|--------------------|------|
| Efficacy of Inhaled Albuterol Spiromax <sup>®</sup> in Subjects With Persistent Asthma With Steady State Pharmacokinetics | Respiratory Disease    | Drug       | 160 | 2  | American Indian or Alaska Native, Pacific Islander                          | US | Randomized, Parallel Assignment  | Industry           | 2012 |
| Evaluation of a Prototype Diabetes Management System Applied to Insulin Initiation and Titration                          | Diabetes               | Device     | 40  |    | Race and Ethnicity Not Collected                                            | US | Randomized, Parallel Assignment  | Research Institute | 2012 |
| Evaluation of Blood Glucose Monitoring Systems With Blood Samples From Neonates                                           | Diabetes               | Device     | 162 |    | Race and Ethnicity Not Collected                                            | US | Single Group Assignment          | Industry           | 2012 |
| Exposure Therapy for Veterans With PTSD and Panic Attacks (Phase 1)                                                       | Mental Illness         | Behavioral | 7   |    | Race and Ethnicity Not Collected                                            | US | Single Group Assignment          | Research Institute | 2012 |
| FK506 (Tacrolimus) in Pulmonary Arterial Hypertension                                                                     | Respiratory Disease    | Drug       | 23  |    | Race and Ethnicity Not Collected                                            | US | Randomized, Parallel Assignment  | University         | 2012 |
| GLASSIA Infusion Rate Study                                                                                               | Respiratory Disease    | Biological | 30  |    | Race and Ethnicity Not Collected                                            | US | Randomized, Crossover Assignment | Industry           | 2012 |
| Group Treatment for PTSD: A Randomized Clinical Trial With Veterans                                                       | Mental Illness         | Behavioral | 198 | 3  | American Indian or Alaska Native                                            | US | Randomized, Parallel Assignment  | Research Institute | 2012 |
| HeartLight Ablation in Patients With Paroxysmal Atrial Fibrillation (PAF)                                                 | Cardiovascular Disease | Device     | 405 | 0  |                                                                             | US | Randomized, Parallel Assignment  | Industry           | 2012 |
| Investigation of Efficacy of incobotulinumtoxinA (Xeomin) in Relieving Symptoms of Restless Leg Syndrome.                 | Mental Illness         | Drug       | 24  |    | Race and Ethnicity Not Collected                                            | US | Randomized, Crossover Assignment | University         | 2012 |
| Investigation of Sacroiliac Fusion Treatment (INSITE)                                                                     | Arthritis              | Device     | 159 | 1  | American Indian                                                             | US | Randomized, Parallel Assignment  | Industry           | 2012 |
| Liraglutide in Obesity and Diabetes: Identification of CNS Targets Using fMRI                                             | Diabetes               | Drug       | 28  |    | Race and Ethnicity Not Collected                                            | US | Randomized, Crossover Assignment | Hospital           | 2012 |
| Low Dose Naltrexone-buprenorphine Transfer to Vivitrol Injection in Opioid Dependence                                     | Mental Illness         | Drug       | 38  | 0  |                                                                             | US | Single Group Assignment          | Industry           | 2012 |
| Magnesium Supplements In The Treatment Of Pseudoxanthoma Elasticum (PXE)                                                  | Cardiovascular Disease | Drug       | 44  |    | Race and Ethnicity Not Collected                                            | US | Randomized, Parallel Assignment  | Industry           | 2012 |
| Mantram Repetition Meditation for Veterans With PTSD                                                                      | Mental Illness         | Behavioral | 181 | 31 | American Indian or Alaska Native, Native Hawaiian or Other Pacific Islander | US | Randomized, Parallel Assignment  | Research Institute | 2012 |



|                                                                                                                                                                  |                        |           |     |   |                                  |    |                                      |            |      |
|------------------------------------------------------------------------------------------------------------------------------------------------------------------|------------------------|-----------|-----|---|----------------------------------|----|--------------------------------------|------------|------|
| Manuka Honey in Preventing Esophagitis-Related Pain in Patients Receiving Chemotherapy and Radiation Therapy For Lung Cancer                                     | Respiratory Disease    | Drug      | 163 | 2 | American Indian or Alaska Native | US | Randomized, Parallel Assignment      | NIH        | 2012 |
| Multiple Ascending Dose Study of the Safety, Tolerability, Pharmacokinetic/Efficacy                                                                              | Mental Illness         | Drug      | 45  | 0 |                                  | US | Non-randomized, Factorial Assignment | Industry   | 2012 |
| Nitrites, Exercise, and Peripheral Arterial Disease                                                                                                              | Cardiovascular Disease | Drug      | 32  | 0 |                                  | US | Randomized, Parallel Assignment      | NIH        | 2012 |
| Novel Use of (Oral) Ketotifen for the Treatment of Fibromyalgia: A Pilot Study                                                                                   | Arthritis              | Drug      | 51  |   | Race and Ethnicity Not Collected | US | Randomized, Parallel Assignment      | University | 2012 |
| Oral Nitrite in Adults With Metabolic Syndrome and Hypertension                                                                                                  | Hypertension           | Drug      | 20  | 2 | American Indian or Alaska Native | US | Single Group Assignment              | University | 2012 |
| Persistent Methicillin Resistant Staphylococcus Aureus Eradication Protocol (PMEP)                                                                               | Respiratory Disease    | Drug      | 29  | 0 |                                  | US | Randomized, Parallel Assignment      | University | 2012 |
| Pharmacodynamic Evaluation of PL2200 Versus Enteric-Coated Aspirin in Diabetic Patients                                                                          | Diabetes               | Drug      | 40  | 0 |                                  | US | Randomized, Crossover Assignment     | Industry   | 2012 |
| Phase 1 Study to Assess the Safety/Tolerability of Brexpiprazole as Adjunctive Therapy in Elderly Subjects With Major Depressive Disorder                        | Mental Illness         | Drug      | 18  |   | Race and Ethnicity Not Collected | US | Randomized, Parallel Assignment      | Industry   | 2012 |
| Point-of-Care Glucose Testing and Insulin Supplementation                                                                                                        | Diabetes               | Drug      | 235 | 0 |                                  | US | Randomized, Parallel Assignment      | University | 2012 |
| PT001 MDI Versus Spiriva <sup>®</sup> in Patients With Moderate to Severe COPD                                                                                   | Respiratory Disease    | Drug      | 140 | 0 |                                  | US | Randomized, Crossover Assignment     | Industry   | 2012 |
| Safety and Tolerability Trial of Aripiprazole IM Depot Treatment in Adult Subjects With Schizophrenia Stabilized on Oral Antipsychotics Other Than Aripiprazole  | Mental Illness         | Drug      | 60  | 0 |                                  | US | Single Group Assignment              | Industry   | 2012 |
| SCD Use to Prevent Deep Venous Thrombosis (DVT) in Patients With PICC Lines                                                                                      | Cardiovascular Disease | Device    | 78  |   | Race and Ethnicity Not Collected | US | Randomized, Parallel Assignment      | Hospital   | 2012 |
| SPD489 Low Dose and High Dose Ranges When Added to Stable Doses of Antipsychotic Medications in Clinically Stable Adults With Negative Symptoms of Schizophrenia | Mental Illness         | Drug      | 0   |   | Race and Ethnicity Not Collected | US | Randomized, Parallel Assignment      | Industry   | 2012 |
| Stereotactic Body Radiotherapy (SBRT) Versus Stereotactic Body Proton Therapy (SBPT)                                                                             | Respiratory Disease    | Radiation | 21  | 0 |                                  | US | Randomized, Parallel Assignment      | NIH        | 2012 |
| Study of Elotuzumab in Combination With Lenalidomide and Dexamethasone in Subjects With Multiple Myeloma and Various Levels of Renal Function                    | Cardiovascular Disease | Drug      | 35  | 0 |                                  | US | Non-randomized, Parallel Assignment  | Industry   | 2012 |

|                                                                                                                   |                        |        |     |   |                                                                             |    |                                     |            |      |
|-------------------------------------------------------------------------------------------------------------------|------------------------|--------|-----|---|-----------------------------------------------------------------------------|----|-------------------------------------|------------|------|
| STX-100 in Patients With Idiopathic Pulmonary Fibrosis (IPF)                                                      | Respiratory Disease    | Drug   | 41  | 0 |                                                                             | US | Randomized, Parallel Assignment     | Industry   | 2012 |
| Tadalafil and Nesiritide as Therapy in Pre-clinical Heart Failure                                                 | Cardiovascular Disease | Drug   | 43  |   | Race and Ethnicity Not Collected                                            | US | Randomized, Crossover Assignment    | NIH        | 2012 |
| Tandem Auto Transplantation in Myeloma Patients With <12 Months of Prior Treatment                                | Cardiovascular Disease | Drug   | 19  |   | Race and Ethnicity Not Collected                                            | US | Single Group Assignment             | NIH        | 2012 |
| Temozolomide With or Without Veliparib in Treating Patients With Relapsed or Refractory Small Cell Lung Cancer    | Respiratory Disease    | Other  | 97  | 0 |                                                                             | US | Randomized, Parallel Assignment     | NIH        | 2012 |
| Test-retest Reproducibility of [11C]PHNO PET Using the Constant Infusion Paradigm                                 | Mental Illness         | Drug   | 10  | 0 |                                                                             | US | Single Group Assignment             | NIH        | 2012 |
| Thalidomide, Lenalidomide, and Rituximab for Previously Treated Waldenstrom Macroglobulinemia                     | Cardiovascular Disease | Drug   | 4   |   | Race and Ethnicity Not Collected                                            | US | Single Group Assignment             | University | 2012 |
| The Effect of Immediate Implant Placement and Provisionalization in the Esthetic Zone                             | Dental Disease         | Device | 5   |   | Race and Ethnicity Not Collected                                            | US | Randomized, Parallel Assignment     | University | 2012 |
| The PARTNER II Trial: Placement of AoRTic TraNscathetER Valves II - PARTNER II - Nested Registry 3/Valve-in-Valve | Cardiovascular Disease | Device | 197 |   | Race and Ethnicity Not Collected                                            | US | Single Group Assignment             | Industry   | 2012 |
| The Penumbra Liberty Trial: Safety and Effectiveness in the Treatment of Wide-Neck Intracranial Aneurysms         | Cardiovascular Disease | Device | 112 | 1 | American Indian                                                             | US | Single Group Assignment             | Industry   | 2012 |
| The Relationship of Hemoglobin A1c and Diabetic Wound Healing                                                     | Diabetes               | Drug   | 2   |   | Race and Ethnicity Not Collected                                            | US | Randomized, Parallel Assignment     | Hospital   | 2012 |
| Tilt-Table Study of the Clinical Efficacy of Midodrine in Symptomatic Orthostatic Hypotension                     | Hypertension           | Drug   | 20  |   | Race and Ethnicity Not Collected                                            | US | Randomized, Crossover Assignment    | Industry   | 2012 |
| Tobacco Dependence Treatment Education for Dental Students                                                        | Mental Illness         | Other  | 94  |   | Race and Ethnicity Not Collected                                            | US | Non-randomized, Parallel Assignment | University | 2012 |
| Treatment of Post-Traumatic Brain Injury (Post-TBI) Fatigue With Light Therapy                                    | Mental Illness         | Device | 88  | 7 | Asian/Pacific Islander                                                      | US | Randomized, Parallel Assignment     | University | 2012 |
| Using mTOR Inhibitors in the Prevention of BK Nephropathy                                                         | Kidney Disease         | Drug   | 40  | 2 | American Indian or Alaska Native, Native Hawaiian or Other Pacific Islander | US | Randomized, Parallel Assignment     | University | 2012 |
| Value of Liquid Potassium Magnesium Citrate in Controlling Hypertension                                           | Hypertension           | Drug   | 30  |   | Race and Ethnicity Not Collected                                            | US | Randomized, Crossover Assignment    | University | 2012 |

|                                                                                                                                                                                                                                                                  |                        |            |      |     |                                                                             |    |                                 |                    |      |
|------------------------------------------------------------------------------------------------------------------------------------------------------------------------------------------------------------------------------------------------------------------|------------------------|------------|------|-----|-----------------------------------------------------------------------------|----|---------------------------------|--------------------|------|
| Velcade + Cyclophosphamide in Newly Diagnosed Multiple Myeloma                                                                                                                                                                                                   | Cardiovascular Disease | Drug       | 17   |     | Race and Ethnicity Not Collected                                            | US | Single Group Assignment         | Industry           | 2012 |
| VERIFY: A Study to Compare Combination Regimen With Vildagliptin & Metformin Versus Metformin in Treatment-naïve Patients With Type 2 Diabetes Mellitus                                                                                                          | Diabetes               | Drug       | 2001 | 210 | Native Americans                                                            | US | Randomized, Parallel Assignment | Industry           | 2012 |
| Veterans Service Organizations and My HealthVet (MHV)                                                                                                                                                                                                            | Cardiovascular Disease | Other      | 282  |     | Race and Ethnicity Not Collected                                            | US | Randomized, Parallel Assignment | Research Institute | 2012 |
| Vet-Harts Pilot Intervention for Veterans With Coronary Heart Disease                                                                                                                                                                                            | Cardiovascular Disease | Behavioral | 12   | 0   |                                                                             | US | Randomized, Parallel Assignment | Research Institute | 2012 |
| Washington Study of Hemofiltration After Out-of-Hospital Cardiac Arrest                                                                                                                                                                                          | Cardiovascular Disease | Other      | 2    |     | Race and Ethnicity Not Collected                                            | US | Randomized, Parallel Assignment | University         | 2012 |
| Weighted Versus Uniform Dose of Tranexamic Acid in Patients Undergoing Primary, Knee Arthroplasty                                                                                                                                                                | Arthritis              | Drug       | 65   |     | Race and Ethnicity Not Collected                                            | US | Randomized, Parallel Assignment | University         | 2012 |
| 12-Month Open-Label Long-term Safety Study of TNX-102 SL Tablets in Fibromyalgia Patients                                                                                                                                                                        | Arthritis              | Drug       | 158  |     | Race and Ethnicity Not Collected                                            | US | Single Group Assignment         | Industry           | 2013 |
| A 26-week Trial Comparing Efficacy and Safety of Insulin Degludec/Insulin Aspart BID and Insulin Degludec OD Plus Insulin Aspart in Subjects With Type 2 Diabetes Mellitus Treated With Basal Insulin in Need of Treatment Intensification With Mealtime Insulin | Diabetes               | Drug       | 274  |     | Race and Ethnicity Not Collected                                            | US | Randomized, Parallel Assignment | Industry           | 2013 |
| A Clinical Evaluation of Absorbable, Bioresorbable Vascular Scaffold (Absorbable BVS) System in Chinese Population ~ ABSORB CHINA Randomized Controlled Trial (RCT)                                                                                              | Cardiovascular Disease | Device     | 459  |     | Race and Ethnicity Not Collected                                            | US | Randomized, Parallel Assignment | Industry           | 2013 |
| A Clinical Trial to Evaluate Long-term Efficacy and Safety of Lozenges Containing Lactobacilli Reuteri (Prodentis) on Gingivitis                                                                                                                                 | Dental Disease         | Other      | 62   | 2   | American Indian or Alaska Native, Native Hawaiian or Other Pacific Islander | US | Randomized, Parallel Assignment | Industry           | 2013 |
| A Double Blind Clinical Trial of DCS for Food Anxiety                                                                                                                                                                                                            | Mental Illness         | Drug       | 36   |     | Race and Ethnicity Not Collected                                            | US | Randomized, Parallel Assignment | NIH                | 2013 |
| A Helping Hand Among Low-Income Patients                                                                                                                                                                                                                         | Diabetes               | Behavioral | 348  | 0   |                                                                             | US | Randomized, Parallel Assignment | University         | 2013 |
| A Pharmacokinetic Substudy of the TDE-PH-304 Protocol                                                                                                                                                                                                            | Hypertension           | Drug       | 13   | 0   |                                                                             | US | Single Group Assignment         | Industry           | 2013 |
| A Phase 3 Rollover Study of Lumacaftor in Combination With Ivacaftor in Subjects 12 Years and Older With Cystic Fibrosis                                                                                                                                         | Respiratory Disease    | Drug       | 1164 |     | Race and Ethnicity Not Collected                                            | US | Randomized, Parallel Assignment | Industry           | 2013 |

|                                                                                                                                                                                                                                   |                        |            |     |   |                                                                             |    |                                 |                    |      |
|-----------------------------------------------------------------------------------------------------------------------------------------------------------------------------------------------------------------------------------|------------------------|------------|-----|---|-----------------------------------------------------------------------------|----|---------------------------------|--------------------|------|
| A Study of Lumacaftor in Combination With Ivacaftor in Cystic Fibrosis Subjects Aged 12 Years and Older Who Are Homozygous for the F508del-CFTR Mutation                                                                          | Respiratory Disease    | Drug       | 559 |   | Race and Ethnicity Not Collected                                            | US | Randomized, Parallel Assignment | Industry           | 2013 |
| A Study of LY2940680 in Small Cell Lung Cancer                                                                                                                                                                                    | Respiratory Disease    | Drug       | 26  | 0 |                                                                             | US | Randomized, Parallel Assignment | Industry           | 2013 |
| A Study of the Impact of Methotrexate (MTX) Discontinuation on the Efficacy of Subcutaneous (SC) Tocilizumab (TCZ) With MTX                                                                                                       | Arthritis              | Drug       | 718 |   | Race and Ethnicity Not Collected                                            | US | Randomized, Parallel Assignment | Industry           | 2013 |
| A Study to Demonstrate the Benefit of a New Kind of Anti-cancer Treatment [Preferentially Expressed Antigen of MELanoma (PRAME) Immunotherapy] for Patients With Non-Small Cell Lung Cancer (NSCLC), After Removal of Their Tumor | Respiratory Disease    | Biological | 137 |   | Race and Ethnicity Not Collected                                            | US | Randomized, Parallel Assignment | Industry           | 2013 |
| A Study To Examine The Safety, Tolerability And Pharmacokinetics Of PF-02545920 In Psychiatrically Stable Subjects With Schizophrenia                                                                                             | Mental Illness         | Drug       | 37  |   | Race and Ethnicity Not Collected                                            | US | Randomized                      | Industry           | 2013 |
| A Trial To Assess Risk of Delirium in Older Adults Undergoing Hip Fracture Surgery With Spinal or General Anesthesia                                                                                                              | Mental Illness         | Other      | 12  |   | Race and Ethnicity Not Collected                                            | US | Randomized, Parallel Assignment | University         | 2013 |
| Acetaminophen Versus Ibuprofen in Children With Asthma                                                                                                                                                                            | Respiratory Disease    | Drug       | 300 | 8 | American Indian or Alaska Native, Native Hawaiian or Other Pacific Islander | US | Randomized, Parallel Assignment | NIH                | 2013 |
| Acute Effects of Inorganic Nitrite on Cardiovascular Hemodynamics in Heart Failure With Preserved Ejection Fraction                                                                                                               | Cardiovascular Disease | Drug       | 28  | 0 |                                                                             | US | Randomized, Parallel Assignment | Industry           | 2013 |
| Alveolar Microperforation for Inflammation-Enhanced Tooth Movement During Orthodontic Treatment                                                                                                                                   | Dental Disease         | Device     | 21  |   | Race and Ethnicity Not Collected                                            | US | Randomized, Parallel Assignment | University         | 2013 |
| An Outpatient Study Of The Efficacy, Safety, And Tolerability Of PF-02545920 In The Adjunctive Treatment Of Sub-Optimally Controlled Symptoms of Schizophrenia                                                                    | Mental Illness         | Drug       | 240 |   | Race and Ethnicity Not Collected                                            | US | Randomized, Parallel Assignment | Industry           | 2013 |
| AngelA® Catheter Early Feasibility Clinical Study                                                                                                                                                                                 | Respiratory Disease    | Device     | 5   |   | Race and Ethnicity Not Collected                                            | US | Single Group Assignment         | Industry           | 2013 |
| Antipsychotic Effects on Brain Function in Schizophrenia                                                                                                                                                                          | Mental Illness         | Drug       | 4   |   | Race and Ethnicity Not Collected                                            | US | Randomized, Parallel Assignment | University         | 2013 |
| Aripiprazole Once-monthly in Patients With Schizophrenia                                                                                                                                                                          | Mental Illness         | Drug       | 88  | 0 |                                                                             | US | Single Group Assignment         | Industry           | 2013 |
| Artificial Pancreas Control System in an Outpatient Setting                                                                                                                                                                       | Diabetes               | Device     | 20  |   | Race and Ethnicity Not Collected                                            | US | Single Group Assignment         | Research Institute | 2013 |

|                                                                                                                                       |                        |       |      |   |                                                                             |    |                                  |                    |      |
|---------------------------------------------------------------------------------------------------------------------------------------|------------------------|-------|------|---|-----------------------------------------------------------------------------|----|----------------------------------|--------------------|------|
| AVERT Shock: Arginine Vasopressin During the Early Resuscitation of Traumatic Shock                                                   | Diabetes               | Drug  | 101  | 0 |                                                                             | US | Randomized, Parallel Assignment  | University         | 2013 |
| BEtime Sublingual TNX-102 SL as Fibromyalgia Intervention Therapy (BESTFIT)                                                           | Arthritis              | Drug  | 205  |   | Race and Ethnicity Not Collected                                            | US | Randomized, Parallel Assignment  | Industry           | 2013 |
| Bimatoprost Ocular Insert Compared to Topical Timolol Solution in Patients With Glaucoma or Ocular Hypertension                       | Hypertension           | Drug  | 169  |   | Race and Ethnicity Not Collected                                            | US | Randomized, Parallel Assignment  | Industry           | 2013 |
| Brexipiprazole (OPC-34712) as an Adjunctive Treatment in Adults With Major Depressive Disorder and Anxiety Symptoms                   | Mental Illness         | Drug  | 37   | 0 |                                                                             | US | Single Group Assignment          | Industry           | 2013 |
| Brexipiprazole as Adjunctive Therapy With Major Depressive Disorder and an Inadequate Response to Previous Adjunctive Therapy         | Mental Illness         | Drug  | 61   | 1 | American Indian or Alaska Native, Native Hawaiian or Other Pacific Islander | US | Single Group Assignment          | Industry           | 2013 |
| Cabozantinib-s-malate or Sunitinib Malate in Treating Patients With Previously Untreated Locally Advanced or Metastatic Kidney Cancer | Kidney Disease         | Drug  | 157  | 2 | American Indian or Alaska Native, Native Hawaiian or Other Pacific Islander | US | Randomized, Parallel Assignment  | NIH                | 2013 |
| Cangrelor Ticagrelor Transition Study                                                                                                 | Cardiovascular Disease | Drug  | 12   |   | Race and Ethnicity Not Collected                                            | US | Randomized, Factorial Assignment | Industry           | 2013 |
| Carfilzomib in Refractory Renal Cell Carcinoma (RCC)                                                                                  | Kidney Disease         | Drug  | 10   | 0 |                                                                             | US | Single Group Assignment          | Industry           | 2013 |
| Clinical Study of Macitentan in Patients With Pulmonary Arterial Hypertension to Psychometrically Validate the PAH-SYMPACT Instrument | Hypertension           | Drug  | 284  | 3 | American Indian or Alaska Native, Native Hawaiian or Other Pacific Islander | US | Single Group Assignment          | Industry           | 2013 |
| Comparing Types of Implementation of a Shared Decision Making Intervention                                                            | Respiratory Disease    | Other | 6274 |   | Race and Ethnicity Not Collected                                            | US | Randomized, Parallel Assignment  | Research Institute | 2013 |
| Comparison of Curosurf and Infasurf in the Treatment of Preterm Infants With Respiratory Distress Syndrome                            | Respiratory Disease    | Drug  | 30   |   | Race and Ethnicity Not Collected                                            | US | Randomized, Parallel Assignment  | University         | 2013 |
| Control of Cognition (Naltrexone, Methylphenidate, and ADHD Study (NMAS))                                                             | Mental Illness         | Drug  | 23   | 0 |                                                                             | US | Randomized, Parallel Assignment  | University         | 2013 |

|                                                                                                                                 |                        |                    |     |   |                                                                             |    |                                  |                    |      |
|---------------------------------------------------------------------------------------------------------------------------------|------------------------|--------------------|-----|---|-----------------------------------------------------------------------------|----|----------------------------------|--------------------|------|
| Dane County Drug Court Study for Addicted Offenders                                                                             | Mental Illness         | Drug               | 24  |   | Race and Ethnicity Not Collected                                            | US | Randomized, Parallel Assignment  | University         | 2013 |
| Decision Support for Smoking Cessation in Young Adults With Severe Mental Illness                                               | Mental Illness         | Behavioral         | 58  | 0 |                                                                             | US | Randomized, Parallel Assignment  | NIH                | 2013 |
| Development of Walk Assist Device to Improve Community Ambulation                                                               | Cardiovascular Disease | Device             | 53  |   | Race and Ethnicity Not Collected                                            | US | Randomized, Parallel Assignment  | Industry           | 2013 |
| DISKUS vs. ELLIPTA Device Preference Study in Chronic Obstructive Pulmonary Disease (COPD)                                      | Respiratory Disease    | Device             | 287 | 0 |                                                                             | US | Randomized, Crossover Assignment | Industry           | 2013 |
| Dose-Response of Salmeterol in Children                                                                                         | Respiratory Disease    | Drug               | 10  |   | Race and Ethnicity Not Collected                                            | US | Randomized, Crossover Assignment | University         | 2013 |
| Early Warning System                                                                                                            | Cardiovascular Disease | Other              | 571 |   | Race and Ethnicity Not Collected                                            | US | Randomized, Parallel Assignment  | University         | 2013 |
| Effect of Antioxidant Vitamins on Coagulopathy and Nosocomial Pneumonia After Severe Trauma                                     | Respiratory Disease    | Dietary Supplement | 11  | 0 |                                                                             | US | Randomized, Parallel Assignment  | University         | 2013 |
| Effectiveness of DECIDE in Patient-Provider Communication, Therapeutic Alliance & Care Continuation                             | Mental Illness         | Behavioral         | 481 | 7 | American Indian or Alaska Native, Native Hawaiian or Other Pacific Islander | US | Randomized, Parallel Assignment  | Hospital           | 2013 |
| Effects of Cerebral Hypoperfusion and Its Reversal on Late-Life Depression                                                      | Mental Illness         | Drug               | 1   |   | Race and Ethnicity Not Collected                                            | US | Single Group Assignment          | University         | 2013 |
| Efficacy of Optison Echo Contrast to Detect Thrombus in Left Atrial Appendage                                                   | Cardiovascular Disease | Drug               | 100 | 2 | Native Hawaiian or Other Pacific Islander                                   | US | Single Group Assignment          | University         | 2013 |
| Environmental Intervention to Reduce Allergens in Urban Schools and Childhood Asthma                                            | Respiratory Disease    | Other              | 29  | 0 |                                                                             | US | Randomized, Parallel Assignment  | Hospital           | 2013 |
| Erlotinib Hydrochloride or Crizotinib and Chemoradiation Therapy in Treating Patients With Stage III Non-small Cell Lung Cancer | Respiratory Disease    | Radiation          | 59  | 0 |                                                                             | US | Randomized, Parallel Assignment  | NIH                | 2013 |
| Evaluating Two Types of Cognitive Training in Veterans With Schizophrenia                                                       | Mental Illness         | Behavioral         | 105 | 0 |                                                                             | US | Randomized, Parallel Assignment  | Research Institute | 2013 |
| EverFlex Post Approval Study                                                                                                    | Cardiovascular Disease | Device             | 108 | 0 |                                                                             | US | Single Group Assignment          | Industry           | 2013 |
| Fatty Liver Study in Patients With Type II Diabetes                                                                             | Diabetes               | Drug               | 2   |   | Race and Ethnicity Not Collected                                            | US | Randomized, Parallel Assignment  | University         | 2013 |

|                                                                                                                                    |                        |            |     |   |                                          |    |                                  |                    |      |
|------------------------------------------------------------------------------------------------------------------------------------|------------------------|------------|-----|---|------------------------------------------|----|----------------------------------|--------------------|------|
| Group Learning Achieves Decreased Incidents of Lower Urinary Symptoms                                                              | Kidney Disease         | Behavioral | 463 | 5 | Asian/ Pacific Islander, Native American | US | Randomized, Parallel Assignment  | NIH                | 2013 |
| High Ticagrelor Loading Dose in STEMI                                                                                              | Cardiovascular Disease | Drug       | 52  | 0 |                                          | US | Randomized, Parallel Assignment  | University         | 2013 |
| Improving Buprenorphine Detoxification Outcomes With Isradipine                                                                    | Mental Illness         | Drug       | 28  | 0 |                                          | US | Randomized, Parallel Assignment  | NIH                | 2013 |
| Improving Communication About Serious Illness                                                                                      | Cardiovascular Disease | Behavioral | 817 | 8 | Pacific Islander, Native American        | US | Randomized, Parallel Assignment  | University         | 2013 |
| Informing Policy to Implement Pediatric Family Engagement in Meaningful Use Stage 3                                                | Respiratory Disease    | Other      | 294 | 0 |                                          | US | Single Group Assignment          | Hospital           | 2013 |
| Ipilimumab and Local Radiation Therapy in Treating Patients With Recurrent Melanoma, Non-Hodgkin Lymphoma, Colon, or Rectal Cancer | Cardiovascular Disease | Biological | 3   | 0 |                                          | US | Single Group Assignment          | NIH                | 2013 |
| IVIg Efficacy Study to Treat Cutaneous Lupus Erythematosus                                                                         | Arthritis              | Drug       | 16  |   | Race and Ethnicity Not Collected         | US | Single Group Assignment          | University         | 2013 |
| Ketamine for Suicidality in Bipolar Depression                                                                                     | Mental Illness         | Drug       | 16  | 0 |                                          | US | Randomized, Parallel Assignment  | Research Institute | 2013 |
| Lipid Biomarkers for Diabetic Heart Disease                                                                                        | Diabetes               | Drug       | 70  | 0 |                                          | US | Randomized, Parallel Assignment  | NIH                | 2013 |
| Mechanisms of Sleep Disruption Hyperalgesia                                                                                        | Mental Illness         | Drug       | 100 | 0 |                                          | US | Randomized, Crossover Assignment | NIH                | 2013 |
| MI Varnish and MI Paste Plus in a Caries Prevention and Remineralization Study                                                     | Dental Disease         | Drug       | 40  |   | Race and Ethnicity Not Collected         | US | Randomized, Parallel Assignment  | University         | 2013 |
| Mitigation of Radiation Pneumonitis and Fibrosis                                                                                   | Respiratory Disease    | Drug       | 50  |   | Race and Ethnicity Not Collected         | US | Randomized, Parallel Assignment  | Research Institute | 2013 |
| Naltrexone for Antipsychotic-Induced Weight Gain                                                                                   | Mental Illness         | Drug       | 144 | 0 |                                          | US | Randomized, Parallel Assignment  | NIH                | 2013 |
| Nesiritide and Renal Function After the Total Artificial Heart                                                                     | Cardiovascular Disease | Drug       | 2   |   | Race and Ethnicity Not Collected         | US | Randomized, Parallel Assignment  | University         | 2013 |
| OFDI Capsule Imaging in Patients With Atrial Fibrillation Undergone Radio Frequency (RF) Ablation                                  | Cardiovascular Disease | Device     | 5   | 0 |                                          | US | Single Group Assignment          | NIH                | 2013 |
| Omega-3 Dietary Supplements in Schizophrenia                                                                                       | Mental Illness         | Drug       | 50  |   | Race and Ethnicity Not Collected         | US | Single Group Assignment          | NIH                | 2013 |

|                                                                                                                                                  |                        |            |     |   |  |                                  |    |                                     |            |      |
|--------------------------------------------------------------------------------------------------------------------------------------------------|------------------------|------------|-----|---|--|----------------------------------|----|-------------------------------------|------------|------|
| Open-label, Extension Study of Aripiprazole Intramuscular Depot (OPC-14597, Lu AF41155) in Patients With Schizophrenia                           | Mental Illness         | Drug       | 74  |   |  | Race and Ethnicity Not Collected | US | Single Group Assignment             | Industry   | 2013 |
| Outpatient Reduction of Nocturnal Hypoglycemia by Using Predictive Algorithms and Pump Suspension in Children                                    | Diabetes               | Device     | 82  | 0 |  |                                  | US | Randomized, Parallel Assignment     | NIH        | 2013 |
| PET-Adjusted Intensity Modulated Radiation Therapy and Combination Chemotherapy in Treating Patients With Stage II-IV Non-small Cell Lung Cancer | Respiratory Disease    | Drug       | 35  |   |  | Race and Ethnicity Not Collected | US | Single Group Assignment             | NIH        | 2013 |
| Pharmacodynamic Effect of Prasugrel vs. Ticagrelor in Diabetes                                                                                   | Diabetes               | Drug       | 50  | 0 |  |                                  | US | Randomized, Crossover Assignment    | University | 2013 |
| Pharmacokinetic Study of Oral IXAZOMIB in Cancer Patients With Liver Dysfunction                                                                 | Cardiovascular Disease | Drug       | 48  | 0 |  |                                  | US | Non-randomized, Parallel Assignment | Industry   | 2013 |
| Phase 1b/2 Study of Carfilzomib, Carboplatin, and Etoposide in Patients With Previously Untreated Extensive Stage Small-cell Lung Cancer         | Respiratory Disease    | Drug       | 32  | 0 |  |                                  | US | Sequential Assignment               | Industry   | 2013 |
| Pilot Study: Lipoic Acid and Omega-3 Fatty Acids for Alzheimer's Prevention                                                                      | Hypertension           | Drug       | 42  | 0 |  |                                  | US | Randomized, Parallel Assignment     | University | 2013 |
| Pilot Trial of Phototherapy for Acute Depression in Hospitalized Cystic Fibrosis Patients                                                        | Respiratory Disease    | Device     | 30  |   |  | Race and Ethnicity Not Collected | US | Single Group Assignment             | Hospital   | 2013 |
| Preventing Post-Operative Delirium in Patients Undergoing a Pneumonectomy, Esophagectomy or Thoracotomy                                          | Mental Illness         | Drug       | 135 | 0 |  |                                  | US | Randomized, Parallel Assignment     | University | 2013 |
| Real-Time Mobile Cognitive Behavioral Intervention for Serious Mental Illness                                                                    | Mental Illness         | Behavioral | 255 | 1 |  | American Indian or Alaska Native | US | Randomized, Parallel Assignment     | University | 2013 |
| Regadenoson Stress-MRI to Identify Coronary Artery Disease in Atrial Fibrillation Patients                                                       | Cardiovascular Disease | Drug       | 30  |   |  | Race and Ethnicity Not Collected | US | Single Group Assignment             | University | 2013 |
| Safety and Efficacy of Merlin (Ethanol and Glycolic Acid Mixture) for Episodic Treatment of Cold Sores                                           | Dental Disease         | Drug       | 469 | 2 |  | American Indian or Alaska Native | US | Randomized, Parallel Assignment     | Industry   | 2013 |
| Safety, Efficacy and Tolerability of Vilazodone in Generalized Anxiety Disorder                                                                  | Mental Illness         | Drug       | 414 | 2 |  | American Indian or Alaska Native | US | Randomized, Parallel Assignment     | Industry   | 2013 |
| Safety, Tolerability and Effectiveness of Nuedexta in the Treatment of Pseudobulbar Affect (PBA)                                                 | Cardiovascular Disease | Drug       | 367 | 2 |  | Native Hawaiian/pacific islander | US | Single Group Assignment             | Industry   | 2013 |
| Safety, Tolerability, Pharmacokinetic, and Efficacy Study of AZD5213 in Adolescents With Tourette's Disorder                                     | Mental Illness         | Drug       | 29  | 0 |  |                                  | US | Randomized, Crossover Assignment    | Industry   | 2013 |
| Series of N-of-1 Crossover Trials of Antihypertensive Therapy in Adolescents With Essential Hypertension                                         | Hypertension           | Drug       | 42  | 0 |  |                                  | US | Randomized, Crossover Assignment    | University | 2013 |



|                                                                                                                                         |                        |                    |     |   |                                  |    |                                  |            |      |
|-----------------------------------------------------------------------------------------------------------------------------------------|------------------------|--------------------|-----|---|----------------------------------|----|----------------------------------|------------|------|
| Shoe Lifts for Leg Length Inequality in Adults With Knee or Hip Symptoms                                                                | Arthritis              | Device             | 46  | 0 |                                  | US | Randomized, Parallel Assignment  | University | 2013 |
| Study of Adrenalectomy Versus Observation for Subclinical Hypercortisolism                                                              | Cardiovascular Disease | Procedure          | 4   | 0 |                                  | US | Randomized, Parallel Assignment  | NIH        | 2013 |
| Study of Flat Polyp Detection Using New Narrow Band Imaging (NBI) Compared to White Light Colonoscopy - The FIND FLAT Colonoscopy Study | Cardiovascular Disease | Device             | 281 |   |                                  | US | Randomized, Parallel Assignment  | Industry   | 2013 |
| Study of Oasis Ultra in Diabetic Foot Ulcers                                                                                            | Diabetes               | Other              | 82  | 0 |                                  | US | Randomized, Parallel Assignment  | Industry   | 2013 |
| Study to Characterize the Local Duration of Exposure From FX006 in Patients With Osteoarthritis of the Knee                             | Arthritis              | Drug               | 50  |   | Race and Ethnicity Not Collected | US | Single Group Assignment          | Industry   | 2013 |
| Targeting the Right Ventricle in Pulmonary Hypertension                                                                                 | Respiratory Disease    | Drug               | 22  |   | Race and Ethnicity Not Collected | US | Randomized, Parallel Assignment  | University | 2013 |
| Testing the Feasibility of Patient Controlled Sedation for Ventilated ICU Patients                                                      | Respiratory Disease    | Drug               | 15  | 0 |                                  | US | Randomized, Parallel Assignment  | NIH        | 2013 |
| The Effects of an Antioxidant Formulation on Ocular Blood Flow                                                                          | Hypertension           | Dietary Supplement | 47  | 0 |                                  | US | Randomized, Crossover Assignment | Industry   | 2013 |
| The Influence of Febuxostat on Coronary Artery Endothelial Dysfunction in Participants With Chronic Stable Angina                       | Cardiovascular Disease | Drug               | 30  | 0 |                                  | US | Randomized, Crossover Assignment | Industry   | 2013 |
| The Summer Camp Study: Blood Glucose Control With a Bi-Hormonal Bionic Endocrine Pancreas                                               | Diabetes               | Other              | 32  |   | Race and Ethnicity Not Collected | US | Randomized, Crossover Assignment | Hospital   | 2013 |
| The Use of Paravertebral Block for Cardiac Surgery                                                                                      | Cardiovascular Disease | Other              | 60  |   | Race and Ethnicity Not Collected | US | Single Group Assignment          | University | 2013 |
| Ticagrelor Versus Clopidogrel in Type 2 Diabetic Patients                                                                               | Diabetes               | Drug               | 20  |   | Race and Ethnicity Not Collected | US | Randomized, Crossover Assignment | University | 2013 |
| Tocilizumab in the Management of Juvenile Idiopathic Arthritis Associated Uveitis                                                       | Arthritis              | Drug               | 3   |   | Race and Ethnicity Not Collected | US | Single Group Assignment          | University | 2013 |
| TRACER RGD-K5 Carotid Plaque Imaging Study                                                                                              | Cardiovascular Disease | Drug               | 3   | 0 |                                  | US | Single Group Assignment          | Hospital   | 2013 |
| Tranexamic Acid in Reverse Total Shoulder Arthroplasty                                                                                  | Arthritis              | Drug               | 102 |   | Race and Ethnicity Not Collected | US | Randomized, Parallel Assignment  | Hospital   | 2013 |
| Treatment of Complex Regional Pain Syndrome With Once Daily Gastric-Retentive Gabapentin (Gralise)                                      | Mental Illness         | Drug               | 5   |   | Race and Ethnicity Not Collected | US | Single Group Assignment          | Hospital   | 2013 |

|                                                                                                                                                                                                                                                        |                        |            |     |   |                                  |    |                                     |                    |      |
|--------------------------------------------------------------------------------------------------------------------------------------------------------------------------------------------------------------------------------------------------------|------------------------|------------|-----|---|----------------------------------|----|-------------------------------------|--------------------|------|
| TXV13-01 Estradiol Vaginal Softgel Capsules in Treating Postmenopausal Women With Symptoms of Vulvar and Vaginal Atrophy                                                                                                                               | Mental Illness         | Drug       | 50  | 0 |                                  | US | Randomized, Parallel Assignment     | Industry           | 2013 |
| Use of Immune Globulin Plus Rituximab for Desensitization in Highly HLA Sensitized Patients Awaiting Deceased Donor Kidney Transplantation                                                                                                             | Kidney Disease         | Biological | 41  | 0 |                                  | US | Single Group Assignment             | Industry           | 2013 |
| Use of Mobile Devices and the Internet to Streamline an Asthma Clinical Trial                                                                                                                                                                          | Respiratory Disease    | Drug       | 79  | 2 | American Indian or Alaska Native | US | Randomized, Parallel Assignment     | NIH                | 2013 |
| Vascular Inflammation in Psoriasis - Extension Study                                                                                                                                                                                                   | Arthritis              | Drug       | 81  | 1 | American Indian or Alaska Native | US | Single Group Assignment             | University         | 2013 |
| 24 Week Efficacy and 3-year Safety and Efficacy of Secukinumab in Active Psoriatic Arthritis                                                                                                                                                           | Arthritis              | Biological | 414 | 2 | American Indian or Alaska Native | US | Randomized, Parallel Assignment     | Industry           | 2014 |
| 24 Week Efficacy and Safety Study of Empagliflozin (BI 10773) in Hypertensive Black/African American Patients With Type 2 Diabetes Mellitus and Hypertension                                                                                           | Diabetes               | Drug       | 150 | 0 |                                  | US | Randomized, Parallel Assignment     | Industry           | 2014 |
| A Clinical Study in Participants With Huntington's Disease (HD) to Assess Efficacy and Safety of Three Oral Doses of Laquinimod                                                                                                                        | Mental Illness         | Drug       | 352 | 0 |                                  | US | Randomized, Parallel Assignment     | Industry           | 2014 |
| A Concierge Model of CAE Plus LAI in Individuals With Schizophrenia at Risk for Treatment Non-adherence and Homelessness                                                                                                                               | Mental Illness         | Behavioral | 30  | 0 |                                  | US | Single Group Assignment             | University         | 2014 |
| A Dose Ranging Phase IIa Study of 6 Hour Intravenous Dosages of CXL-1427 in Patients Hospitalized With Heart Failure                                                                                                                                   | Cardiovascular Disease | Drug       | 70  |   | Race and Ethnicity Not Collected | US | Randomized, Parallel Assignment     | Industry           | 2014 |
| A Double-blind Study to Assess the Efficacy and Safety of Intranasal Esketamine for the Rapid Reduction of the Symptoms of Major Depressive Disorder, Including Suicidal Ideation, in Participants Who Are Assessed to be at Imminent Risk for Suicide | Mental Illness         | Drug       | 68  |   | Race and Ethnicity Not Collected | US | Randomized, Parallel Assignment     | Research Institute | 2014 |
| A Long-Term Extension Study of OnabotulinumtoxinA (BOTOX®) for Urinary Incontinence Due to Neurogenic Detrusor Overactivity                                                                                                                            | Mental Illness         | Biological | 95  | 0 |                                  | US | Non-Randomized, Parallel Assignment | Industry           | 2014 |
| A Mobile Personal Health Record for Behavioral Health Homes                                                                                                                                                                                            | Diabetes               | Behavioral | 311 | 0 |                                  | US | Randomized, Parallel Assignment     | NIH                | 2014 |
| A Multicenter, Postmarketing Study Evaluating the Concentration of Cimzia® in Mature Breast Milk of Lactating Mothers                                                                                                                                  | Arthritis              | Procedure  | 18  |   | Race and Ethnicity Not Collected | US | Single Group Assignment             | Industry           | 2014 |
| A Phase 2 Study of Viagenpumatulcel-L (HS-110) in Patients With Non-Small Cell Lung Cancer                                                                                                                                                             | Respiratory Disease    | Drug       | 66  | 0 |                                  | US | Randomized, Parallel Assignment     | Industry           | 2014 |
| A Phase 3a, Repeat Dose, Open-label, Long-term Safety Study of Mepolizumab in Asthmatic Subjects                                                                                                                                                       | Respiratory Disease    | Biological | 339 | 0 |                                  | US | Single Group Assignment             | Industry           | 2014 |

|                                                                                                                                                                                                                                                                                            |                        |            |       |     |                                                                             |    |                                         |            |      |
|--------------------------------------------------------------------------------------------------------------------------------------------------------------------------------------------------------------------------------------------------------------------------------------------|------------------------|------------|-------|-----|-----------------------------------------------------------------------------|----|-----------------------------------------|------------|------|
| A Phase II Study of Doxycycline in Relapsed NHL                                                                                                                                                                                                                                            | Cardiovascular Disease | Drug       | 7     |     | Race and Ethnicity Not Collected                                            | US | Single Group Assignment                 | University | 2014 |
| A Phase IIa Study to Investigate the Efficacy and Safety of AZD7624 in Chronic Obstructive Pulmonary Disease (COPD) Patients While on Maintenance Therapy                                                                                                                                  | Respiratory Disease    | Drug       | 213   | 7   | American Indian or Alaska Native                                            | US | Randomized, Parallel Assignment         | Industry   | 2014 |
| A Study Comparing Cardiovascular Effects of Ticagrelor Versus Placebo in Patients With Type 2 Diabetes Mellitus                                                                                                                                                                            | Diabetes               | Drug       | 19271 | 327 | American Indian or Alaska Native, Native Hawaiian or Other Pacific Islander | US | Randomized, Parallel Assignment         | Industry   | 2014 |
| A Study of IDN-6556 in Cirrhotic Subjects With Portal Hypertension                                                                                                                                                                                                                         | Cardiovascular Disease | Drug       | 23    |     | Race and Ethnicity Not Collected                                            | US | Non-randomized, Single Group Assignment | Industry   | 2014 |
| A Study of LY2409021 on Blood Pressure and Pulse Rate in Participants With Type 2 Diabetes Mellitus                                                                                                                                                                                        | Diabetes               | Drug       | 270   | 42  | American Indian or Alaska Native                                            | US | Randomized, Crossover Assignment        | Industry   | 2014 |
| A Study of Tabalumab (LY2127399) Using Two Different Injection Methods in Participants With Lupus                                                                                                                                                                                          | Arthritis              | Drug       | 226   | 0   |                                                                             | US | Randomized, Parallel Assignment         | Industry   | 2014 |
| A Study of the Gore VIABAHN BX for Treatment of Occlusive Disease in the Iliac Arteries.                                                                                                                                                                                                   | Cardiovascular Disease | Device     | 134   | 2   | American Indian or Alaska Native                                            | US | Single Group Assignment                 | Industry   | 2014 |
| A Study to Evaluate the Effect of Long-term Treatment With BELVIQ (Lorcaserin HCl) on the Incidence of Major Adverse Cardiovascular Events and Conversion to Type 2 Diabetes Mellitus in Obese and Overweight Subjects With Cardiovascular Disease or Multiple Cardiovascular Risk Factors | Diabetes               | Drug       | 14673 | 100 | American Indian or Alaska Native, Native Hawaiian or Other Pacific Islander | US | Randomized, Parallel Assignment         | Industry   | 2014 |
| Acceptance and Commitment Therapy for the Inpatient Treatment of Psychosis                                                                                                                                                                                                                 | Mental Illness         | Behavioral | 18    | 0   |                                                                             | US | Randomized, Parallel Assignment         | Industry   | 2014 |
| Achieving Cannabis Cessation-Evaluating N-Acetylcysteine Treatment                                                                                                                                                                                                                         | Mental Illness         | Drug       | 302   | 3   | American Indian or Alaska Native, Native Hawaiian or Other Pacific Islander | US | Randomized, Parallel Assignment         | NIH        | 2014 |
| Adjunctive Neurovascular Support for Wide-neck Aneurysm Embolization and Reconstruction                                                                                                                                                                                                    | Cardiovascular Disease | Device     | 34    |     | Race and Ethnicity Not Collected                                            | US | Single Group Assignment                 | Industry   | 2014 |

|                                                                                                                           |                        |            |      |    |                                                                             |    |                                  |                    |      |
|---------------------------------------------------------------------------------------------------------------------------|------------------------|------------|------|----|-----------------------------------------------------------------------------|----|----------------------------------|--------------------|------|
| An RCT Comparing Xenograft and Allograft for Ridge Preservation                                                           | Dental Disease         | Device     | 40   |    | Race and Ethnicity Not Collected                                            | US | Single Group Assignment          | Research Institute | 2014 |
| ARISTOCRAT-A Randomized Controlled Trial Evaluating Closure Following Access With the AXERA (Device Name) 2 Access System | Cardiovascular Disease | Device     | 39   |    | Race and Ethnicity Not Collected                                            | US | Randomized, Parallel Assignment  | Research Institute | 2014 |
| Artifact-Free High-Resolution Myocardial Perfusion MRI in Subjects With Abnormal Nuclear Myocardial Perfusion Studies     | Cardiovascular Disease | Drug       | 44   |    | Race and Ethnicity Not Collected                                            | US | Single Group Assignment          | Industry           | 2014 |
| Atomoxetine in Veterans With Comorbid ADHD/PTSD                                                                           | Mental Illness         | Drug       | 44   | 0  |                                                                             | US | Randomized, Crossover Assignment | Research Institute | 2014 |
| Best African American Response to Asthma Drugs                                                                            | Respiratory Disease    | Drug       | 574  | 0  |                                                                             | US | Randomized, Crossover Assignment | Hospital           | 2014 |
| Brief Behavioral Therapy in Improving Sleep Disorders in Patients With Stage I-III Breast Cancer Undergoing Chemotherapy  | Mental Illness         | Behavioral | 71   | 0  |                                                                             | US | Randomized, Parallel Assignment  | University         | 2014 |
| Care Coordination/Home Telehealth to Safeguard Care in CKD                                                                | Kidney Disease         | Other      | 118  | 0  |                                                                             | US | Randomized, Parallel Assignment  | NIH                | 2014 |
| Clinical Evaluation of BackStop in Patients Undergoing Ureteroscopic Lithotripsy                                          | Kidney Disease         | Device     | 35   | 0  |                                                                             | US | Randomized, Parallel Assignment  | University         | 2014 |
| Clinical Trial Tobacco Marijuana                                                                                          | Mental Illness         | Behavioral | 67   | 0  |                                                                             | US | Randomized, Parallel Assignment  | NIH                | 2014 |
| Closed Loop Insulin Pump Therapy After Islet Auto-Transplantation                                                         | Diabetes               | Device     | 14   |    | Race and Ethnicity Not Collected                                            | US | Randomized, Parallel Assignment  | University         | 2014 |
| Closed-Loop Glucagon Administration For Hypoglycemia Treatment                                                            | Diabetes               | Device     | 31   |    | Race and Ethnicity Not Collected                                            | US | Randomized, Crossover Assignment | University         | 2014 |
| Comparison of Treatment for Hoarding Disorder                                                                             | Mental Illness         | Behavioral | 323  | 4  | American Indian or Alaska Native, Native Hawaiian or Other Pacific Islander | US | Randomized, Parallel Assignment  | University         | 2014 |
| Decision Aids for the Management of Suspicious Occlusal Caries Lesions                                                    | Dental Disease         | Device     | 3085 | 79 | American Indian or Alaska Native, Native Hawaiian or Other Pacific Islander | US | Randomized, Parallel Assignment  | University         | 2014 |

|                                                                                                                                                                      |                        |            |      |   |                                  |    |                                     |                    |      |
|----------------------------------------------------------------------------------------------------------------------------------------------------------------------|------------------------|------------|------|---|----------------------------------|----|-------------------------------------|--------------------|------|
| Developing Effective Response Inhibition Training for Symptom Relief in OCD and Trichotillomania                                                                     | Mental Illness         | Behavioral | 45   | 0 |                                  | US | Randomized, Parallel Assignment     | NIH                | 2014 |
| Development & Testing of a Decision Aid for LVAD Placement                                                                                                           | Cardiovascular Disease | Other      | 98   | 0 |                                  | US | Randomized, Parallel Assignment     | University         | 2014 |
| Dexamethasone for Treatment of Radiation-related Fatigue in Patients Receiving RT for Head-neck and Lung Cancer                                                      | Respiratory Disease    | Drug       | 0    |   | Race and Ethnicity Not Collected | US | Randomized, Parallel Assignment     | University         | 2014 |
| Dexamethasone Versus Burr Hole Craniostomy for Symptomatic Chronic Subdural Hematoma                                                                                 | Cardiovascular Disease | Drug       | 10   |   | Race and Ethnicity Not Collected | US | Randomized, Parallel Assignment     | University         | 2014 |
| Dose Response Effects of Quillivant XR in Children With ADHD and Autism: A Pilot Study                                                                               | Mental Illness         | Drug       | 36   |   | Race and Ethnicity Not Collected | US | Randomized, Parallel Assignment     | Hospital           | 2014 |
| Effect of Combined Incretin-Based Therapy Plus Canagliflozin on Glycemic Control and the Compensatory Rise in Hepatic Glucose Production in Type 2 Diabetic Patients | Diabetes               | Drug       | 45   |   | Race and Ethnicity Not Collected | US | Single Group Assignment             | University         | 2014 |
| Efficacy and Safety Study of PT009, PT008, and PT005 in Subjects With Moderate to Severe Chronic Obstructive Pulmonary Disease (COPD)                                | Respiratory Disease    | Drug       | 180  |   | Race and Ethnicity Not Collected | US | Randomized, Crossover Assignment    | Industry           | 2014 |
| Efficacy Study of Riociguat and Its Effects on Exercise Performance and Pulmonary Artery Pressure at High Altitude                                                   | Hypertension           | Drug       | 22   |   | Race and Ethnicity Not Collected | US | Non-randomized, Parallel Assignment | University         | 2014 |
| Efficacy Study on Silver-coated ETT Cleaned With a Novel Device                                                                                                      | Respiratory Disease    | Device     | 40   | 0 |                                  | US | Randomized, Parallel Assignment     | Hospital           | 2014 |
| Efficacy, Safety And Tolerability Of PF-06743649 In Gout Subjects.                                                                                                   | Arthritis              | Drug       | 30   |   | Race and Ethnicity Not Collected | US | Randomized, Parallel Assignment     | Industry           | 2014 |
| Enhancing Delivery of Problem Solving Therapy Using SmartPhone Technology                                                                                            | Mental Illness         | Other      | 33   | 1 | Native Americans                 | US | Randomized, Parallel Assignment     | Research Institute | 2014 |
| Evaluation of Anti-platelet Factor 4/Heparin Antibodies in Hemodialysis Patients                                                                                     | Kidney Disease         | Device     | 42   | 0 |                                  | US | Randomized, Parallel Assignment     | Industry           | 2014 |
| Extended-Release vs. Oral Naltrexone Alcohol Treatment in Primary Care                                                                                               | Mental Illness         | Drug       | 237  | 1 | American Indian or Alaska Native | US | Randomized, Parallel Assignment     | University         | 2014 |
| Galantamine and Memantine Combination for Cognitive Impairments in Schizophrenia                                                                                     | Mental Illness         | Drug       | 3    | 0 |                                  | US | Single Group Assignment             | Industry           | 2014 |
| Gastrointestinal Sensorimotor Dysfunctions in Diabetes Mellitus                                                                                                      | Diabetes               | Drug       | 104  |   | Race and Ethnicity Not Collected | US | Randomized, Parallel Assignment     | NIH                | 2014 |
| Genomics Used to Improve DEpression Decisions                                                                                                                        | Mental Illness         | Genetic    | 1398 | 9 | American Indian or Alaska        | US | Randomized, Parallel Assignment     | University         | 2014 |

|                                                                                                      |                        |            |      |   |                                                                             |    |                                  |                    |      |
|------------------------------------------------------------------------------------------------------|------------------------|------------|------|---|-----------------------------------------------------------------------------|----|----------------------------------|--------------------|------|
|                                                                                                      |                        |            |      |   | Native, Native Hawaiian or Other Pacific Islander                           |    |                                  |                    |      |
| Heated Humidified Oxygen Compared to Dry Oxygen Therapy in Children With Bronchiolitis               | Respiratory Disease    | Device     | 32   | 0 |                                                                             | US | Randomized, Parallel Assignment  | Hospital           | 2014 |
| Human Mesenchymal Stromal Cells For Acute Respiratory Distress Syndrome (START)                      | Respiratory Disease    | Biological | 60   | 3 | Native Hawaiian or other Pacific Islander                                   | US | Randomized, Parallel Assignment  | NIH                | 2014 |
| Improving Cognition in Schizophrenia Using tDCS                                                      | Mental Illness         | Device     | 37   |   | Race and Ethnicity Not Collected                                            | US | Randomized, Crossover Assignment | University         | 2014 |
| Incentives, Cognitive Training and Internet Therapy for Teens With Poorly Controlled Type 1 Diabetes | Diabetes               | Behavioral | 61   | 0 |                                                                             | US | Randomized, Parallel Assignment  | NIH                | 2014 |
| Inpatient Diabetes on Corticosteroids                                                                | Diabetes               | Drug       | 85   |   | Race and Ethnicity Not Collected                                            | US | Randomized, Parallel Assignment  | Research Institute | 2014 |
| Jump Start Shared Medical Appointments for Diabetes With Weight Management                           | Diabetes               | Behavioral | 263  | 3 | American Indian or Alaska Native                                            | US | Randomized, Parallel Assignment  | Research Institute | 2014 |
| Latinos Combating Diabetes                                                                           | Diabetes               | Behavioral | 225  | 0 |                                                                             | US | Randomized, Parallel Assignment  | NIH                | 2014 |
| LCI-LUN-ABR-001: Carbo With Nab-Paclitaxel in Patients With Advanced NSCL Cancer                     | Respiratory Disease    | Drug       | 11   | 0 |                                                                             | US | Single Group Assignment          | Industry           | 2014 |
| Loving-Kindness Meditation for PTSD                                                                  | Mental Illness         | Behavioral | 184  | 3 | American Indian or Alaska Native                                            | US | Randomized, Parallel Assignment  | Research Institute | 2014 |
| Microvascular Assessment of Ranolazine in Non-Obstructive Atherosclerosis (MARINA)                   | Cardiovascular Disease | Drug       | 26   | 0 |                                                                             | US | Randomized, Parallel Assignment  | University         | 2014 |
| MOMENTUM 3 IDE Clinical Study Protocol                                                               | Cardiovascular Disease | Device     | 1028 | 4 | Native Hawaiian or other Pacific Islander                                   | US | Randomized, Parallel Assignment  | Industry           | 2014 |
| Musculoskeletal Ultrasound in Predicting Early Dose Titration With Tocilizumab                       | Arthritis              | Drug       | 74   | 2 | American Indian or Alaska Native, Native Hawaiian or Other Pacific Islander | US | Single Group Assignment          | University         | 2014 |
| Nutrition and Aerobic Exercise in Chronic Stroke                                                     | Cardiovascular Disease | Behavioral | 51   | 0 |                                                                             | US | Randomized, Parallel Assignment  | Research Institute | 2014 |

|                                                                                                                                                                            |                        |                    |      |   |                                                      |    |                                     |            |      |
|----------------------------------------------------------------------------------------------------------------------------------------------------------------------------|------------------------|--------------------|------|---|------------------------------------------------------|----|-------------------------------------|------------|------|
| Omega-3 for Depression and Other Cardiac Risk Factors - 2                                                                                                                  | Mental Illness         | Drug               | 144  | 2 | American Indian or Alaska Native                     | US | Randomized, Parallel Assignment     | NIH        | 2014 |
| Omega-3 Supplementation to ADHD Medication in Children                                                                                                                     | Mental Illness         | Dietary Supplement | 21   |   | Race and Ethnicity Not Collected                     | US | Single Group Assignment             | Hospital   | 2014 |
| Open-Label Study of N-Acetylcysteine in Children and Adolescents 5-17 With Bipolar Spectrum Disorders                                                                      | Mental Illness         | Drug               | 40   | 1 | American Indian or Alaska Native                     | US | Single Group Assignment             | Hospital   | 2014 |
| Open-label Study to Assess Usability of the Medical Information Device #1 (MIND1) System in Adults With Schizophrenia On Oral Aripiprazole                                 | Mental Illness         | Device             | 67   | 0 |                                                      | US | Single Group Assignment             | Industry   | 2014 |
| Person-Centered Versus Measurement-Based Care in Mental Health                                                                                                             | Mental Illness         | Behavioral         | 2443 | 9 | Native American                                      | US | Randomized, Parallel Assignment     | University | 2014 |
| Phase 2 Study of Alisertib (MLN8237) in Combination With Paclitaxel Versus Placebo in Combination With Paclitaxel as Second Line Therapy for Small Cell Lung Cancer (SCLC) | Respiratory Disease    | Drug               | 178  | 0 |                                                      | US | Randomized, Parallel Assignment     | Industry   | 2014 |
| Phase I Study of Nicotinamide for Early Onset Preeclampsia                                                                                                                 | Hypertension           | Drug               | 10   |   | Race and Ethnicity Not Collected                     | US | Single Group Assignment             | University | 2014 |
| Phase I Trial of Everolimus, Pomalidomide and Dexamethasone in Patients With Relapsed/Refractory Multiple Myeloma                                                          | Cardiovascular Disease | Drug               | 1    |   | Race and Ethnicity Not Collected                     | US | Single Group Assignment             | Industry   | 2014 |
| Phase I/II Trial of the Combination of Lenalidomide (Revlimid) and Nab-paclitaxel (Abraxane) in the Treatment of Relapsed/Refractory Multiple Myeloma                      | Cardiovascular Disease | Drug               | 3    |   | Race and Ethnicity Not Collected                     | US | Single Group Assignment             | University | 2014 |
| Pilot Study of Atorvastatin for Orthopedic Surgery Patients                                                                                                                | Cardiovascular Disease | Drug               | 20   | 0 |                                                      | US | Randomized, Parallel Assignment     | University | 2014 |
| Positron Emission Tomography (PET) Study Investigating Dopamine and Serotonin Receptor Occupancy After Multiple Oral Dosing of Lu AF35700                                  | Mental Illness         | Drug               | 22   |   | Race and Ethnicity Not Collected                     | US | Non-randomized, Parallel Assignment | Industry   | 2014 |
| Randomized Evaluation of Ten Allergy Skin Prick Test Devices                                                                                                               | Respiratory Disease    | Device             | 24   |   | Race and Ethnicity Not Collected                     | US | Single Group Assignment             | University | 2014 |
| Randomized Trial Comparing Sitagliptin to Placebo in Closed Loop                                                                                                           | Diabetes               | Drug               | 17   | 0 |                                                      | US | Single Group Assignment             | University | 2014 |
| Safety of Brimonidine Tartrate Ophthalmic Solution in a Population of Pediatric, Adult, and Geriatric Participants                                                         | Cardiovascular Disease | Drug               | 507  |   | Race and Ethnicity Not Collected                     | US | Randomized, Parallel Assignment     | Industry   | 2014 |
| Social Forces to Improve Statin Adherence (Study A)                                                                                                                        | Hypertension           | Behavioral         | 200  | 2 | American Indian or Alaska Native, Native Hawaiian or | US | Randomized, Parallel Assignment     | University | 2014 |

|                                                                                                                                                                                                                                               |                        |            |      |   |                                  |    |                                      |                    |      |
|-----------------------------------------------------------------------------------------------------------------------------------------------------------------------------------------------------------------------------------------------|------------------------|------------|------|---|----------------------------------|----|--------------------------------------|--------------------|------|
|                                                                                                                                                                                                                                               |                        |            |      |   | Other Pacific Islander           |    |                                      |                    |      |
| Specialized Community Disease Management to Reduce Substance Use and Hospital Readmissions                                                                                                                                                    | Cardiovascular Disease | Behavioral | 97   | 0 |                                  | US | Randomized, Parallel Assignment      | Research Institute | 2014 |
| Study of Clonidine Hydrochloride Topical Gel, 0.1% in the Treatment of Pain Associated With Diabetic Neuropathy                                                                                                                               | Diabetes               | Drug       | 260  | 3 | American Indian or Alaska Native | US | Randomized, Parallel Assignment      | Industry           | 2014 |
| Study to Evaluate the Safety and Efficacy of GSK1278863 in Recombinant Human Erythropoietin (rhEPO) Hyporesponsive Hemodialysis-dependent Chronic Kidney Disease Subjects With Anemia                                                         | Kidney Disease         | Drug       | 15   | 0 |                                  | US | Single Group Assignment              | Industry           | 2014 |
| SYN120 Study to Evaluate Its Safety, Tolerability and Efficacy in Parkinson's Disease Dementia (SYNAPSE)                                                                                                                                      | Mental Illness         | Drug       | 82   | 0 |                                  | US | Randomized, Parallel Assignment      | Industry           | 2014 |
| The Combination of Adductor Canal Block and Periarticular Injection. A Novel Technique for Patients Undergoing Total Knee Replacement (ACB PAI)                                                                                               | Arthritis              | Drug       | 111  | 1 | American Indian or Alaska Native | US | Randomized, Parallel Assignment      | Hospital           | 2014 |
| The Tobacco, Alcohol, Prescription Medication and Other Substances Tool                                                                                                                                                                       | Mental Illness         | Other      | 2000 | 0 |                                  | US | Single Group Assignment              | Research Institute | 2014 |
| The WEB-IT Clinical Study                                                                                                                                                                                                                     | Cardiovascular Disease | Device     | 150  | 0 |                                  | US | Single Group Assignment              | Industry           | 2014 |
| To Evaluate the Effect of Inhaled Medication Together With Exercise and Activity Training on Exercise Capacity and Daily Activities in Patients With Chronic Lung Disease With Obstruction of Airways                                         | Respiratory Disease    | Drug       | 303  |   | Race and Ethnicity Not Collected | US | Randomized, Parallel Assignment      | Industry           | 2014 |
| To Evaluate the Effect of Liraglutide on Ambulatory Blood Pressure-A Pilot Study                                                                                                                                                              | Cardiovascular Disease | Drug       | 11   | 0 |                                  | US | Randomized, Parallel Assignment      | University         | 2014 |
| Transcranial Magnetic Stimulation Treatment of Hoarding Disorder                                                                                                                                                                              | Mental Illness         | Device     | 1    |   | Race and Ethnicity Not Collected | US | Single Group Assignment              | Hospital           | 2014 |
| Treatment of Resistant Hypertension by Prevention of T-Cell Co-Stimulation                                                                                                                                                                    | Hypertension           | Drug       | 1    |   | Race and Ethnicity Not Collected | US | Randomized, Parallel Assignment      | University         | 2014 |
| 16-week Comparative Effectiveness Trial of Lamotrigine vs. Fluoxetine for Bipolar Depression                                                                                                                                                  | Mental Illness         | Drug       | 2    | 0 |                                  | US | Randomized, Parallel Assignment      | Hospital           | 2015 |
| 5-hydroxytryptophan and Creatine for Treatment Resistant Depression Associated With Hypoxia in Females                                                                                                                                        | Mental Illness         | Drug       | 15   | 0 |                                  | US | Single Group Assignment              | University         | 2015 |
| A Euglycemic Insulin Clamp Study in Type 1 Diabetic Patients With Oral Insulin (ORAMED)                                                                                                                                                       | Diabetes               | Drug       | 11   | 0 |                                  | US | Non-Randomized, Crossover Assignment | University         | 2015 |
| A Phase 4 Trial Assessing the ImPact of Residual Inflammation Detected Via Imaging TEchniques, Drug Levels and Patient Characteristics on the Outcome of Dose TaperIng of Adalimumab in Clinical Remission Rheumatoid Arthritis (RA) Subjects | Arthritis              | Biological | 149  | 0 |                                  | US | Randomized, Parallel Assignment      | Industry           | 2015 |



|                                                                                                                           |                        |            |       |    |                                           |    |                                       |            |      |
|---------------------------------------------------------------------------------------------------------------------------|------------------------|------------|-------|----|-------------------------------------------|----|---------------------------------------|------------|------|
| A Phase II Study to Evaluate Safety and Efficacy of ALX-0061 in Subjects With Systemic Lupus Erythematosus                | Arthritis              | Biological | 312   | 0  |                                           | US | Randomized, Parallel Assignment       | Industry   | 2015 |
| A Phase IIb Study for ALX-0061 Monotherapy in Subjects With Rheumatoid Arthritis                                          | Arthritis              | Biological | 251   |    | Race and Ethnicity Not Collected          | US | Randomized, Parallel Assignment       | Industry   | 2015 |
| A Pivotal Efficacy Trial to Evaluate HLD200 in Children With ADHD in a Classroom Setting                                  | Mental Illness         | Drug       | 125   | 2  | Native Hawaiian or Other Pacific Islander | US | Randomized, Parallel Assignment       | Industry   | 2015 |
| A Proof of Concept Study of Intravenous Sodium Nitroprusside in Adults With Symptomatic Schizophrenia                     | Mental Illness         | Drug       | 60    | 0  |                                           | US | Randomized, Crossover Assignment      | Hospital   | 2015 |
| A Study of MHAA4549A in Combination With Oseltamivir Versus Oseltamivir in Participants With Severe Influenza A Infection | Respiratory Disease    | Drug       | 168   | 2  | American Indian or Alaska Native          | US | Randomized, Parallel Assignment       | Industry   | 2015 |
| Accuracy of Self-estimation of Blood Alcohol Concentration Compared to Object Values                                      | Mental Illness         | Behavioral | 55    |    | Race and Ethnicity Not Collected          | US | Single Group Assignment               | Hospital   | 2015 |
| Adjunctive Brief Behavioral Treatment of Insomnia (BBTI) for Sleep Intervention (SI)                                      | Mental Illness         | Behavioral | 54    | 1  | American Indian or Alaska Native          | US | Randomized, Parallel Assignment       | Industry   | 2015 |
| An Open-label Extension Study to Evaluate the Safety of the 13 mg Bimatoprost Ocular Insert                               | Hypertension           | Drug       | 81    |    | Race and Ethnicity Not Collected          | US | Single Group Assignment               | Industry   | 2015 |
| Assessing Knowledge of Dietary Sodium Content and Implementation of Color-Coded Cue Cards and Dietary Sodium              | Cardiovascular Disease | Behavioral | 10    | 0  |                                           | US | Single Group Assignment               | University | 2015 |
| Cancer Associated Thrombosis and Isoquercetin (CATIQ)                                                                     | Cardiovascular Disease | Drug       | 64    | 0  |                                           | US | Non-randomized, Sequential Assignment | Hospital   | 2015 |
| Cardiognometry for Detecting Coronary Artery Disease by CT Angiography                                                    | Cardiovascular Disease | Device     | 2     | 0  |                                           | US | Single Group Assignment               | University | 2015 |
| Connection to Care: Pilot Study of a Mobile Health Tool for Patients With Depression and Anxiety                          | Mental Illness         | Behavioral | 18    | 0  |                                           | US | Single Group Assignment               | University | 2015 |
| Coordinated Healthcare Interventions for Childhood Asthma Gaps in Outcomes                                                | Respiratory Disease    | Behavioral | 373   | 2  | American Indian or Alaska Native          | US | Randomized, Parallel Assignment       | University | 2015 |
| Corticosteroid/Ropivacaine Versus Corticosteroid/Saline Injections for Knee Osteoarthritis                                | Arthritis              | Drug       | 29    |    | Race and Ethnicity Not Collected          | US | Randomized, Parallel Assignment       | Hospital   | 2015 |
| Cranial Electrotherapy Stimulation (CES) Therapy                                                                          | Mental Illness         | Device     | 6     |    | Race and Ethnicity Not Collected          | US | Single Group Assignment               | University | 2015 |
| Education Bundle to Decrease Patient Refusal of VTE Prophylaxis                                                           | Cardiovascular Disease | Behavioral | 19652 | 21 | Native American                           | US | Non-randomized, Parallel Assignment   | University | 2015 |

|                                                                                                                                                                                                                       |                        |            |     |    |                                           |    |                                  |                    |      |
|-----------------------------------------------------------------------------------------------------------------------------------------------------------------------------------------------------------------------|------------------------|------------|-----|----|-------------------------------------------|----|----------------------------------|--------------------|------|
| Effect of Harvoni on Proteinuria and eGFR in Hepatitis C Virus Associated Chronic Kidney Disease (CKD)                                                                                                                | Kidney Disease         | Drug       | 14  | 0  |                                           | US | Single Group Assignment          | Hospital           | 2015 |
| Effect of LIK066 on Body Weight in Patients With Elevated Body Mass Index                                                                                                                                             | Diabetes               | Drug       | 181 |    | Race and Ethnicity Not Collected          | US | Randomized, Parallel Assignment  | Industry           | 2015 |
| Effect of Methylnaltrexone on the PK/PD Profiles of Ticagrelor in Patients Treated With Morphine                                                                                                                      | Cardiovascular Disease | Drug       | 30  | 0  |                                           | US | Randomized, Crossover Assignment | University         | 2015 |
| Efficacy and Safety of Sotagliflozin in Young Adult Patients With Type 1 Diabetes Mellitus and Elevated Hemoglobin A1C                                                                                                | Diabetes               | Drug       | 87  | 0  |                                           | US | Randomized, Parallel Assignment  | Industry           | 2015 |
| Efficacy of Quetiapine for Pediatric Delirium                                                                                                                                                                         | Mental Illness         | Drug       | 6   | 0  |                                           | US | Randomized, Parallel Assignment  | University         | 2015 |
| Efficacy of Two Experimental Oral Rinses in Providing Long Term Relief From Dentinal Hypersensitivity                                                                                                                 | Dental Disease         | Device     | 240 |    | Race and Ethnicity Not Collected          | US | Randomized, Parallel Assignment  | Industry           | 2015 |
| Evaluation of an Ascensia Lancing System                                                                                                                                                                              | Diabetes               | Device     | 119 | 3  | American Indian or Alaska Native          | US | Single Group Assignment          | Industry           | 2015 |
| Evaluation of Safety and Efficacy of Lumason in Pediatric Echocardiography                                                                                                                                            | Cardiovascular Disease | Drug       | 13  | 0  |                                           | US | Single Group Assignment          | Industry           | 2015 |
| Improving Mood in Veterans in Primary Care                                                                                                                                                                            | Mental Illness         | Behavioral | 140 | 4  | Native Hawaiian or other Pacific Islander | US | Randomized, Parallel Assignment  | Research Institute | 2015 |
| Improving Patient-Centered Care Delivery Among Patients With Chronic Obstructive Pulmonary Disease                                                                                                                    | Respiratory Disease    | Other      | 240 | 4  | American Indian or Alaska Native          | US | Randomized, Parallel Assignment  | University         | 2015 |
| Injectable Pharmacotherapy for Opioid Use Disorders (IPOD)                                                                                                                                                            | Mental Illness         | Drug       | 151 | 13 | American Indian or Alaska Native          | US | Randomized, Parallel Assignment  | University         | 2015 |
| Integrated Tele-monitoring and Patient-centric Health Coaching Strategy in Patients Hospitalized With Heart Failure                                                                                                   | Cardiovascular Disease | Device     | 112 | 0  |                                           | US | Randomized, Parallel Assignment  | Hospital           | 2015 |
| Intranasal Glulisine in Amnesic Mild Cognitive Impairment and Probable Mild Alzheimer's Disease                                                                                                                       | Mental Illness         | Drug       | 49  | 0  |                                           | US | Randomized, Parallel Assignment  | Research Institute | 2015 |
| Lidocaine for Diabetic Peripheral Neuropathy                                                                                                                                                                          | Diabetes               | Drug       | 34  | 0  |                                           | US | Randomized, Crossover Assignment | University         | 2015 |
| Long-Term Extension Study of KRN23 in Adult Subjects With X-Linked Hypophosphatemia (XLH)                                                                                                                             | Kidney Disease         | Biological | 20  | 0  |                                           | US | Single Group Assignment          | Industry           | 2015 |
| Lorvotuzumab Mertansine in Treating Younger Patients With Relapsed or Refractory Wilms Tumor, Rhabdomyosarcoma, Neuroblastoma, Pleuropulmonary Blastoma, Malignant Peripheral Nerve Sheath Tumor, or Synovial Sarcoma | Kidney Disease         | Other      | 62  | 0  |                                           | US | Single Group Assignment          | NIH                | 2015 |

|                                                                                                                     |                        |            |     |   |                                                                             |    |                                     |                    |      |
|---------------------------------------------------------------------------------------------------------------------|------------------------|------------|-----|---|-----------------------------------------------------------------------------|----|-------------------------------------|--------------------|------|
| Medtronic Resolute Onyx 2.0 mm Clinical Study                                                                       | Cardiovascular Disease | Device     | 101 | 1 | American Indian or Alaska Native                                            | US | Single Group Assignment             | Industry           | 2015 |
| Minocycline Augmentation to Clozapine                                                                               | Mental Illness         | Drug       | 10  |   | Race and Ethnicity Not Collected                                            | US | Non-randomized, Parallel Assignment | University         | 2015 |
| Mirabegron in Parkinson Disease and Impaired Cognition                                                              | Mental Illness         | Drug       | 7   |   | Race and Ethnicity Not Collected                                            | US | Randomized, Parallel Assignment     | Research Institute | 2015 |
| Multiple Ascending Doses of PF-04958242 in Subjects With Stable Schizophrenia                                       | Mental Illness         | Drug       | 39  |   | Race and Ethnicity Not Collected                                            | US | Randomized, Parallel Assignment     | Industry           | 2015 |
| Non-invasive Measurement of Cerebral Dynamic Autoregulation                                                         | Cardiovascular Disease | Device     | 21  |   | Race and Ethnicity Not Collected                                            | US | Single Group Assignment             | University         | 2015 |
| OSA Screen Negative With Spinal Duramorph                                                                           | Mental Illness         | Device     | 3   | 0 |                                                                             | US | Single Group Assignment             | University         | 2015 |
| PACT for Individuals With Serious Mental Illness                                                                    | Mental Illness         | Other      | 331 | 5 | American Indian or Alaska Native, Native Hawaiian or Other Pacific Islander | US | Randomized, Parallel Assignment     | Research Institute | 2015 |
| PD and Safety of TG-0054 Combined With G-CSF in Multiple Myeloma, Non-Hodgkin Lymphoma and Hodgkin Disease Patients | Cardiovascular Disease | Drug       | 12  | 1 | Native Hawaiian or Other Pacific Islander                                   | US | Single Group Assignment             | Industry           | 2015 |
| Pharmacokinetic Comparison Of All FK-506 Formulations                                                               | Kidney Disease         | Drug       | 31  | 0 |                                                                             | US | Randomized, Crossover Assignment    | Industry           | 2015 |
| Pharmacokinetics of Amlodipine Besylate at Delivery and During Lactation                                            | Hypertension           | Drug       | 16  | 0 |                                                                             | US | Single Group Assignment             | University         | 2015 |
| Pharmacokinetics, Pharmacodynamics, and Impact of Inorganic Nitrate on Exercise in HFpEF                            | Cardiovascular Disease | Drug       | 12  | 1 | Pacific Islander                                                            | US | Randomized, Parallel Assignment     | University         | 2015 |
| Phase 2a RDEA3170 and Allopurinol Combination Study in Gout Subjects                                                | Arthritis              | Biological | 41  | 0 |                                                                             | US | Randomized, Parallel Assignment     | Industry           | 2015 |
| Phenytoin for Memory Impairment Secondary to Megestrol                                                              | Mental Illness         | Drug       | 21  | 0 |                                                                             | US | Randomized, Crossover Assignment    | University         | 2015 |
| Photodynamic Therapy (PDT) With Levulan and Blue Light for the Treatment of Actinic Cheilitis                       | Dental Disease         | Drug       | 24  | 0 |                                                                             | US | Single Group Assignment             | Industry           | 2015 |
| PowerUp for Health: A Diabetes Prevention Program for Men                                                           | Diabetes               | Behavioral | 29  |   | Race and Ethnicity Not Collected                                            | US | Single Group Assignment             | NIH                | 2015 |

|                                                                                                                       |                        |            |     |   |                                           |    |                                   |            |      |
|-----------------------------------------------------------------------------------------------------------------------|------------------------|------------|-----|---|-------------------------------------------|----|-----------------------------------|------------|------|
| Renal Denervation Using the Vessix Renal Denervation System for the Treatment of Hypertension (REDUCE HTN:REINFORCE)  | Hypertension           | Device     | 51  | 0 |                                           | US | Randomized, Parallel Assignment   | Industry   | 2015 |
| Role of Magnesium Supplementation in the Treatment of Depression                                                      | Mental Illness         | Drug       | 126 | 0 |                                           | US | Randomized, Crossover Assignment  | University | 2015 |
| rtPA in the Prevention of CVAD-Associated Thrombosis and Infection in Pediatric Patients With Short Bowel Syndrome    | Cardiovascular Disease | Drug       | 8   | 0 |                                           | US | Single Group Assignment           | University | 2015 |
| Safety and Efficacy Study of NBI-98854 in Adults With Tourette Syndrome                                               | Mental Illness         | Drug       | 124 | 0 |                                           | US | Randomized, Parallel Assignment   | Industry   | 2015 |
| SGLT2 Inhibition and Stimulation of Endogenous Glucose Production: Protocol 2                                         | Diabetes               | Drug       | 30  | 0 |                                           | US | Randomized, Parallel Assignment   | NIH        | 2015 |
| SMART-SF Radiofrequency Ablation Safety Study                                                                         | Cardiovascular Disease | Device     | 165 | 1 | Native Hawaiian or other Pacific Islander | US | Single Group Assignment           | Industry   | 2015 |
| Study of Ixazomib With Pegylated IFN-alpha 2b (pIFN) in Metastatic Renal Cell Carcinoma (mRCC)                        | Kidney Disease         | Drug       | 3   |   | Race and Ethnicity Not Collected          | US | Single Group Assignment           | Industry   | 2015 |
| Tack Optimized Balloon Angioplasty Study of the Tack Endovascular System <sup>™</sup> in Femoropopliteal Arteries     | Cardiovascular Disease | Device     | 213 | 0 |                                           | US | Single Group Assignment           | Industry   | 2015 |
| TactiCath <sup>®</sup> Contact Force Ablation Catheter Study for Atrial Fibrillation Post Approval Study              | Cardiovascular Disease | Device     | 178 | 0 |                                           | US | Single Group Assignment           | Industry   | 2015 |
| Telerehabilitation in the Home Versus Therapy In-Clinic for Patients With Stroke                                      | Cardiovascular Disease | Device     | 124 | 0 |                                           | US | Randomized, Parallel Assignment   | University | 2015 |
| The Combination Ambrisentan Plus Spironolactone in Pulmonary Arterial Hypertension Study                              | Hypertension           | Drug       | 2   |   | Race and Ethnicity Not Collected          | US | Randomized, Crossover Assignment  | Hospital   | 2015 |
| The Effect of Aromatherapy on Neonatal Abstinence Syndrome and Salivary Cortisol Levels                               | Mental Illness         | Drug       | 38  |   | Race and Ethnicity Not Collected          | US | Randomized, Parallel Assignment   | University | 2015 |
| The Effect of Healing Touch on Sleep                                                                                  | Mental Illness         | Behavioral | 41  | 0 |                                           | US | Single Group Assignment           | Hospital   | 2015 |
| Thoracoscopic Lung Cancer Staging With the Use of Intraoperative Ultrasound                                           | Respiratory Disease    | Device     | 9   | 0 |                                           | US | Single Group Assignment           | University | 2015 |
| Three-way, Cross-over Closed-loop Exercise Study                                                                      | Diabetes               | Device     | 23  |   | Race and Ethnicity Not Collected          | US | Randomized, Crossover Assignment  | University | 2015 |
| To Evaluate Safety, Pharmacokinetics and Pharmacodynamics of MEDI6012 in Subjects With Stable Coronary Artery Disease | Cardiovascular Disease | Biological | 48  |   | Race and Ethnicity Not Collected          | US | Randomized, Sequential Assignment | Industry   | 2015 |
| Treatment of Young Adults With Comorbid AUD/MDD: A Pilot Medication Trial                                             | Mental Illness         | Drug       | 7   |   | Race and Ethnicity Not Collected          | US | Randomized, Parallel Assignment   | University | 2015 |

|                                                                                                                                                                                    |                     |            |      |    |                                                                             |    |                                   |                    |      |
|------------------------------------------------------------------------------------------------------------------------------------------------------------------------------------|---------------------|------------|------|----|-----------------------------------------------------------------------------|----|-----------------------------------|--------------------|------|
| Trial To Assess The Safety And Tolerability Of Lucinactant For Inhalation In Preterm Neonates 26 to 28 Weeks PMA                                                                   | Respiratory Disease | Drug       | 48   | 0  |                                                                             | US | Randomized, Sequential Assignment | Industry           | 2015 |
| University of California, San Diego (UCSD) Suramin Autism Treatment-1 (SAT1) Trial                                                                                                 | Mental Illness      | Drug       | 10   | 0  |                                                                             | US | Randomized, Parallel Assignment   | University         | 2015 |
| Valproic Acid for Treatment of Hyperactive or Mixed Delirium in ICU                                                                                                                | Mental Illness      | Drug       | 3    | 1  | Native Hawaiian or Other Pacific Islander                                   | US | Randomized, Parallel Assignment   | University         | 2015 |
| Verapamil for Beta Cell Survival Therapy in Type 1 Diabetes                                                                                                                        | Diabetes            | Drug       | 24   | 0  |                                                                             | US | Randomized, Parallel Assignment   | University         | 2015 |
| Vortioxetine, 5, 10, and 20 mg, Relapse Prevention Study in Adults With Major Depressive Disorder (MDD)                                                                            | Mental Illness      | Drug       | 1106 | 17 | American Indian or Alaska Native, Native Hawaiian or Other Pacific Islander | US | Randomized, Parallel Assignment   | Industry           | 2015 |
| Vulvoscopy Changes of the Vulva, Vestibule and Vagina With Daily Ospemifene in Women With Dyspareunia From VVA                                                                     | Mental Illness      | Drug       | 8    | 0  |                                                                             | US | Single Group Assignment           | Industry           | 2015 |
| Wellness Programs for Brain-Injured Individuals                                                                                                                                    | Mental Illness      | Behavioral | 37   | 0  |                                                                             | US | Randomized, Parallel Assignment   | Research Institute | 2015 |
| 12-Week Study of DS-8500a in Subjects With Type 2 Diabetes Mellitus on Metformin                                                                                                   | Diabetes            | Drug       | 298  | 4  | American Indian or Alaska Native                                            | US | Randomized, Parallel Assignment   | Industry           | 2016 |
| A Phase 1 Study of Continuous Intravenous L-citrulline During Sickle Cell Pain Crisis or Acute Chest Syndrome                                                                      | Respiratory Disease | Drug       | 4    |    | Race and Ethnicity Not Collected                                            | US | Single Group Assignment           | University         | 2016 |
| A Phase 1b Study of MEDI4920 in Participants With Adult-onset Rheumatoid Arthritis                                                                                                 | Arthritis           | Drug       | 57   | 0  |                                                                             | US | Randomized, Parallel Assignment   | Industry           | 2016 |
| A Study of ASP8273 vs. Erlotinib or Gefitinib in First-line Treatment of Patients With Stage IIIB/IV Non-small Cell Lung Cancer Tumors With EGFR Activating Mutations              | Respiratory Disease | Drug       | 530  | 4  | American Indian or Alaska Native                                            | US | Randomized, Parallel Assignment   | Industry           | 2016 |
| A Study of L-DOPA for Depression and Slowing in Older Adults                                                                                                                       | Mental Illness      | Drug       | 47   | 0  |                                                                             | US | Single Group Assignment           | Hospital           | 2016 |
| A Study of the Effect of XmAbA5871 in Patients With Systemic Lupus Erythematosus                                                                                                   | Arthritis           | Biological | 105  | 3  | American Indian or Alaska Native                                            | US | Randomized, Parallel Assignment   | Industry           | 2016 |
| A Study to Evaluate the Efficacy and Safety of Dasotraline in Children 6 to 12 Years of Age With Attention-Deficit Hyperactivity Disorder (ADHD) in a Simulated Classroom Setting. | Mental Illness      | Drug       | 132  | 1  | Native Hawaiian or Other Pacific Islander                                   | US | Randomized, Parallel Assignment   | Industry           | 2016 |

|                                                                                                                                                                 |                        |            |      |   |  |                                                                             |    |                                       |                    |      |
|-----------------------------------------------------------------------------------------------------------------------------------------------------------------|------------------------|------------|------|---|--|-----------------------------------------------------------------------------|----|---------------------------------------|--------------------|------|
| A Study To Evaluate The Safety And Efficacy Of PF-04958242 In Subjects With Cognitive Impairment Associated With Schizophrenia (CIAS)                           | Mental Illness         | Drug       | 35   |   |  | Race and Ethnicity Not Collected                                            | US | Randomized, Parallel Assignment       | Industry           | 2016 |
| Adductor Canal Block Versus Periarticular Bupivacaine Injection in Total Knee Arthroplasty                                                                      | Arthritis              | Drug       | 155  |   |  | Race and Ethnicity Not Collected                                            | US | Randomized, Parallel Assignment       | University         | 2016 |
| An Open Label Trial of Bupropion and Naltrexone for Binge Drinking                                                                                              | Mental Illness         | Drug       | 12   | 0 |  |                                                                             | US | Single Group Assignment               | University         | 2016 |
| Andecaliximab as Add-On Therapy to a Tumor Necrosis Factor Inhibitor and Methotrexate Regimen in Adults With Moderately to Severely Active Rheumatoid Arthritis | Arthritis              | Drug       | 15   | 0 |  |                                                                             | US | Randomized, Parallel Assignment       | Industry           | 2016 |
| Anti-Mesothelin Antibody Drug Conjugate Anetumab Raptansine for Mesothelin Expressing Lung Adenocarcinoma                                                       | Respiratory Disease    | Drug       | 2    | 0 |  |                                                                             | US | Non-randomized, Sequential Assignment | Research Institute | 2016 |
| Buspiron in Parkinson's Disease                                                                                                                                 | Mental Illness         | Drug       | 21   | 0 |  |                                                                             | US | Randomized, Parallel Assignment       | University         | 2016 |
| Cellular Immunotherapy for Viral Induced Cancer - EBV Positive Lymphomas                                                                                        | Cardiovascular Disease | Biological | 1    | 0 |  |                                                                             | US | Single Group Assignment               | Industry           | 2016 |
| Clinical Trial of NAC in Asthma                                                                                                                                 | Respiratory Disease    | Drug       | 1    | 0 |  |                                                                             | US | Randomized, Crossover Assignment      | University         | 2016 |
| Cognitive Behavior Therapy for Work Success in Veterans With Mental Illness: A Pre-post Efficacy Study                                                          | Mental Illness         | Behavioral | 57   | 0 |  |                                                                             | US | Single Group Assignment               | Research Institute | 2016 |
| Comparative Effectiveness of Decision Aids for Stable Chest Discomfort                                                                                          | Cardiovascular Disease | Behavioral | 34   | 0 |  |                                                                             | US | Randomized, Parallel Assignment       | Hospital           | 2016 |
| Comparative Effectiveness of Decision Support Strategies for Joint Replacement Surgery                                                                          | Arthritis              | Behavioral | 1220 | 3 |  | American Indian or Alaska Native, Native Hawaiian or Other Pacific Islander | US | Randomized, Factorial Assignment      | Hospital           | 2016 |
| Double-masked Study of PG324 Ophthalmic Solution in Patients With Open-angle Glaucoma or Ocular Hypertension                                                    | Hypertension           | Drug       | 750  | 1 |  | American Indian or Alaska Native                                            | US | Randomized, Parallel Assignment       | Industry           | 2016 |
| Efficacy of Three Toothpastes Using an in Situ Caries Model                                                                                                     | Dental Disease         | Drug       | 45   | 0 |  |                                                                             | US | Randomized, Crossover Assignment      | Industry           | 2016 |
| ENhancing Outcomes Through Goal Assessment and Generating Engagement in Diabetes Mellitus                                                                       | Diabetes               | Behavioral | 1362 |   |  | Race and Ethnicity Not Collected                                            | US | Randomized, Parallel Assignment       | Industry           | 2016 |
| Evaluation of Web-Based CBT for Women Veterans With PTSD                                                                                                        | Mental Illness         | Behavioral | 102  | 5 |  | American Indian or Alaska Native, Native                                    | US | Randomized, Parallel Assignment       | Research Institute | 2016 |

|                                                                                                                                                 |                        |            |      |   |                                                                             |    |                                     |            |      |
|-------------------------------------------------------------------------------------------------------------------------------------------------|------------------------|------------|------|---|-----------------------------------------------------------------------------|----|-------------------------------------|------------|------|
|                                                                                                                                                 |                        |            |      |   | Hawaiian or Other Pacific Islander                                          |    |                                     |            |      |
| Exploratory Trial to Assess the Functionality of an Integrated Call Center for the Digital Medicine System                                      | Mental Illness         | Drug       | 49   | 0 |                                                                             | US | Single Group Assignment             | Industry   | 2016 |
| FAMS Mobile Health Intervention for Diabetes Self-care Support                                                                                  | Diabetes               | Behavioral | 512  | 5 | American Indian or Alaska Native, Native Hawaiian or Other Pacific Islander | US | Randomized, Parallel Assignment     | University | 2016 |
| Feasibility of Home-based Virtual Reality Rehabilitation for the Upper Extremity in Subacute and Chronic Stroke                                 | Cardiovascular Disease | Device     | 20   | 0 |                                                                             | US | Single Group Assignment             | University | 2016 |
| Hyperbaric Oxygen Therapy as Adjunctive Therapy to Scaling and Root-planing in the Management of Periodontitis in Patients With Type 2 Diabetes | Diabetes               | Device     | 3    | 0 |                                                                             | US | Non-randomized, Parallel Assignment | University | 2016 |
| Investigation Into the Effects of Blood Glucose Levels Upon Eating Behavior in Lean and Obese Non-diabetic and Diabetic Subjects                | Diabetes               | Behavioral | 31   | 0 |                                                                             | US | Non-randomized, Parallel Assignment | NIH        | 2016 |
| Involving Family to Improve Communication in Primary Care                                                                                       | Mental Illness         | Other      | 93   | 0 |                                                                             | US | Randomized, Parallel Assignment     | University | 2016 |
| Iron Isomaltoside/Ferric Derisomaltose vs Iron Sucrose for Treatment of Iron Deficiency Anemia in Non-Dialysis-Dependent Chronic Kidney Disease | Kidney Disease         | Drug       | 1538 | 5 | American Indian or Alaska Native, Native Hawaiian or Other Pacific Islander | US | Randomized, Parallel Assignment     | Industry   | 2016 |
| Liposomal Bupivacaine for Pain Control After Total Shoulder Arthroplasty                                                                        | Arthritis              | Drug       | 108  | 0 |                                                                             | US | Randomized, Parallel Assignment     | University | 2016 |
| Methohexital v Propofol as General Anesthetic in Patients on ACEIs or ARBs                                                                      | Cardiovascular Disease | Drug       | 51   |   | Race and Ethnicity Not Collected                                            | US | Randomized, Parallel Assignment     | Hospital   | 2016 |
| Milrinone in Addition to Hyperdynamic Therapy in the Treatment of Vasospasm Following Aneurysmal Subarachnoid Hemorrhage                        | Cardiovascular Disease | Drug       | 4    | 0 |                                                                             | US | Randomized, Parallel Assignment     | University | 2016 |
| Modulating Interaction of Motor Learning Networks in Rehabilitation of Stroke                                                                   | Cardiovascular Disease | Device     | 10   | 0 |                                                                             | US | Randomized, Crossover Assignment    | NIH        | 2016 |
| NeoSync TMS Treatment for Bipolar I Depression                                                                                                  | Mental Illness         | Device     | 6    | 0 |                                                                             | US | Single Group Assignment             | Hospital   | 2016 |

|                                                                                                                                                                                                      |                        |            |     |   |                                           |    |                                       |                    |      |
|------------------------------------------------------------------------------------------------------------------------------------------------------------------------------------------------------|------------------------|------------|-----|---|-------------------------------------------|----|---------------------------------------|--------------------|------|
| Novel Methods for Ascertainment of Gout Flares -A Pilot Study                                                                                                                                        | Arthritis              | Device     | 44  | 0 |                                           | US | Randomized, Crossover Assignment      | University         | 2016 |
| OHI--Randomized Control Trial to Evaluate Efficacy, Acceptability, and Perception of Benefit of an Innovative Custom AFO                                                                             | Cardiovascular Disease | Device     | 44  | 0 |                                           | US | Randomized, Parallel Assignment       | University         | 2016 |
| Physical Activity Behavior Change for Older Adults After Dysvascular Amputation                                                                                                                      | Diabetes               | Behavioral | 31  | 2 | American Indian or Alaska Native          | US | Randomized, Crossover Assignment      | Research Institute | 2016 |
| Probiotics for Quality of Life in Autism Spectrum Disorders                                                                                                                                          | Mental Illness         | Drug       | 13  | 0 |                                           | US | Randomized, Crossover Assignment      | University         | 2016 |
| Pulmonary Artery Pressure Reduction With ENTresto (Sacubitril/Valsartan)                                                                                                                             | Cardiovascular Disease | Device     | 4   | 0 |                                           | US | Randomized, Parallel Assignment       | Hospital           | 2016 |
| Remote Surveillance of Postpartum Hypertension                                                                                                                                                       | Hypertension           | Other      | 206 | 0 |                                           | US | Randomized, Parallel Assignment       | University         | 2016 |
| Ridge Preservation Following Tooth Extraction Using Porcine and Bovine Xenograft Materials                                                                                                           | Dental Disease         | Device     | 44  | 0 |                                           | US | Randomized, Parallel Assignment       | University         | 2016 |
| Safety and Efficacy of BL-8040 for the Mobilization of Donor Hematopoietic Stem Cells and Allogeneic Transplantation in Patients With Advanced Hematological Malignancies                            | Cardiovascular Disease | Drug       | 50  | 0 |                                           | US | Non-randomized, Parallel Assignment   | University         | 2016 |
| Stopping Cavities Study: Diammine Silver Fluoride                                                                                                                                                    | Dental Disease         | Drug       | 64  | 2 | American Indian or Alaska Native          | US | Randomized, Parallel Assignment       | Industry           | 2016 |
| Study Comparing Daratumumab, Lenalidomide, Bortezomib, and Dexamethasone (D-RVd) Versus Lenalidomide, Bortezomib, and Dexamethasone (RVd) in Subjects With Newly Diagnosed Multiple Myeloma          | Cardiovascular Disease | Drug       | 224 | 0 |                                           | US | Randomized, Parallel Assignment       | Research Institute | 2016 |
| Study of TAK-071 in Healthy Participants and Participants With Mild Cognitive Impairment/Mild Alzheimer Disease and Relative Bioavailability (BA) and Food Effect of TAK-071 in Healthy Participants | Mental Illness         | Drug       | 179 | 4 | Native Hawaiian or Other Pacific Islander | US | Randomized, Parallel Assignment       | Industry           | 2016 |
| Study of the Pan-DAC Inhibitor AR-42 and Pazopanib in Advanced Sarcoma and Kidney Cancer                                                                                                             | Kidney Disease         | Drug       | 6   | 0 |                                           | US | Non-randomized, Sequential Assignment | NIH                | 2016 |
| Study to Assess Efficacy and Safety of HP3070 in Subjects Diagnosed With Schizophrenia.                                                                                                              | Mental Illness         | Drug       | 617 | 1 | American Indian or Alaska Native          | US | Randomized, Parallel Assignment       | Industry           | 2016 |
| Study to Assess the Effects of FX006 on Blood Glucose in Patients With OA of the Knee and Type 2 Diabetes                                                                                            | Diabetes               | Drug       | 33  |   | Race and Ethnicity Not Collected          | US | Randomized, Parallel Assignment       | Industry           | 2016 |
| Study to Evaluate the Efficacy and Safety of Adjunctive Pimavanserin in Major Depressive Disorder (CLARITY)                                                                                          | Mental Illness         | Drug       | 207 | 4 | American Indian or Alaska Native          | US | Randomized, Parallel Assignment       | Industry           | 2016 |



|                                                                                                                   |                        |            |     |   |                                                                       |    |                                     |                    |      |
|-------------------------------------------------------------------------------------------------------------------|------------------------|------------|-----|---|-----------------------------------------------------------------------|----|-------------------------------------|--------------------|------|
| Technology Assisted Programs That Promote Mental Health for Teenagers                                             | Mental Illness         | Behavioral | 40  |   |                                                                       | US | Non-randomized, Parallel Assignment | University         | 2016 |
| The iLet Introduction Study: A Feasibility Study of the iLet, a Fully Integrated Bihormonal Bionic Pancreas       | Diabetes               | Device     | 20  | 0 |                                                                       | US | Randomized, Crossover Assignment    | Hospital           | 2016 |
| The Use of Mini-dose Glucagon to Prevent Exercise-induced Hypoglycemia in Type 1 Diabetes                         | Diabetes               | Other      | 15  | 0 |                                                                       | US | Randomized, Crossover Assignment    | Research Institute | 2016 |
| ToRsemide for pOstpartum HYPertension                                                                             | Hypertension           | Drug       | 118 | 0 |                                                                       | US | Randomized, Parallel Assignment     | University         | 2016 |
| Trial to Evaluate the Effect of ALN-PCSSC Treatment on Low Density Lipoprotein Cholesterol (LDL-C)                | Cardiovascular Disease | Drug       | 501 | 7 | American Indian or Alaska Native, Native Hawaiian or Pacific Islander | US | Randomized, Parallel Assignment     | Industry           | 2016 |
| Use of Lexiscan for Myocardial Stress Perfusion Computed Tomography With a 3rd Generation Dual Source CT System   | Cardiovascular Disease | Drug       | 24  |   |                                                                       | US | Single Group Assignment             | University         | 2016 |
| Virtual Reality Training for Social Skills in Schizophrenia                                                       | Mental Illness         | Behavioral | 47  | 1 | American Indian or Alaska Native                                      | US | Randomized, Parallel Assignment     | University         | 2016 |
| A Comparison of Methods of Discontinuing Nasal CPAP in Premature Infants <30 Weeks Gestation                      | Respiratory Disease    | Device     | 66  |   | Race and Ethnicity Not Collected                                      | US | Randomized, Parallel Assignment     | University         | 2017 |
| A Study of Pimavanserin for the Treatment of Agitation and Aggression in Subjects With Alzheimer's Disease        | Mental Illness         | Drug       | 78  | 0 |                                                                       | US | Single Group Assignment             | Industry           | 2017 |
| A Study of the Effectiveness and Efficacy of the PowerSleep Device                                                | Mental Illness         | Device     | 84  | 0 |                                                                       | US | Randomized, Crossover Assignment    | Industry           | 2017 |
| A Study to Assess the Analgesic Efficacy and Safety of ASP8062 in Subjects With Fibromyalgia                      | Arthritis              | Drug       | 183 | 3 | American Indian or Alaska Native                                      | US | Randomized, Parallel Assignment     | Industry           | 2017 |
| A Study to Assess the PK and Safety of PT010 in Subjects With COPD Following Single and Repeat Dose               | Respiratory Disease    | Drug       | 30  | 0 |                                                                       | US | Single Group Assignment             | Industry           | 2017 |
| A Study to Evaluate Efficacy and Safety of Anakinra in the Treatment of Still's Disease (SJIA and AOSD)           | Arthritis              | Biological | 12  | 0 |                                                                       | US | Randomized, Parallel Assignment     | Industry           | 2017 |
| Assessment of Glycemic Control in Patients With Type 2 Diabetes Mellitus and Late Stage Chronic Kidney Disease    | Diabetes               | Device     | 80  | 1 | American Indian or Alaska Native                                      | US | Single Group Assignment             | Research Institute | 2017 |
| Carfilzomib With or Without Rituximab in the Treatment of Waldenström Macroglobulinemia or Marginal Zone Lymphoma | Cardiovascular Disease | Drug       | 4   | 0 |                                                                       | US | Single Group Assignment             | NIH                | 2017 |

|                                                                                                                                                           |                        |            |     |   |                                           |    |                                  |                    |      |
|-----------------------------------------------------------------------------------------------------------------------------------------------------------|------------------------|------------|-----|---|-------------------------------------------|----|----------------------------------|--------------------|------|
| Continuous Glucose Monitors to Regulate Glucose Levels in Type 2 Diabetics                                                                                | Diabetes               | Behavioral | 358 |   | Race and Ethnicity Not Collected          | US | Single Group Assignment          | Industry           | 2017 |
| Daily Step-based Exercise Using Fitness Monitors for Peripheral Artery Disease                                                                            | Cardiovascular Disease | Behavioral | 20  |   | Race and Ethnicity Not Collected          | US | Randomized, Parallel Assignment  | University         | 2017 |
| Danirixin Dose Ranging Study in Participants With Chronic Obstructive Pulmonary Disease (COPD)                                                            | Respiratory Disease    | Drug       | 614 | 1 | Native Hawaiian or other Pacific Islander | US | Randomized, Parallel Assignment  | Industry           | 2017 |
| Efficacy and Safety of SHP465 at 6.25 mg in the Treatment of Attention-Deficit/Hyperactivity Disorder (ADHD) in Children Aged 6-12 Years                  | Mental Illness         | Drug       | 89  | 1 | American Indian or Alaska Native          | US | Randomized, Parallel Assignment  | Industry           | 2017 |
| Efficacy of Glucagon In the Prevention of Hypoglycemia During Mild Exercise                                                                               | Diabetes               | Drug       | 22  | 0 |                                           | US | Randomized, Crossover Assignment | Hospital           | 2017 |
| Emergence Agitation and Pain Scores in Pediatrics When Comparing Single-modal vs Multi-modal Analgesia for ENT Surgery                                    | Mental Illness         | Drug       | 143 | 0 |                                           | US | Randomized, Parallel Assignment  | Hospital           | 2017 |
| Evaluation of Coronary Artery Calcification Using Gated Stationary Chest Tomosynthesis                                                                    | Cardiovascular Disease | Device     | 10  | 0 |                                           | US | Single Group Assignment          | University         | 2017 |
| Hemodynamic Effects of Blood Flow Variation in Continuous Renal Replacement Therapy                                                                       | Kidney Disease         | Device     | 6   |   | Race and Ethnicity Not Collected          | US | Single Group Assignment          | University         | 2017 |
| Human Laboratory Study of Varenicline for Alcohol Use Disorder                                                                                            | Mental Illness         | Drug       | 47  | 0 |                                           | US | Randomized, Parallel Assignment  | NIH                | 2017 |
| Management of Platelet Transfusion Therapy in Patients With Blood Cancer or Treatment-Induced Thrombocytopenia                                            | Cardiovascular Disease | Biological | 4   | 0 |                                           | US | Randomized, Parallel Assignment  | NIH                | 2017 |
| Multiple Ascending Doses of MEDI6012 in Subjects With Stable Atherosclerotic Cardiovascular Disease                                                       | Cardiovascular Disease | Drug       | 32  | 0 |                                           | US | Randomized, Parallel Assignment  | Industry           | 2017 |
| Neoadjuvant Pembrolizumab                                                                                                                                 | Respiratory Disease    | Drug       | 35  | 0 |                                           | US | Single Group Assignment          | University         | 2017 |
| New Approaches to Smoking Cessation in Heavy Drinkers                                                                                                     | Mental Illness         | Drug       | 26  | 0 |                                           | US | Randomized, Parallel Assignment  | NIH                | 2017 |
| Oral Nitrite for Older Heart Failure With Preserved Ejection Fraction                                                                                     | Cardiovascular Disease | Drug       | 15  |   | Race and Ethnicity Not Collected          | US | Randomized, Parallel Assignment  | NIH                | 2017 |
| Paradoxical Stimulation of Hepatic Glucose Production With Dapagliflozin                                                                                  | Diabetes               | Drug       | 30  | 0 |                                           | US | Randomized, Parallel Assignment  | University         | 2017 |
| PTC Study to Evaluate Ataluren in Combination With Ivacaftor                                                                                              | Respiratory Disease    | Drug       | 1   | 0 |                                           | US | Single Group Assignment          | University         | 2017 |
| Single Agent Chemotherapy +/- Nivolumab in Patients With Advanced Squamous or Non-squamous NSCLC With Primary Resistance to Prior PD-1 or PDL-1 Inhibitor | Respiratory Disease    | Drug       | 3   | 0 |                                           | US | Randomized, Parallel Assignment  | Research Institute | 2017 |

|                                                                                                                                                                                                                                                                                                              |                     |            |     |   |                                                                             |    |                                  |            |      |
|--------------------------------------------------------------------------------------------------------------------------------------------------------------------------------------------------------------------------------------------------------------------------------------------------------------|---------------------|------------|-----|---|-----------------------------------------------------------------------------|----|----------------------------------|------------|------|
| Study of Naltrexone-Induced Blockade of Antidepressant Effects                                                                                                                                                                                                                                               | Mental Illness      | Drug       | 20  |   | Race and Ethnicity Not Collected                                            | US | Randomized, Crossover Assignment | University | 2017 |
| Study of PEMF to Evaluate VPT and Thermal Sensory in Subjects With Diabetic Peripheral Neuropathy                                                                                                                                                                                                            | Diabetes            | Device     | 37  | 0 |                                                                             | US | Randomized, Parallel Assignment  | Industry   | 2017 |
| Study to Compare Palindrome vs. BioFlo DuraMax Dialysis Catheters                                                                                                                                                                                                                                            | Kidney Disease      | Device     | 32  |   | Race and Ethnicity Not Collected                                            | US | Randomized, Parallel Assignment  | University | 2017 |
| The ENERGITOÁ® 2 Study Compares 2 Inhaled Medicines for Chronic Obstructive Pulmonary Disease (COPD). One Medicine is a Combination of Tiotropium and Olodaterol (StioltoÁ®) Taken Using the RespimatÁ® Inhaler and the Other Medicine is a Combination of Fluticasone and Salmeterol Taken Using the Diskus | Respiratory Disease | Drug       | 302 | 0 |                                                                             | US | Randomized, Parallel Assignment  | Industry   | 2017 |
| Vitabreath Pilot in Chronic Obstructive Pulmonary Disease (COPD) Patients                                                                                                                                                                                                                                    | Respiratory Disease | Device     | 25  | 0 |                                                                             | US | Randomized, Crossover Assignment | Industry   | 2017 |
| A Comparative Study of Electric Toothbrushes for the Efficacy Plaque Removal and the Effect on Plaque Accumulation and Gingivitis.                                                                                                                                                                           | Dental Disease      | Device     | 90  |   | Race and Ethnicity Not Collected                                            | US | Randomized, Parallel Assignment  | University | 2018 |
| A Phase 2 Clinical Trial Examining the Effects on Osteoarthritic Knee Pain of CGS-200-1, CGS-200-5 and Vehicle Control                                                                                                                                                                                       | Arthritis           | Drug       | 122 | 0 |                                                                             | US | Randomized, Parallel Assignment  | Industry   | 2018 |
| A Study to Determine the Maximum Tolerated Dose of an Investigational Drug in Subjects With Schizophrenia                                                                                                                                                                                                    | Mental Illness      | Drug       | 40  | 1 | Native Hawaiian or Other Pacific Islander                                   | US | Randomized, Parallel Assignment  | Industry   | 2018 |
| A Study to Evaluate Efficacy and Safety of TEZ/IVA in Subjects Aged 6 Through 11 Years With Cystic Fibrosis                                                                                                                                                                                                  | Respiratory Disease | Drug       | 67  | 0 |                                                                             | US | Randomized, Parallel Assignment  | Industry   | 2018 |
| Brief Online Interventions for Alcohol Use                                                                                                                                                                                                                                                                   | Mental Illness      | Behavioral | 444 | 0 |                                                                             | US | Randomized, Parallel Assignment  | NIH        | 2018 |
| CrYobiopsy With Radial UltraSound Guidance                                                                                                                                                                                                                                                                   | Respiratory Disease | Device     | 10  | 0 |                                                                             | US | Randomized, Parallel Assignment  | University | 2018 |
| Efficacy and Safety Study of a Test Naproxen Sodium 220mg Tablet in Postoperative Dental Pain                                                                                                                                                                                                                | Dental Disease      | Drug       | 501 | 7 | American Indian or Alaska Native, Native Hawaiian or Other Pacific Islander | US | Randomized, Parallel Assignment  | Industry   | 2018 |
| Knee Injection RCT                                                                                                                                                                                                                                                                                           | Arthritis           | Drug       | 18  | 0 |                                                                             | US | Randomized, Parallel Assignment  | Industry   | 2018 |

|                                                                                                                                                          |                        |        |    |   |                                  |    |                                     |            |      |
|----------------------------------------------------------------------------------------------------------------------------------------------------------|------------------------|--------|----|---|----------------------------------|----|-------------------------------------|------------|------|
| Lutonix Drug Coated Balloon for Treatment of Femoropopliteal Arteries in United States Females (CONFIRM)                                                 | Cardiovascular Disease | Device | 4  | 0 |                                  | US | Single Group Assignment             | Industry   | 2018 |
| Penile Lengthening Pre-Penile Prosthesis Implantation                                                                                                    | Mental Illness         | Device | 24 |   | Race and Ethnicity Not Collected | US | Non-randomized, Parallel Assignment | Hospital   | 2018 |
| Study to Evaluate the Pharmacokinetics of Lemborexant (E2006) and Its Metabolites in Subjects With Normal Renal Function or With Severe Renal Impairment | Kidney Disease         | Drug   | 16 | 0 |                                  | US | Non-randomized, Parallel Assignment | Industry   | 2018 |
| Subcutaneous Furosemide in Acute Decompensated Heart Failure: The SUBQ-HF Study                                                                          | Cardiovascular Disease | Drug   | 11 | 0 |                                  | US | Randomized, Parallel Assignment     | University | 2018 |
| To Assess the Bioequivalence of the 4mg Prototype Mini Nicotine Lozenge to the Reference Product (Nicorette) in Healthy Smokers                          | Mental Illness         | Drug   | 37 | 1 | American Indian or Alaska Native | US | Randomized, Crossover Assignment    | Industry   | 2018 |

**\*Indigenous Population: “Race and Ethnicity Not Collected”:** Refers to studies that did not collect race and ethnicity data; **“Not Available”:** Refers to studies that we were unable to obtain and extract Indigenous enrollment data; and **“Blank”:** Refers to studies that did not include Indigenous populations.

**Figure S1. PRISMA flow diagram of general population trials.**

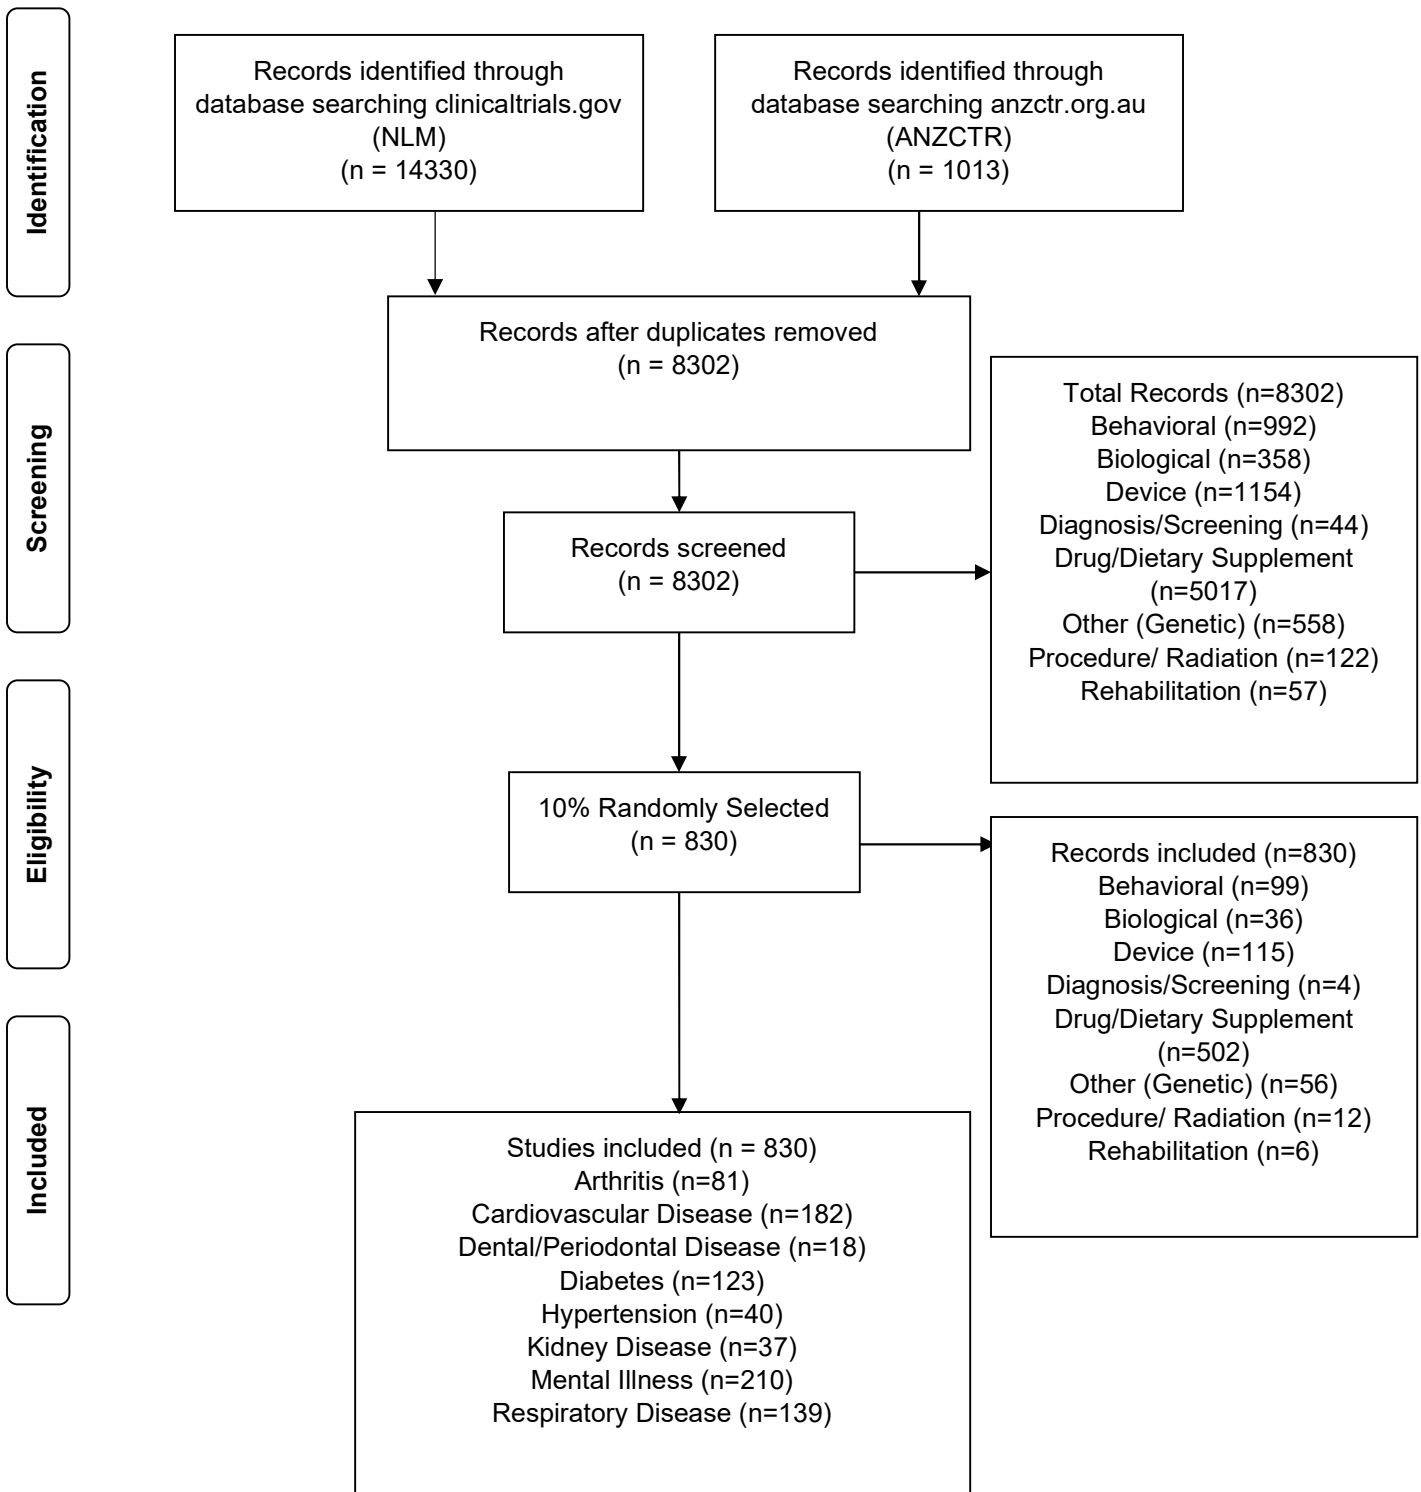

Supplement: sj-pdf-1-ctj-10.1177_17407745211069153.pdf [file sj-pdf-1-ctj-10.1177_17407745211069153.pdf]
